# Supplementary material for: Machine Learning Prediction of Intestinal α-Glucosidase Inhibitors Using a Diverse Set of Ligands: A Drug Repurposing Effort with DrugBank Database Screening
Source: Research Square preprint supplement (doi:10.21203/rs.3.rs-4265680/v1), 2024-04-18
Supplement: Supplementary file 1 [file 1612cfe3309ff52192fb926f.docx]

**SUPPLEMENTARY INFORMATION**

Machine Learning Prediction of Intestinal α-Glucosidase Inhibitors Using a Diverse Set of Ligands: A Drug Repurposing Effort with DrugBank Database Screening

Adeshina I. Odugbemi1,4, Clement Nyirenda2, Alan Christoffels1, Samuel A. Egieyeh3,4*

1 South African Medical Research Council Bioinformatics Unit, South African National Bioinformatics Institute, University of the Western Cape, Bellville, Cape Town 7535, South Africa.

2 Department of Computer Science, University of the Western Cape, Cape Town 7535, South Africa.

3 School of Pharmacy, University of the Western Cape, Bellville, Cape Town 7535, South Africa.

4 National Institute for Theoretical and Computational Sciences (NITheCS), South Africa.

* Corresponding author

E-mail: [segieyeh@uwc.ac.za](mailto:segieyeh@uwc.ac.za)

**Contents**

[Figure S1: Confusion Matrices for all test sets across the 2D and 3D descriptors, and the ECFP dataset 3](#_Toc164005361)

[Figure S2: Confusion Matrices for all training sets across the 2D and 3D descriptors, and the ECFP dataset 4](#_Toc164005362)

[Figure S3: Learning curves for the untuned RF and SVM models 5](#_Toc164005363)

[Table S1: Docking scores and MM-GBSA free binding energies of virtual screening hits. 5](#_Toc164005364)

[Figure S4: The 2D ligand interaction diagram of α-glucosidase (2QMJ) binding with (a) Dihydro-Acarbose (DB04226) (b) N-[2-(1-maleimidyl) ethyl]-7-diethylaminocoumarin-3-carboxamide (DB02799) (c) Hygromycin B (DB11520) (d) Apramycin (DB04626) (e) Amikacin (DB00479) 6](#_Toc164005365)

[Figure S5: Ligand-protein percentage contacts for (a) Dihydro-Acarbose (DB04226) (b) N-[2-(1-maleimidyl) ethyl]-7-diethylaminocoumarin-3-carboxamide (DB02799) (c) Hygromycin B (DB11520) (d) Apramycin (DB04626) and (e) Amikacin (DB00479) for at least 30% of the simulation time. 7](#_Toc164005366)

|  | 2D Dataset | 3D Dataset | ECFP4 Dataset |
| --- | --- | --- | --- |
| RF | 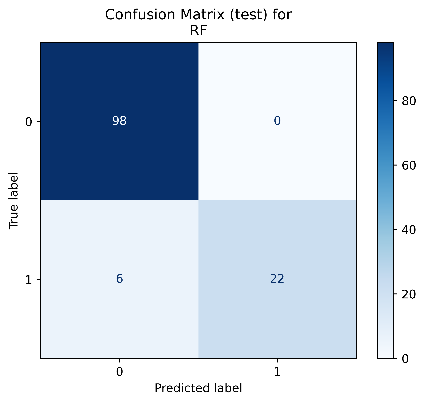 | 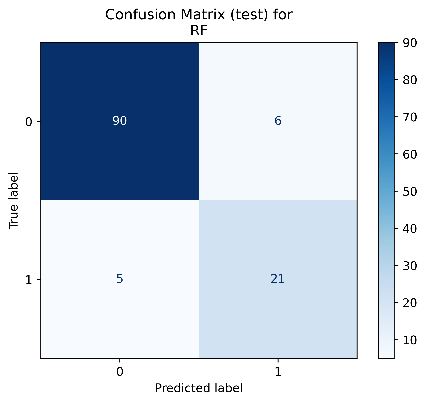 | 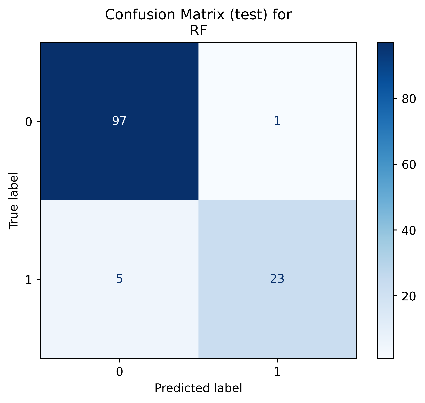 |
| RF Tuned | 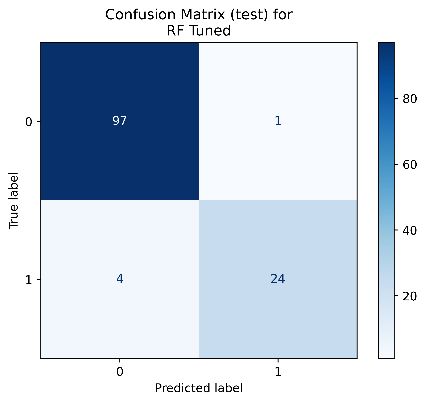 | 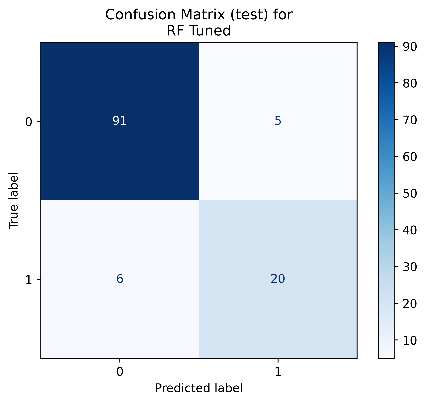 | 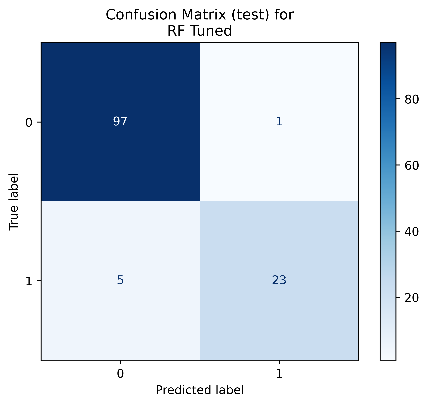 |
| SVM | 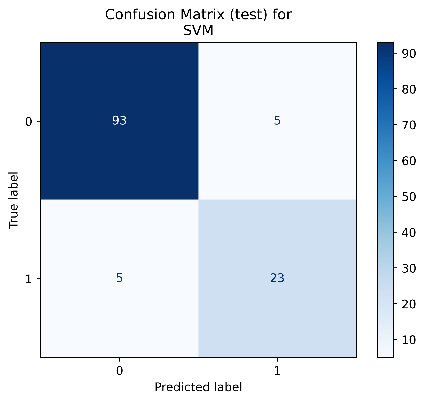 | 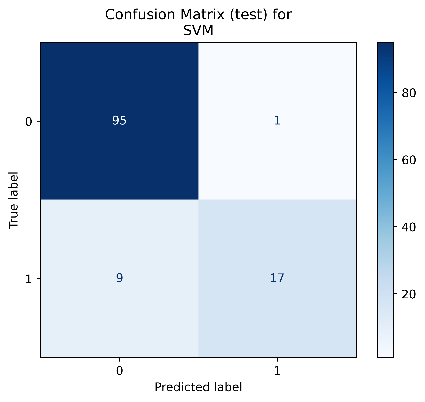 | 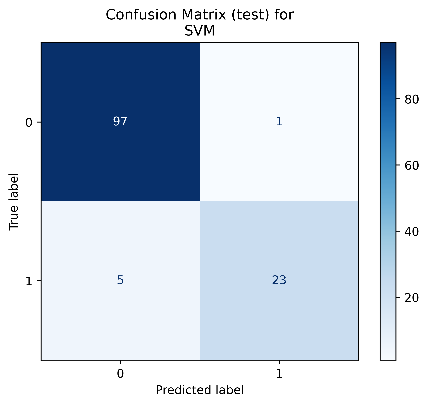 |
| SVM Tuned | 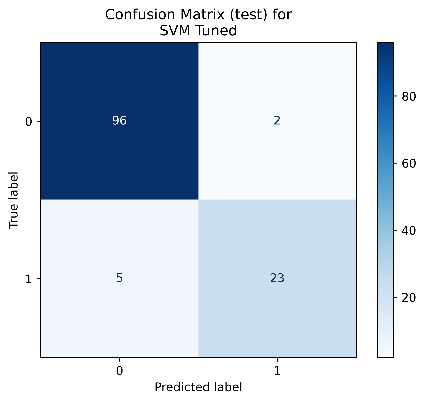 | 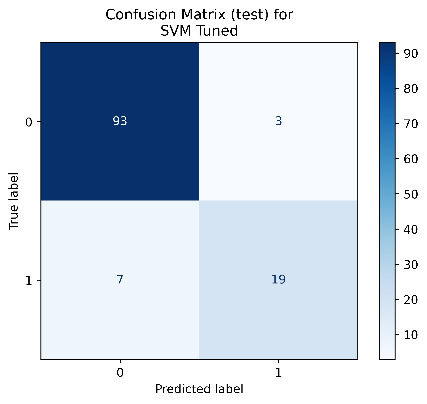 | 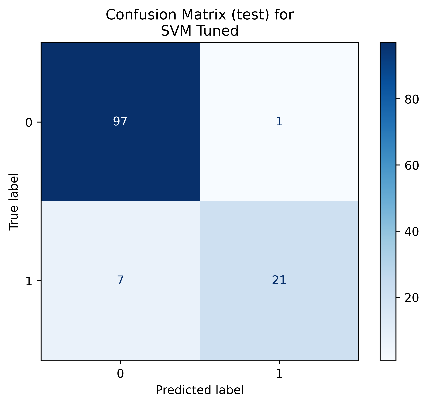 |

# Figure S1: Confusion Matrices for all test sets across the 2D and 3D descriptors, and the ECFP dataset

|  | 2D Dataset | 3D Dataset | ECFP4 Dataset |
| --- | --- | --- | --- |
| RF | 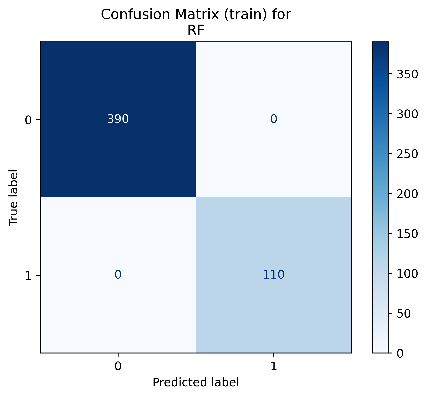 | 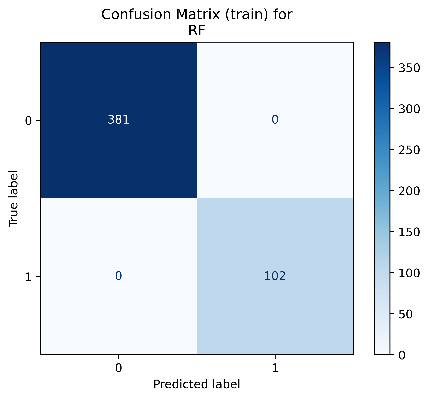 | 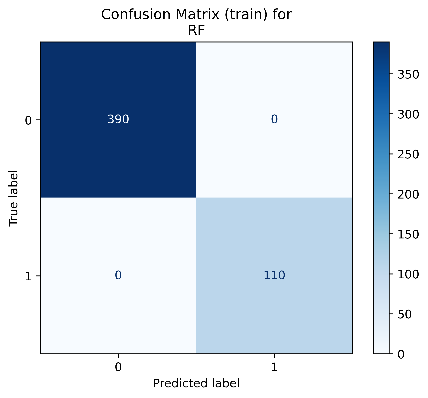 |
| RF Tuned | 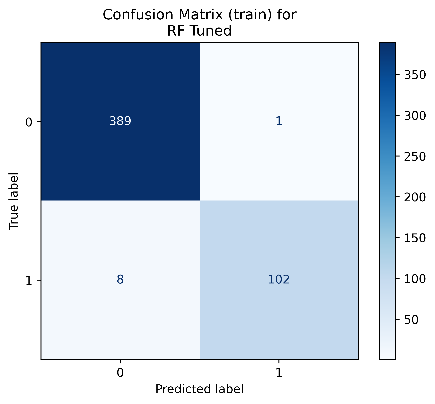 | 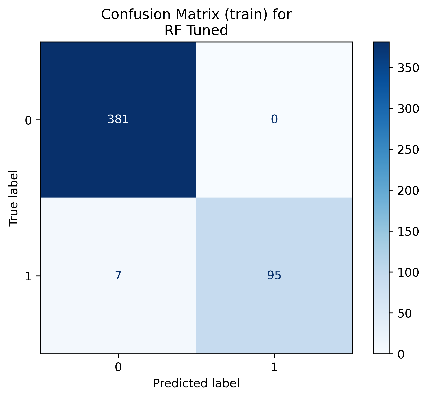 | 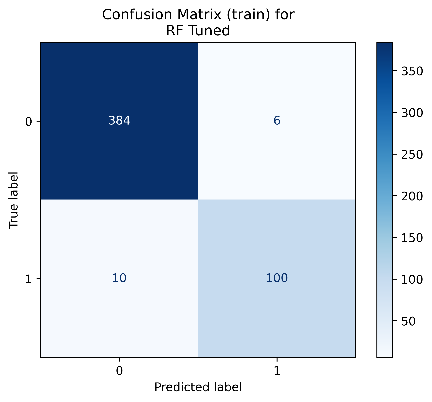 |
| SVM | 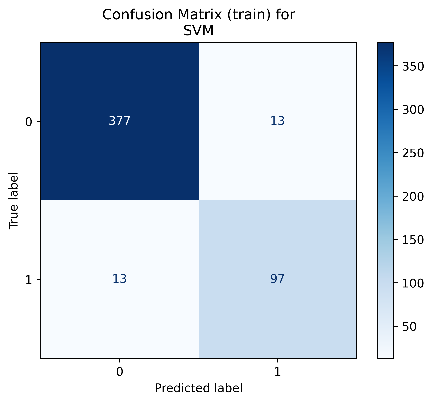 | 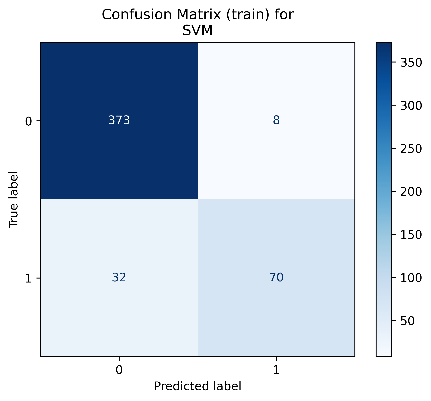 | 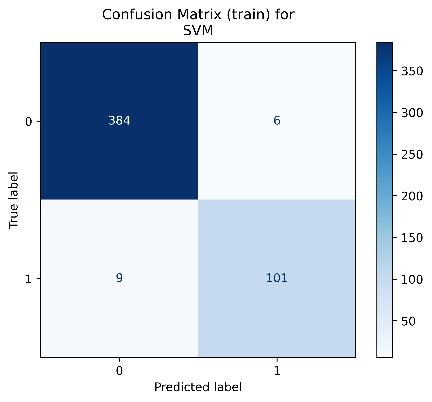 |
| SVM Tuned | 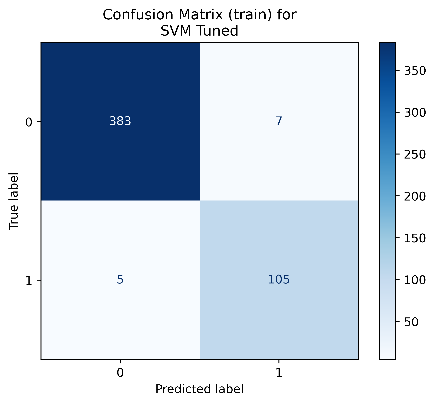 | 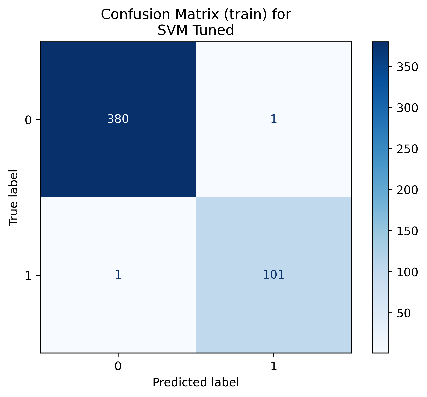 | 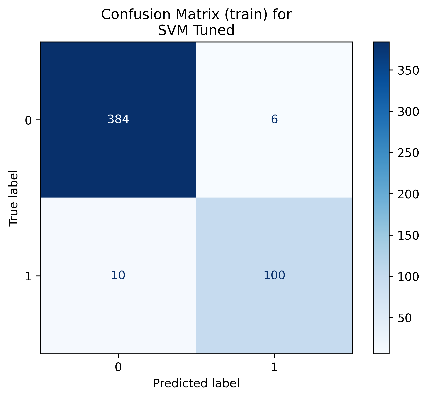 |

# Figure S2: Confusion Matrices for all training sets across the 2D and 3D descriptors, and the ECFP dataset

|  | 2D Dataset | 3D Dataset | ECFP4 Dataset |
| --- | --- | --- | --- |
| RF | 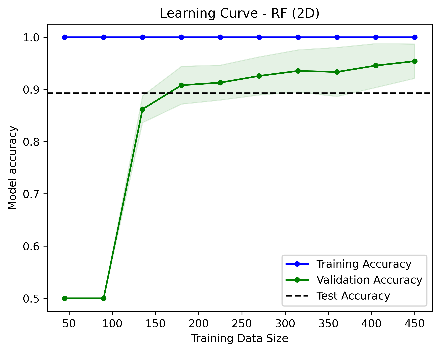 | 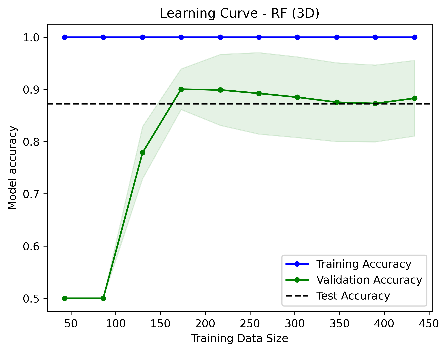 | 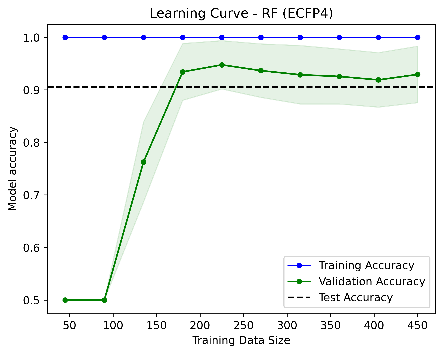 |
| SVM | 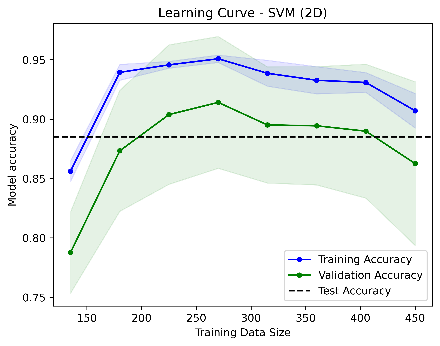 | 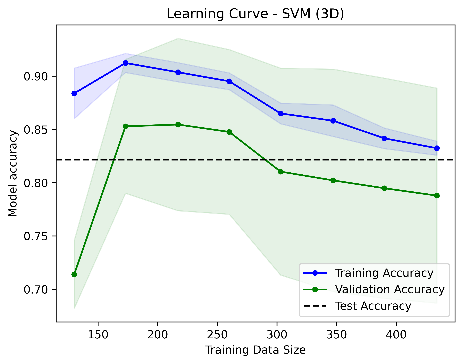 | 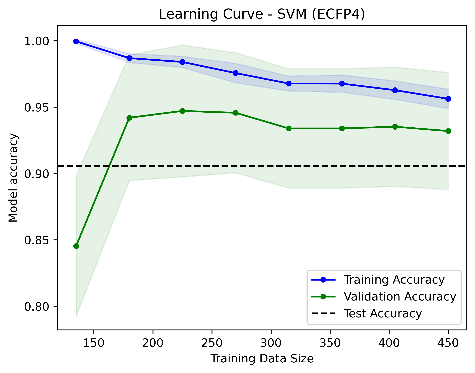 |

# Figure S3: Learning curves for the untuned RF and SVM models

# Table S1: Docking scores and MM-GBSA free binding energies of virtual screening hits.

| Drug name | DrugBank ID | Docking Score (Kcal/mol) | MMGBSA dGbind (Kcal/mol) |
| --- | --- | --- | --- |
| Dihydro-Acarbose | DB04226 | -10.94 | -27.03 |
| N-[2-(1-maleimidyl)ethyl]-7-diethylaminocoumarin-3-carboxamide | DB02799 | -2.86 | -15.03 |
| Hygromycin B | DB11520 | -13.28 | -22.93 |
| Apramycin | DB04626 | -9.77 | -55.28 |
| Amikacin | DB00479 | -13.32 | -39.43 |

| (a) | 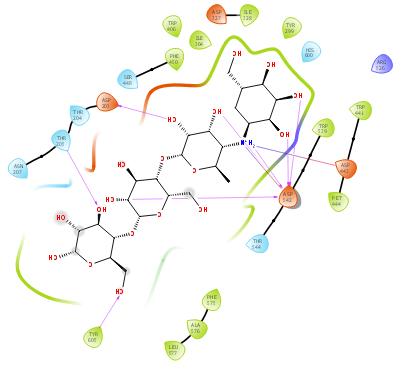 | 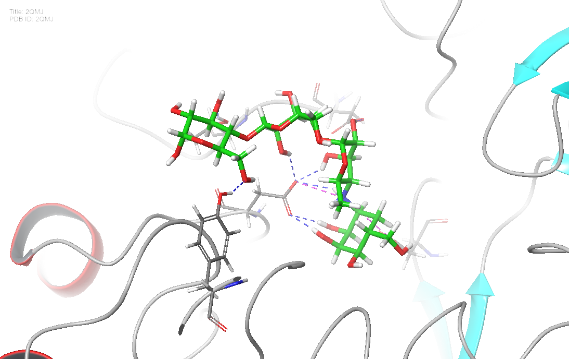 |
| --- | --- | --- |
| (b) | 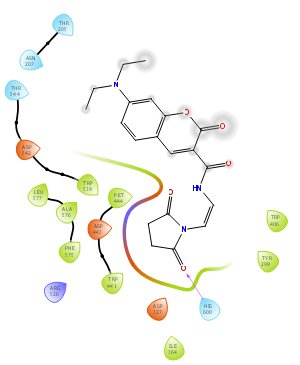 | 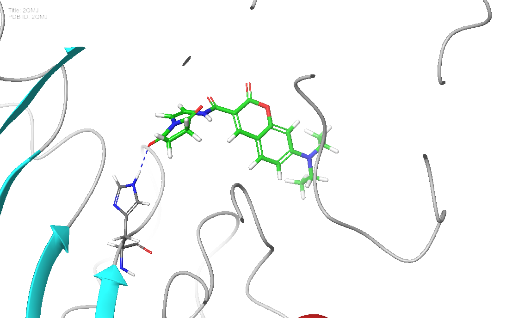 |
| (c) | 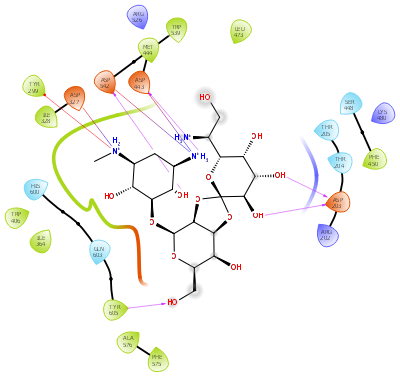 | 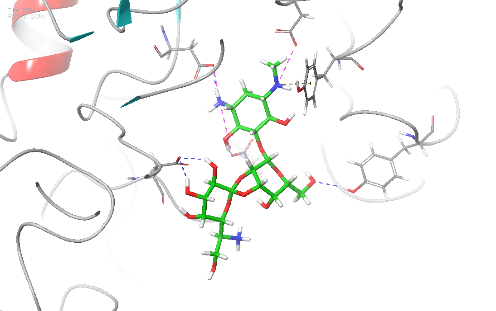 |
| (d) | 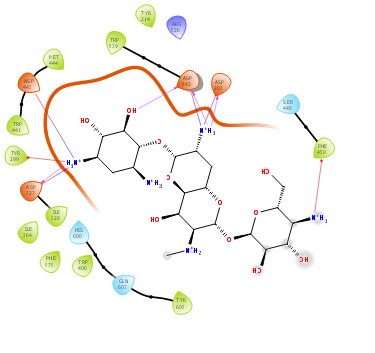 | 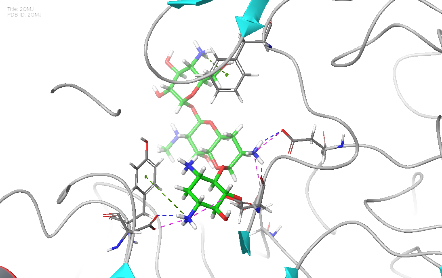 |
| (e) | 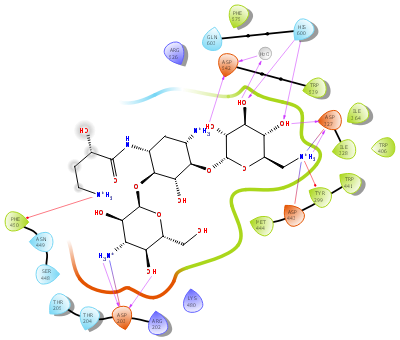 | 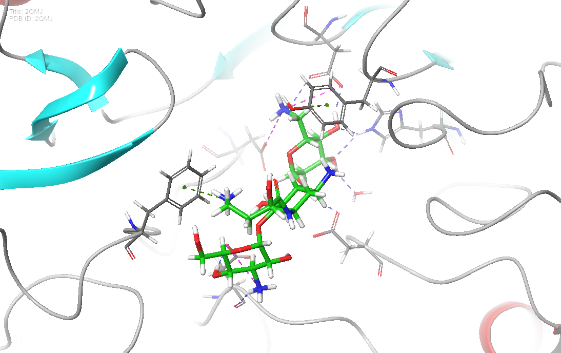 |
|  | 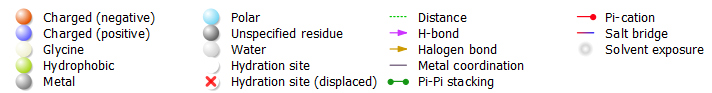 | |

# Figure S4: The 2D ligand interaction diagram of α-glucosidase (2QMJ) binding with (a) Dihydro-Acarbose (DB04226) (b) N-[2-(1-maleimidyl) ethyl]-7-diethylaminocoumarin-3-carboxamide (DB02799) (c) Hygromycin B (DB11520) (d) Apramycin (DB04626) (e) Amikacin (DB00479)

| (a)  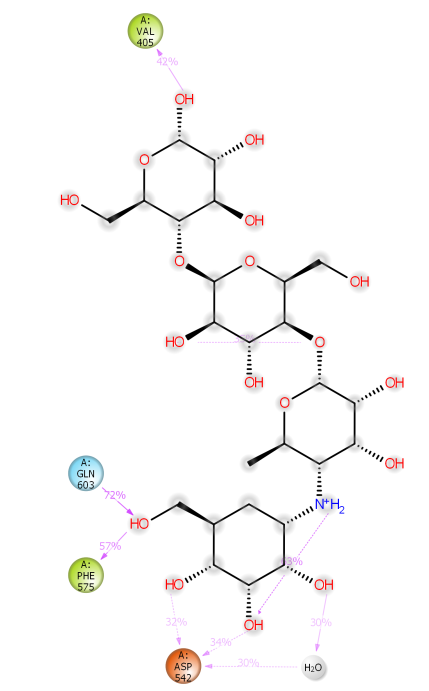 | (b)  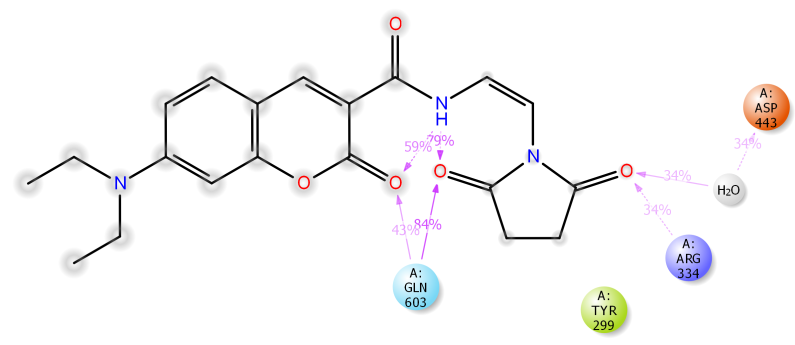 |
| --- | --- |
| (c)  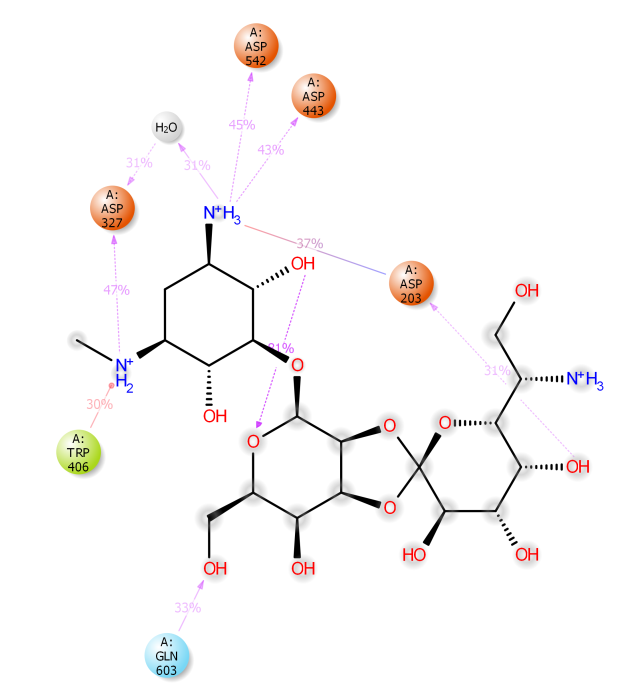 |
| (d)  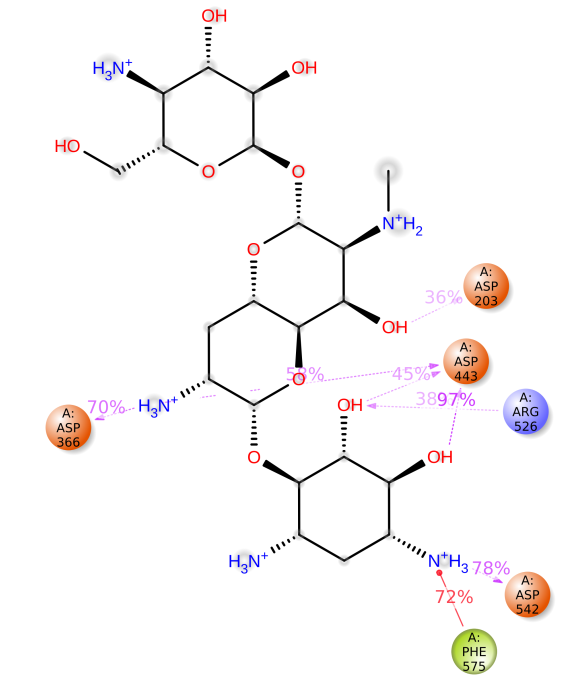 | (e)  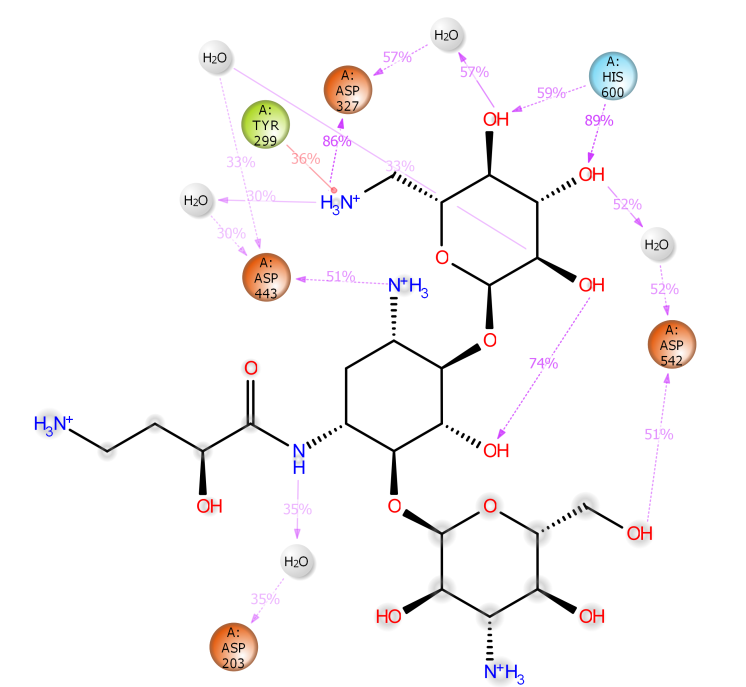  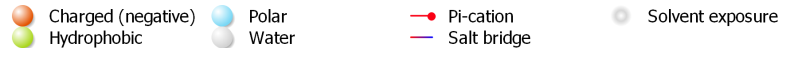 |

# Figure S5: Ligand-protein percentage contacts for (a) Dihydro-Acarbose (DB04226) (b) N-[2-(1-maleimidyl) ethyl]-7-diethylaminocoumarin-3-carboxamide (DB02799) (c) Hygromycin B (DB11520) (d) Apramycin (DB04626) and (e) Amikacin (DB00479) for at least 30% of the simulation time.
