# Supplementary material for: Machine Learning Prediction of Intestinal α-Glucosidase Inhibitors Using a Diverse Set of Ligands: A Drug Repurposing Effort with DrugBank Database Screening
Source: Research Square preprint supplement (doi:10.21203/rs.3.rs-4265680/v1), 2024-04-18
Supplement: Supplementary file 2 [file 8507d5b30ce343a1142fb4a8.xlsx]

## Sheet: Sheet1
molecule	cmpdname	cid	isomeric_smiles	pIC50
C_001	2,4-Thiazolidinedione	5437	C1C(=O)NC(=O)S1	6.26761
C_002	Methyl acetoacetate	7757	CC(=O)CC(=O)OC	4.72125
C_003	Diethyl malonate	7761	CCOC(=O)CC(=O)OCC	5.30103
C_004	Precose	41774	C[C@@H]1[C@H]([C@@H]([C@H]([C@H](O1)O[C@@H]2[C@H](O[C@@H]([C@@H]([C@H]2O)O)O[C@@H]3[C@H](OC([C@@H]([C@H]3O)O)O)CO)CO)O)O)N[C@H]4C=C([C@H]([C@@H]([C@H]4O)O)O)CO	5.69897
C_005	Miglustat	51634	CCCCN1C[C@@H]([C@H]([C@@H]([C@H]1CO)O)O)O	5.67778
C_006	(-)-Catechin	73160	C1[C@H]([C@@H](OC2=CC(=CC(=C21)O)O)C3=CC(=C(C=C3)O)O)O	4.26922
C_007	N-Methyldeoxynojirimycin	92381	CN1C[C@@H]([C@H]([C@@H]([C@H]1CO)O)O)O	6.92082
C_008	5-(4-Nitrophenyl)-1,3,4-thiadiazol-2-amine	96637	C1=CC(=CC=C1C2=NN=C(S2)N)[N+](=O)[O-]	5.63827
C_009	Terphenyllin	100437	COC1=C(C(=C(C(=C1)C2=CC=C(C=C2)O)OC)O)C3=CC=C(C=C3)O	5.31966
C_010	Butyrolactone i	123740	CC(=CCC1=C(C=CC(=C1)C[C@@]2(C(=C(C(=O)O2)O)C3=CC=C(C=C3)O)C(=O)OC)O)C	4.84832
C_011	1H-Benzotriazole, 1-benzoyl-5,6-dichloro-	155893	C1=CC=C(C=C1)C(=O)N2C3=CC(=C(C=C3N=N2)Cl)Cl	5.4318
C_012	(2r,3r,5s,6r)-2,6-Bis(hydroxymethyl)piperidine-3,4,5-triol	159496	C([C@@H]1[C@H](C([C@H]([C@H](N1)CO)O)O)O)O	7.39794
C_013	Valiolamine	174312	C1[C@@H]([C@@H]([C@H]([C@@H]([C@]1(CO)O)O)O)O)N	5.65758
C_014	Migalastat	176077	C1[C@@H]([C@H]([C@H]([C@H](N1)CO)O)O)O	5.82391
C_015	5-(2,4-Dichlorophenyl)-1,3,4-thiadiazol-2-amine	182638	C1=CC(=C(C=C1Cl)Cl)C2=NN=C(S2)N	5.63827
C_016	3-Hydroxyterphenyllin	191796	COC1=C(C(=C(C(=C1)C2=CC=C(C=C2)O)OC)O)C3=CC(=C(C=C3)O)O	4.94692
C_017	Valienamine	193758	C1=C([C@H]([C@@H]([C@H]([C@H]1N)O)O)O)CO	4
C_018	(5,6-Dimethyl-1h-benzotriazol-1-yl)(phenyl)methanone	256338	CC1=CC2=C(C=C1C)N(N=N2)C(=O)C3=CC=CC=C3	5.46852
C_019	5-(3-Nitrophenyl)-1,3,4-thiadiazol-2-amine	256343	C1=CC(=CC(=C1)[N+](=O)[O-])C2=NN=C(S2)N	5.63827
C_020	Miglitol	441314	C1[C@@H]([C@H]([C@@H]([C@H](N1CCO)CO)O)O)O	5.4318
C_021	Voglibose	444020	C1[C@@H]([C@@H]([C@H]([C@@H]([C@]1(CO)O)O)O)O)NC(CO)CO	5.88606
C_022	1,4-Dideoxy-1,4-imino-d-arabinitol	451991	C1[C@H]([C@@H]([C@H](N1)CO)O)O	4.25964
C_024	1-Benzoyl-1H-benzotriazole	570059	C1=CC=C(C=C1)C(=O)N2C3=CC=CC=C3N=N2	5.27654
C_025	5-(4-Chlorophenyl)-1,3,4-thiadiazol-2-amine	668392	C1=CC(=CC=C1C2=NN=C(S2)N)Cl	5.63827
C_026	2-(Benzotriazol-1-yl)-1-(4-chlorophenyl)ethanone	677475	C1=CC=C2C(=C1)N=NN2CC(=O)C3=CC=C(C=C3)Cl	5.60206
C_027	Benzotriazol-1-yl-(4-bromo-phenyl)-methanone	693001	C1=CC=C2C(=C1)N=NN2C(=O)C3=CC=C(C=C3)Br	5.49485
C_028	Benzotriazol-1-yl-(4-methoxyphenyl)methanone	710644	COC1=CC=C(C=C1)C(=O)N2C3=CC=CC=C3N=N2	5.52433
C_029	Benzotriazol-1-yl-(4-nitrophenyl)methanone	710799	C1=CC=C2C(=C1)N=NN2C(=O)C3=CC=C(C=C3)[N+](=O)[O-]	5.52724
C_030	2-(1H-1,2,3-Benzotriazol-1-yl)-1-phenylethan-1-one	761839	C1=CC=C(C=C1)C(=O)CN2C3=CC=CC=C3N=N2	5.30892
C_031	2-(Benzotriazol-1-yl)-1-(4-bromophenyl)ethanone	761840	C1=CC=C2C(=C1)N=NN2CC(=O)C3=CC=C(C=C3)Br	5.5544
C_032	2-Benzotriazol-1-yl-1-p-tolyl-ethanone	761841	CC1=CC=C(C=C1)C(=O)CN2C3=CC=CC=C3N=N2	5.32057
C_033	(1H-Benzo[d][1,2,3]triazol-1-yl)(3-methyl-4-nitrophenyl)methanone	764214	CC1=C(C=CC(=C1)C(=O)N2C3=CC=CC=C3N=N2)[N+](=O)[O-]	5.38722
C_034	Benzotriazol-1-yl-(2,6-difluoro-phenyl)-methanone	772214	C1=CC=C2C(=C1)N=NN2C(=O)C3=C(C=CC=C3F)F	5.2815
C_035	1-(4-Fluorobenzoyl)-1H-benzotriazole	785793	C1=CC=C2C(=C1)N=NN2C(=O)C3=CC=C(C=C3)F	5.54975
C_036	1H-Benzotriazol-1-yl(3,4-dimethylphenyl)methanone	789010	CC1=C(C=C(C=C1)C(=O)N2C3=CC=CC=C3N=N2)C	5.31876
C_037	2-(1H-1,2,3-Benzotriazol-1-yl)-1-(4-phenylphenyl)ethan-1-one	795004	C1=CC=C(C=C1)C2=CC=C(C=C2)C(=O)CN3C4=CC=CC=C4N=N3	5.30277
C_038	Benzotriazol-1-yl-(3-methylphenyl)methanone	834536	CC1=CC(=CC=C1)C(=O)N2C3=CC=CC=C3N=N2	5.35458
C_039	1-(2-Methoxybenzoyl)-1H-1,2,3-benzotriazole	898930	COC1=CC=CC=C1C(=O)N2C3=CC=CC=C3N=N2	5.31966
C_040	4-(5-Amino-[1,3,4]thiadiazol-2-yl)-phenol	936815	C1=CC(=CC=C1C2=NN=C(S2)N)O	5.63827
C_041	2-Benzotriazolyl-1-(3-nitrophenyl)ethan-1-one	2168077	C1=CC=C2C(=C1)N=NN2CC(=O)C3=CC(=CC=C3)[N+](=O)[O-]	5.39794
C_042	(3Z)-3-[2-[4-(4-Chlorophenyl)-2-thiazolyl]hydrazono]-1H-indole-2(3H)-one	2814554	C1=CC=C2C(=C1)C(=C(N2)O)N=NC3=NC(=CS3)C4=CC=C(C=C4)Cl	5.27572
C_043	3,3-Bis(1H-indole-3-yl)-2-indolinone	2883607	C1=CC=C2C(=C1)C(=CN2)C3(C4=CC=CC=C4NC3=O)C5=CNC6=CC=CC=C65	5.22915
C_044	5-Chloro-3,3-bis(1H-indole-3-yl)indoline-2-one	2948971	C1=CC=C2C(=C1)C(=CN2)C3(C4=C(C=CC(=C4)Cl)NC3=O)C5=CNC6=CC=CC=C65	5.22915
C_045	3,3-Bis(1-methyl-1H-indole-3-yl)-1H-indole-2(3H)-one	2949282	CN1C=C(C2=CC=CC=C21)C3(C4=CC=CC=C4NC3=O)C5=CN(C6=CC=CC=C65)C	5.22915
C_046	Chembl4470451	3438551	CCN1C2=C(C=C(C=C2)NC(=O)CSC3=NC4=CC=CC=C4N3)C5=CC=CC=C51	6.76955
C_047	2-(Benzotriazol-1-yl)-1-(4-methoxyphenyl)ethanone	3812150	COC1=CC=C(C=C1)C(=O)CN2C3=CC=CC=C3N=N2	5.34679
C_048	Chembl4444070	3846838	COC1=C(C=C(C=C1)Br)C2=NN=C(S2)N	5.63827
C_049	(3E)-3-{(2E)-[4-(4-Methylphenyl)-1,3-thiazol-2(3H)-ylidene]hydrazinylidene}-1,3-dihydro-2H-indol-2-one	4284022	CC1=CC=C(C=C1)C2=CSC(=N2)N=NC3=C(NC4=CC=CC=C43)O	5.27572
C_050	5-(2-Nitrophenyl)-1,3,4-thiadiazol-2-amine	4351712	C1=CC=C(C(=C1)C2=NN=C(S2)N)[N+](=O)[O-]	5.63827
C_051	5-(2,3-Dimethoxy-phenyl)-[1,3,4]thiadiazol-2-ylamine	4366058	COC1=CC=CC(=C1OC)C2=NN=C(S2)N	5.63827
C_052	Chembl4465201	4596212	CCCCCCCCCCCC(=O)N=NC1=C(NC2=CC=CC=C21)O	5.65758
C_053	Chembl4466646	4936110	CCCCOC1=CC=C(C=C1)C(=O)N2C3=CC=CC=C3N=N2	5.25181
C_054	Chembl4451791	5158729	CC1=CC=C(C=C1)C(=O)N=NC2=C(NC3=C2C=C(C=C3)Cl)O	5.65758
C_055	Quercetin	5280343	C1=CC(=C(C=C1C2=C(C(=O)C3=C(C=C(C=C3O2)O)O)O)O)O	5.10791
C_056	Genistein	5280961	C1=CC(=CC=C1C2=COC3=CC(=CC(=C3C2=O)O)O)O	5.58336
C_057	alpha-Mangostin	5281650	CC(=CCC1=C(C2=C(C=C1O)OC3=C(C2=O)C(=C(C(=C3)O)OC)CC=C(C)C)O)C	5.24413
C_058	7-Geranyloxy-1,3-dihydroxyxanthone	5317563	CC(=CCC/C(=C/COC1=CC2=C(C=C1)OC3=CC(=CC(=C3C2=O)O)O)/C)C	4.68613
C_059	7,8-Dihydroxy-4-methylcoumarin	5355836	CC1=CC(=O)OC2=C1C=CC(=C2O)O	4.284
C_060	gamma-Mangostin	5464078	CC(=CCC1=C(C2=C(C=C1O)OC3=C(C2=O)C(=C(C(=C3)O)O)CC=C(C)C)O)C	5.76955
C_061	beta-Mangostin	5495925	CC(=CCC1=C(C=C2C(=C1O)C(=O)C3=C(O2)C=C(C(=C3CC=C(C)C)OC)O)OC)C	4.64589
C_062	9-Hydroxycalabaxanthone	5495929	CC(=CCC1=C(C(=CC2=C1C(=O)C3=C(C4=C(C=C3O2)OC(C=C4)(C)C)O)O)OC)C	4.9431
C_063	Chembl4592051	6407588	CC1=CC=C(C=C1)C2=CSC(=N2)NC(=O)CSC3=NC(=C(N=N3)C4=CC=CC=C4)C5=CC=CC=C5	5.55284
C_064	2-[(5,6-Diphenyl-1,2,4-triazin-3-yl)sulfanyl]-N-(4-phenyl-1,3-thiazol-2-yl)acetamide	6411033	C1=CC=C(C=C1)C2=CSC(=N2)NC(=O)CSC3=NC(=C(N=N3)C4=CC=CC=C4)C5=CC=CC=C5	5.55284
C_065	Chembl4566821	6415895	C1=CC=C(C=C1)C2=C(N=NC(=N2)SCC(=O)NC3=NC(=CS3)C4=CC=C(C=C4)F)C5=CC=CC=C5	5.55284
C_066	Salacinol	6451151	C1[C@H]([C@@H]([C@H]([S+]1C[C@H]([C@H](CO)OS(=O)(=O)[O-])O)CO)O)O	5.3098
C_069	(2R,3R,5S,6R)-1-Butyl-2,6-bis(hydroxymethyl)piperidine-3,4,5-triol	6475031	CCCCN1[C@@H]([C@H](C([C@H]([C@H]1CO)O)O)O)CO	5.37675
C_070	2,6-Bis-hydroxymethyl-1-methyl-piperidine-3,4,5-triol	6477160	CN1[C@@H]([C@H](C([C@H]([C@H]1CO)O)O)O)CO	7.22185
C_071	2-Oxo-N'-[(E)-phenylmethylidene]-2H-chromene-3-carbohydrazide	6870730	C1=CC=C(C=C1)/C=N/NC(=O)C2=CC3=CC=CC=C3OC2=O	5.95861
C_072	1,3,4-Thiadiazol-2-amine, 5-[4-(dimethylamino)phenyl]-	7479831	CN(C)C1=CC=C(C=C1)C2=NN=C(S2)N	5.63827
C_073	Chembl4515560	9689210	C1=CC=C2C(=C1)C=C(N2)C(=O)N/N=C/C3=CC=C(C=C3)Cl	5.63827
C_074	AMP-Deoxynojirimycin	9822159	C1[C@@H]([C@H]([C@@H]([C@H](N1CCCCCOCC23CC4CC(C2)CC(C4)C3)CO)O)O)O	5.52288
C_075	Methyl (2~{r})-3-(4-Hydroxyphenyl)-2-[(4-Hydroxyphenyl)methyl]-4-Oxidanyl-5-Oxidanylidene-Furan-2-Carboxylate	10405953	COC(=O)[C@]1(C(=C(C(=O)O1)O)C2=CC=C(C=C2)O)CC3=CC=C(C=C3)O	4.06992
C_076	3,3''-Dihydroxyterphenyllin	10429220	COC1=C(C(=C(C(=C1)C2=CC(=C(C=C2)O)O)OC)O)C3=CC(=C(C=C3)O)O	4.85387
C_077	2-Benzylidene-6-(4-hydroxy-benzylidene)-cyclohexanone	10589581	C1C/C(=C\C2=CC=CC=C2)/C(=O)/C(=C/C3=CC=C(C=C3)O)/C1	4.37366
C_078	1,3,7-Trihydroxy-2,4-diisoprenylxanthone	10643491	CC(=CCC1=C(C(=C2C(=C1O)C(=O)C3=C(O2)C=CC(=C3)O)CC=C(C)C)O)C	4.59346
C_079	4-Methyl-2-pyridin-4-yl-1H-benzimidazole	10656015	CC1=C2C(=CC=C1)NC(=N2)C3=CC=NC=C3	5.27572
C_080	2-(2-Chlorophenyl)-4-methyl-1H-benzimidazole	11160865	CC1=C2C(=CC=C1)NC(=N2)C3=CC=CC=C3Cl	5.27572
C_081	4-Methyl-2-(2-nitrophenyl)-benzimidazole	11218984	CC1=C2C(=CC=C1)NC(=N2)C3=CC=CC=C3[N+](=O)[O-]	5.27572
C_082	Valibose	11630203	C1[C@@H]([C@H]([C@@H]([C@H]([C@H]1NC(CO)CO)O)O)O)CO	6.25964
C_083	Cochinchinone A	11633740	CC(=CCC/C(=C/CC1=C2C(=C(C(=C1O)CC=C(C)C)O)C(=O)C3=C(O2)C=CC(=C3)O)/C)C	4.75945
C_084	14-Deoxy-11,12-didehydro-15-p-methoxylbenzylideneandrographolide	11640963	C[C@@]12CC[C@H]([C@@]([C@H]1CCC(=C)[C@H]2/C=C/C3=C/C(=C/C4=CC=C(C=C4)OC)/OC3=O)(C)CO)O	4.79588
C_085	1-[(2S,3S)-2,3,4-Trihydroxybutyl]-3beta,4alpha-dihydroxy-5beta-(hydroxymethyl)thiolane-1-ium	11748894	C1[C@H]([C@@H]([C@H]([S+]1C[C@H]([C@H](CO)O)O)CO)O)O	5.04576
C_086	Cowanin	11754819	CC(=CCC/C(=C/CC1=C(C(=CC2=C1C(=O)C3=C(O2)C=C(C(=C3O)CC=C(C)C)O)O)OC)/C)C	4.42713
C_087	3,3-Bis(1H-indole-3-yl)-5-bromo-2-indolinone	11775074	C1=CC=C2C(=C1)C(=CN2)C3(C4=C(C=CC(=C4)Br)NC3=O)C5=CNC6=CC=CC=C65	5.22915
C_088	Chembl4473482	13397330	C1=CC=C(C=C1)C2=C(N=NC(=N2)SCC(=O)NC3=NC(=CS3)C4=CC=C(C=C4)Cl)C5=CC=CC=C5	5.55284
C_089	Chembl4566850	14356503	CC1=CC=C(C=C1)/C=N/NC(=O)C2=CC3=CC=CC=C3OC2=O	5.95861
C_090	Chembl4165370	14356507	COC1=CC=C(C=C1)/C=N/NC(=O)C2=CC3=CC=CC=C3OC2=O	5.95861
C_091	Chembl4513806	16095414	C1=CC=C(C=C1)C(=O)C[C@@H](C2=CC=C(C=C2)Cl)C3=CNC4=CC=CC=C43	5.36653
C_092	(3S)-3-(1H-Indol-3-yl)-1,3-diphenylpropan-1-one	16095545	C1=CC=C(C=C1)[C@H](CC(=O)C2=CC=CC=C2)C3=CNC4=CC=CC=C43	5.36653
C_093	Chembl4525900	16095547	COC1=CC=C(C=C1)[C@H](CC(=O)C2=CC=CC=C2)C3=CNC4=CC=CC=C43	5.36653
C_094	15-Benzylidene-14-deoxy-11,12-didehydroandrographolide	16121613	C[C@@]12CC[C@H]([C@@]([C@H]1CCC(=C)[C@H]2/C=C/C3=C/C(=C/C4=CC=CC=C4)/OC3=O)(C)CO)O	4.23657
C_095	15-(Benzo[1,3]dioxole-5-methanylidene)-14-deoxy-11,12-didehydroandrographolide	16121614	C[C@@]12CC[C@H]([C@@]([C@H]1CCC(=C)[C@H]2/C=C/C3=C/C(=C/C4=CC5=C(C=C4)OCO5)/OC3=O)(C)CO)O	4.08619
C_096	Chembl4472969	16386607	C1=CC=C2C(=C1)N=CN2C3=CC=C(C=C3)/C=C/4\C(=O)NC(=O)S4	6.25964
C_097	Chembl4466501	17603805	C1=CC=C2C(=C1)C=C3C=CC=CC3=C2C4=NN=C(S4)N	5.63827
C_098	Chembl4468056	17603827	C1=CC=C(C=C1)COC2=CC=C(C=C2)C3=NN=C(S3)N	5.63827
C_099	(1R,3S,6R)-4-Hydroxymethyl-6-octylamino-cyclohex-4-ene-1,2,3-triol	21021619	CCCCCCCCNC1C=C(C(C(C1O)O)O)CO	4.76955
C_100	2-(4-Fluorophenyl)-4-methyl-1H-1,3-benzodiazole	21682292	CC1=C2C(=CC=C1)NC(=N2)C3=CC=C(C=C3)F	5.27572
C_101	Chembl4209575	23538861	CC(=CCOC1=CC=C(C=C1)C2=C(C=C(C(=C2O)OC)C3=CC=C(C=C3)O)OC)C	4.75696
C_102	Prenylterphenyllin	23630784	CC(=CCC1=C(C=CC(=C1)C2=C(C=C(C(=C2O)OC)C3=CC=C(C=C3)O)OC)O)C	4.59007
C_103	Chembl4544393	23793555	COC1=CC=C(C=C1)C2=CSC(=N2)NC(=O)CSC3=NC(=C(N=N3)C4=CC=CC=C4)C5=CC=CC=C5	5.55284
C_104	Chembl4435535	24796417	C1=CC(=CC=C1/C=N/C2=NN=C(S2)C3=CC=C(C=C3)Cl)[N+](=O)[O-]	5.63827
C_105	3,3-Bis(1H-indole-3-yl)-5-methyl-2-indolinone	24873940	CC1=CC2=C(C=C1)NC(=O)C2(C3=CNC4=CC=CC=C43)C5=CNC6=CC=CC=C65	5.22915
C_106	Aspernolide A	25265784	CC1(CCC2=C(O1)C=CC(=C2)C[C@@]3(C(=C(C(=O)O3)O)C4=CC=C(C=C4)O)C(=O)OC)C	4.32486
C_108	(1R,3S,6R)-6-Hexylamino-4-hydroxymethyl-cyclohex-4-ene-1,2,3-triol	44384057	CCCCCCNC1C=C(C(C(C1O)O)O)CO	4.30103
C_109	(S)-3-(2-((4Ar,6aS,7R,10aS,10bR)-3-(3-bromophenyl)-6a,10b-dimethyl-8-methylene-decahydro-1H-naphtho[2,1-d][1,3]dioxin-7-yl)ethylidene)-4-hydroxy-dihydrofuran-2(3H)-one	44411113	C[C@@]12CC[C@@H]3[C@]([C@H]1CCC(=C)[C@H]2C/C=C/4\[C@@H](COC4=O)O)(COC(O3)C5=CC(=CC=C5)Br)C	4
C_110	3-(2-((1R,4As,5R,6R,8aR)-6-hydroxy-5-(hydroxymethyl)-5,8a-dimethyl-2-methylene-decahydronaphthalen-1-yl)vinyl)-5-(3-phenylallylidene)furan-2(5H)-one	44411422	C[C@@]12CC[C@H]([C@@]([C@H]1CCC(=C)[C@H]2/C=C/C3=C/C(=C/C=C/C4=CC=CC=C4)/OC3=O)(C)CO)O	4.23657
C_111	14-Deoxy-11,12-didehydro-15-trimethoxylbenzylideneandrographolide	44437482	C[C@@]12CC[C@H]([C@@]([C@H]1CCC(=C)[C@H]2/C=C/C3=C/C(=C/C4=CC(=C(C=C4OC)OC)OC)/OC3=O)(C)CO)O	4.07572
C_112	14-Deoxy-15-(p-(dimethanylamino)-benzylidene)-11,12-didehydroandrographolide	44437483	C[C@@]12CC[C@H]([C@@]([C@H]1CCC(=C)[C@H]2/C=C/C3=C/C(=C/C4=CC=C(C=C4)N(C)C)/OC3=O)(C)CO)O	4.1549
C_113	14-Deoxy-11,12-didehydro-15-(-2-furanmethanylidene)-andrographolide	44437486	C[C@@]12CC[C@H]([C@@]([C@H]1CCC(=C)[C@H]2/C=C/C3=C/C(=C/C4=CC=CO4)/OC3=O)(C)CO)O	4
C_114	[(1R,2R,4Ar,5R,8aS)-1,4a-dimethyl-6-methylidene-5-[(E)-2-[(5E)-5-[(2E,7E)-2-methylnona-2,7-dienylidene]-2-oxofuran-3-yl]ethenyl]-2-(pyridine-3-carbonyloxy)-3,4,5,7,8,8a-hexahydro-2H-naphthalen-1-yl]methyl pyridine-3-carboxylate	44437487	C/C=C/CCC/C=C(\C)/C=C/1\C=C(C(=O)O1)/C=C/[C@@H]2C(=C)CC[C@H]3[C@]2(CC[C@H]([C@@]3(C)COC(=O)C4=CN=CC=C4)OC(=O)C5=CN=CC=C5)C	4.55284
C_115	15-Benzylidene14-deoxy-11,12-didehydro-3,19-dinicotinateandrographolide	44437488	C[C@@]12CC[C@H]([C@@]([C@H]1CCC(=C)[C@H]2/C=C/C3=C/C(=C\C4=CC=CC=C4)/OC3=O)(C)COC(=O)C5=CN=CC=C5)OC(=O)C6=CN=CC=C6	4.79588
C_116	[(1R,2R,4Ar,5R,8aS)-5-[(E)-2-[(5E)-5-[(4-chlorophenyl)methylidene]-2-oxofuran-3-yl]ethenyl]-1,4a-dimethyl-6-methylidene-2-(pyridine-3-carbonyloxy)-3,4,5,7,8,8a-hexahydro-2H-naphthalen-1-yl]methyl pyridine-3-carboxylate	44437489	C[C@@]12CC[C@H]([C@@]([C@H]1CCC(=C)[C@H]2/C=C/C3=C/C(=C\C4=CC=C(C=C4)Cl)/OC3=O)(C)COC(=O)C5=CN=CC=C5)OC(=O)C6=CN=CC=C6	5.22185
C_117	[(1R,2R,4Ar,5R,8aS)-5-[(E)-2-[(5E)-5-[(3-bromophenyl)methylidene]-2-oxofuran-3-yl]ethenyl]-1,4a-dimethyl-6-methylidene-2-(pyridine-3-carbonyloxy)-3,4,5,7,8,8a-hexahydro-2H-naphthalen-1-yl]methyl pyridine-3-carboxylate	44437490	C[C@@]12CC[C@H]([C@@]([C@H]1CCC(=C)[C@H]2/C=C/C3=C/C(=C\C4=CC(=CC=C4)Br)/OC3=O)(C)COC(=O)C5=CN=CC=C5)OC(=O)C6=CN=CC=C6	4.85387
C_118	[(1R,2R,4Ar,5R,8aS)-5-[(E)-2-[(5E)-5-[[4-(dimethylamino)phenyl]methylidene]-2-oxofuran-3-yl]ethenyl]-1,4a-dimethyl-6-methylidene-2-(pyridine-3-carbonyloxy)-3,4,5,7,8,8a-hexahydro-2H-naphthalen-1-yl]methyl pyridine-3-carboxylate	44437491	C[C@@]12CC[C@H]([C@@]([C@H]1CCC(=C)[C@H]2/C=C/C3=C/C(=C\C4=CC=C(C=C4)N(C)C)/OC3=O)(C)COC(=O)C5=CN=CC=C5)OC(=O)C6=CN=CC=C6	4.60206
C_119	[(1R,2R,4Ar,5R,8aS)-5-[(E)-2-[(5Z)-5-(furan-2-ylmethylidene)-2-oxofuran-3-yl]ethenyl]-1,4a-dimethyl-6-methylidene-2-(pyridine-3-carbonyloxy)-3,4,5,7,8,8a-hexahydro-2H-naphthalen-1-yl]methyl pyridine-3-carboxylate	44437492	C[C@@]12CC[C@H]([C@@]([C@H]1CCC(=C)[C@H]2/C=C/C3=C/C(=C/C4=CC=CO4)/OC3=O)(C)COC(=O)C5=CN=CC=C5)OC(=O)C6=CN=CC=C6	4.4437
C_120	[(1R,2R,4Ar,5R,8aS)-5-[(E)-2-[(5E)-5-[(4-methoxyphenyl)methylidene]-2-oxofuran-3-yl]ethenyl]-1,4a-dimethyl-6-methylidene-2-(pyridine-3-carbonyloxy)-3,4,5,7,8,8a-hexahydro-2H-naphthalen-1-yl]methyl pyridine-3-carboxylate	44437493	C[C@@]12CC[C@H]([C@@]([C@H]1CCC(=C)[C@H]2/C=C/C3=C/C(=C\C4=CC=C(C=C4)OC)/OC3=O)(C)COC(=O)C5=CN=CC=C5)OC(=O)C6=CN=CC=C6	4.95861
C_122	Chembl4214309	51042112	CC(=CCC/C(=C/COC1=C(C(=C2C(=C1)OC3=C(C2=O)C=C(C=C3)O)O)CC=C(C)C)/C)C	4.54668
C_123	Chembl4549420	53375223	C1=CC=C2C(=C1)C=C(C(=O)O2)C(=O)N/N=C/C3=CC=CC=C3[N+](=O)[O-]	5.95861
C_124	(2R,3S,4S)-1-[(2S,3S)-3-Ethoxy-2,4-dihydroxybutyl]-2-(hydroxymethyl)thiolan-1-ium-3,4-diol;chloride	54580834	CCO[C@@H](CO)[C@@H](C[S+]1C[C@H]([C@@H]([C@H]1CO)O)O)O.[Cl-]	6.01773
C_125	(5S,8R,9S,10S,13S,14S,17S)-17-Hydroxy-10,13-dimethyl-1,2,4,5,6,7,8,9,11,12,14,15,16,17-tetradecahydrocyclopenta[a]phenanthren-3-one;(8R,9S,10S,13S,14S,17S)-17-hydroxy-10,13-dimethyl-1,2,4,5,6,7,8,9,11,12,14,15,16,17-tetradecahydrocyclopenta[a]phenanthren-3-one	54584900	C[C@]12CCC(=O)C[C@@H]1CC[C@@H]3[C@@H]2CC[C@]4([C@H]3CC[C@@H]4O)C.C[C@]12CC[C@H]3[C@H]([C@@H]1CC[C@@H]2O)CCC4[C@@]3(CCC(=O)C4)C	4
C_126	(2R,3S,4S)-1-[(2S,3S)-2,4-Dihydroxy-3-tridecoxybutyl]-2-(hydroxymethyl)thiolan-1-ium-3,4-diol;chloride	54586701	CCCCCCCCCCCCCO[C@@H](CO)[C@@H](C[S+]1C[C@H]([C@@H]([C@H]1CO)O)O)O.[Cl-]	5.95861
C_127	(2R,3S,4S)-1-[(2S,3S)-2,4-Dihydroxy-3-methoxybutyl]-2-(hydroxymethyl)thiolan-1-ium-3,4-diol;chloride	54587740	CO[C@@H](CO)[C@@H](C[S+]1C[C@H]([C@@H]([C@H]1CO)O)O)O.[Cl-]	5.69897
C_128	Chembl4579201	54941384	CC1=C2C(=CC=C1)NC(=N2)C3=CC(=CC=C3)O	5.27572
C_129	2-(2-Fluorophenyl)-4-methyl-1h-benzimidazole	59018257	CC1=C2C(=CC=C1)NC(=N2)C3=CC=CC=C3F	5.27572
C_130	2-(4-Chlorophenyl)-4-methyl-1H-benzimidazole	59018388	CC1=C2C(=CC=C1)NC(=N2)C3=CC=C(C=C3)Cl	5.27572
C_131	(2R,3S,4S)-1-[(2S,3S)-2,4-Dihydroxy-3-[(2-nitrophenyl)methoxy]butyl]-2-(hydroxymethyl)thiolan-1-ium-3,4-diol;chloride	60201905	C1[C@H]([C@@H]([C@H]([S+]1C[C@H]([C@H](CO)OCC2=CC=CC=C2[N+](=O)[O-])O)CO)O)O.[Cl-]	6.82391
C_132	Chembl4567754	60646299	CC1=C2C(=CC=C1)NC(=N2)C3=CC=CS3	5.27572
C_133	2-(3-Chlorophenyl)-4-methyl-1H-1,3-benzodiazole	60646448	CC1=C2C(=CC=C1)NC(=N2)C3=CC(=CC=C3)Cl	5.27572
C_134	2-(3-Fluorophenyl)-4-methyl-1H-1,3-benzodiazole	60646537	CC1=C2C(=CC=C1)NC(=N2)C3=CC(=CC=C3)F	5.27572
C_135	Chembl4585914	60746809	C1=CC=C2C(=C1)N=NN2CC(=O)C3=CC(=CC=C3)Br	5.5544
C_136	Chembl4567315	60747003	C1=CC=C2C(=C1)N=NN2CC(=O)C3=CC(=C(C=C3)Cl)Cl	5.40894
C_137	(1S,2S,3R,6S)-6-[[(2R,3S,4S,5R,6S)-4,5-Dihydroxy-6-methoxy-2-methyloxan-3-yl]amino]-4-(hydroxymethyl)cyclohex-4-ene-1,2,3-triol	70682078	C[C@@H]1[C@H]([C@@H]([C@H]([C@H](O1)OC)O)O)N[C@H]2C=C([C@H]([C@@H]([C@H]2O)O)O)CO	5.49485
C_138	(1S,2S,3R,6S)-6-[[(2S,3S,4S,5R,6S)-4,5-Dihydroxy-2-(hydroxymethyl)-6-methoxyoxan-3-yl]amino]-4-(hydroxymethyl)cyclohex-4-ene-1,2,3-triol	70684192	CO[C@@H]1[C@@H]([C@H]([C@@H]([C@H](O1)CO)N[C@H]2C=C([C@H]([C@@H]([C@H]2O)O)O)CO)O)O	5.14267
C_139	(1S,2S,3R,4S,5S)-5-[[(2R,3R,4S,5R,6S)-4,5-Dihydroxy-6-methoxy-2-methyloxan-3-yl]amino]-1-(hydroxymethyl)cyclohexane-1,2,3,4-tetrol	70688441	C[C@@H]1[C@@H]([C@@H]([C@H]([C@H](O1)OC)O)O)N[C@H]2C[C@@]([C@H]([C@@H]([C@H]2O)O)O)(CO)O	6.18709
C_140	(1S,2S,3R,4S,5S)-1-(Hydroxymethyl)-5-[[(1S,2S,3S,4S,6S)-2,3,4-trihydroxy-6-methylcyclohexyl]amino]cyclohexane-1,2,3,4-tetrol	70688442	C[C@H]1C[C@@H]([C@@H]([C@H]([C@H]1N[C@H]2C[C@@]([C@H]([C@@H]([C@H]2O)O)O)(CO)O)O)O)O	7.16749
C_141	(1S,2S,3R,4S,5S)-5-[[(1S,2S,3S,4S,6S)-4-Amino-2,3-dihydroxy-6-methylcyclohexyl]amino]-1-(hydroxymethyl)cyclohexane-1,2,3,4-tetrol	70688446	C[C@H]1C[C@@H]([C@@H]([C@H]([C@H]1N[C@H]2C[C@@]([C@H]([C@@H]([C@H]2O)O)O)(CO)O)O)O)N	5.82391
C_144	(1S,2S,3R,4S,5S)-5-[[(2S,3R,4S,5R,6S)-4,5-Dihydroxy-2-(hydroxymethyl)-6-methoxyoxan-3-yl]amino]-1-(hydroxymethyl)cyclohexane-1,2,3,4-tetrol	70692637	CO[C@@H]1[C@@H]([C@H]([C@H]([C@H](O1)CO)N[C@H]2C[C@@]([C@H]([C@@H]([C@H]2O)O)O)(CO)O)O)O	7
C_149	(1Z,4E)-5-(3,4-Dihydroxyphenyl)-1-hydroxy-1-(2-hydroxyphenyl)penta-1,4-dien-3-one	71569087	C1=CC=C(C(=C1)/C(=C/C(=O)/C=C/C2=CC(=C(C=C2)O)O)/O)O	4.84466
C_150	1-Hydroxymethyl-5-(2-hydroxy-1-phenyl-ethylamino)-cyclohexane-1,2,3,4-tetraol	73347264	C1[C@@H]([C@@H]([C@H]([C@@H]([C@]1(CO)O)O)O)O)N[C@H](CO)C2=CC=CC=C2	4.46852
C_151	1-Hydroxymethyl-5-(2-hydroxy-2-phenyl-ethylamino)-cyclohexane-1,2,3,4-tetraol	73350356	C1[C@@H]([C@@H]([C@@H]([C@H]([C@]1(CO)O)O)O)O)NC[C@@H](C2=CC=CC=C2)O	8.23657
C_154	Chembl4238409	78168139	CCC1C(C(C(C(N1)CC)O)O)O	5
C_155	Chembl4550935	78908128	CC1=C2C(=CC=C1)NC(=N2)C3=CC(=C(C=C3)OC)O	5.27572
C_156	Chembl4449615	84410102	CC1=CC2=C(C=C1C)N(N=N2)CC(=O)C3=CC=C(C=C3)Cl	5.65561
C_157	Chembl4443687	84410550	CC1=CC2=C(C=C1C)N(N=N2)CC(=O)C3=CC=CC=C3	5.46725
C_158	Chembl4237960	89495334	C1=CN(C(=O)N=C1N)C2[C@@H]([C@@H](C(O2)CO)O)O	5.60206
C_159	Chembl4451474	101671063	CC(=CCC/C(=C/CC1=C(C(=CC2=C1C(=O)C3=C(O2)C=C(C(=C3O)C/C=C(\C)/CO)O)O)OC)/C)C	4.54212
C_160	5-(2-Hydroxy-cyclohexylamino)-1-hydroxymethyl-cyclohexane-1,2,3,4-tetraol	101872894	C1CC[C@H]([C@@H](C1)N[C@H]2C[C@@]([C@H]([C@@H]([C@H]2O)O)O)(CO)O)O	8.21467
C_161	(2R)-1-[4,4-Difluoro-5-(1,1'-biphenyl-4-ylmethoxy)pentyl]-2alpha-(hydroxymethyl)piperidine-3beta,4alpha,5beta-triol	101882899	C1[C@@H]([C@H]([C@@H]([C@H](N1CCCC(COCC2=CC=C(C=C2)C3=CC=CC=C3)(F)F)CO)O)O)O	5.04576
C_162	Cratoxylone	102004659	CC(=CCC1=C(C(=CC2=C1C(=O)C3=C(O2)C=C(C(=C3O)CCC(C)(C)O)O)O)OC)C	4.51286
C_163	Chembl4440152	102432416	CC1=CC=C(C=C1)[C@H](CC(=O)C2=CC3=CC=CC=C3C=C2)C4=CNC5=CC=CC=C54	5.36653
C_164	Chembl4439503	102432417	C1=CC=C(C=C1)[C@H](CC(=O)C2=CC3=CC=CC=C3C=C2)C4=CNC5=CC=CC=C54	5.36653
C_165	Chembl4202640	102519726	CC(=C)C(CC/C(=C/COC1=CC2=C(C=C1)OC3=CC(=CC(=C3C2=O)O)O)/C)O	4.86328
C_166	(2R,3R,4R,5S)-2-(Hydroxymethyl)-1-[5-[[4-phenyl-3-(trifluoromethyl)phenyl]methoxy]pentyl]piperidine-3,4,5-triol	118411068	C1[C@@H]([C@H]([C@@H]([C@H](N1CCCCCOCC2=CC(=C(C=C2)C3=CC=CC=C3)C(F)(F)F)CO)O)O)O	5.1549
C_167	(2R,3R,4R,5S)-2-(Hydroxymethyl)-1-[5-[[4-phenyl-2-(trifluoromethyl)phenyl]methoxy]pentyl]piperidine-3,4,5-triol	118411071	C1[C@@H]([C@H]([C@@H]([C@H](N1CCCCCOCC2=C(C=C(C=C2)C3=CC=CC=C3)C(F)(F)F)CO)O)O)O	5.09691
C_168	(2R,3R,4R,5S)-1-[5-[(2-Fluoro-4-phenylphenyl)methoxy]pentyl]-2-(hydroxymethyl)piperidine-3,4,5-triol	118411072	C1[C@@H]([C@H]([C@@H]([C@H](N1CCCCCOCC2=C(C=C(C=C2)C3=CC=CC=C3)F)CO)O)O)O	5.60206
C_169	(2R,3R,4R,5S)-2-(Hydroxymethyl)-1-[5-[(4-phenylphenyl)methoxy]pentyl]piperidine-3,4,5-triol	118411073	C1[C@@H]([C@H]([C@@H]([C@H](N1CCCCCOCC2=CC=C(C=C2)C3=CC=CC=C3)CO)O)O)O	5.69897
C_170	(2R,3R,4R,5S)-1-[5-[(3-Fluoro-4-phenylphenyl)methoxy]pentyl]-2-(hydroxymethyl)piperidine-3,4,5-triol	118411074	C1[C@@H]([C@H]([C@@H]([C@H](N1CCCCCOCC2=CC(=C(C=C2)C3=CC=CC=C3)F)CO)O)O)O	5.52288
C_171	(2R,3R,4R,5S)-2-(Hydroxymethyl)-1-[5-[(2-phenylphenyl)methoxy]pentyl]piperidine-3,4,5-triol	118411076	C1[C@@H]([C@H]([C@@H]([C@H](N1CCCCCOCC2=CC=CC=C2C3=CC=CC=C3)CO)O)O)O	5.82391
C_172	(1S,2S,3R,4S,5S)-5-[Bis(hydroxymethyl)amino]-1-(hydroxymethyl)cyclohexane-1,2,3,4-tetrol	118718367	C1[C@@H]([C@@H]([C@H]([C@@H]([C@]1(CO)O)O)O)O)N(CO)CO	7.82391
C_173	5-(Cyclohexylmethyl-amino)-1-hydroxymethyl-cyclohexane-1,2,3,4-tetraol	118718368	C1CCC(CC1)CN[C@H]2C[C@@]([C@H]([C@@H]([C@H]2O)O)O)(CO)O	6.61979
C_174	5-Cyclohexylamino-1-hydroxymethyl-cyclohexane-1,2,3,4-tetraol	118718369	C1CCC(CC1)N[C@H]2C[C@@]([C@H]([C@@H]([C@H]2O)O)O)(CO)O	6.38722
C_175	5-(4-Bromo-benzylamino)-1-hydroxymethyl-cyclohexane-1,2,3,4-tetraol	118718370	C1[C@@H]([C@@H]([C@H]([C@@H]([C@]1(CO)O)O)O)O)NCC2=CC=C(C=C2)Br	6.63827
C_176	6-(2-Hydroxy-1-hydroxymethyl-ethylamino)-4-hydroxymethyl-cyclohex-4-ene-1,2,3-triol	118718371	C1=C([C@H]([C@@H]([C@H]([C@H]1NC(CO)CO)O)O)O)CO	5.22915
C_177	1-Hydroxymethyl-5-phenethylamino-cyclohexane-1,2,3,4-tetraol	118718372	C1[C@@H]([C@@H]([C@H]([C@@H]([C@]1(CO)O)O)O)O)NCCC2=CC=CC=C2	7
C_178	5-(3,7-Dimethyl-octa-2,6-dienylamino)-1-hydroxymethyl-cyclohexane-1,2,3,4-tetraol	118718373	CC(=CCC/C(=C/CN[C@H]1C[C@@]([C@H]([C@@H]([C@H]1O)O)O)(CO)O)/C)C	6.284
C_180	1-Hydroxymethyl-5-[(thiophen-2-ylmethyl)-amino]-cyclohexane-1,2,3,4-tetraol	118718375	C1[C@@H]([C@@H]([C@H]([C@@H]([C@]1(CO)O)O)O)O)NCC2=CC=CS2	6.69897
C_181	5-(3,5-Di-tert-butyl-4-hydroxy-benzylamino)-1-hydroxymethyl-cyclohexane-1,2,3,4-tetraol	118718376	CC(C)(C)C1=CC(=CC(=C1O)C(C)(C)C)CN[C@H]2C[C@@]([C@H]([C@@H]([C@H]2O)O)O)(CO)O	7.36653
C_182	1-Hydroxymethyl-5-(3-phenyl-allylamino)-cyclohexane-1,2,3,4-tetraol	118718377	C1[C@@H]([C@@H]([C@H]([C@@H]([C@]1(CO)O)O)O)O)NC/C=C/C2=CC=CC=C2	6.56864
C_183	1-Hydroxymethyl-5-[(pyridin-3-ylmethyl)-amino]-cyclohexane-1,2,3,4-tetraol	118718379	C1[C@@H]([C@@H]([C@H]([C@@H]([C@]1(CO)O)O)O)O)NCC2=CN=CC=C2	6.48149
C_184	(2R,3R,4R,5S)-2-(Hydroxymethyl)-1-[5-[(3-phenylphenyl)methoxy]pentyl]piperidine-3,4,5-triol	118719919	C1[C@@H]([C@H]([C@@H]([C@H](N1CCCCCOCC2=CC(=CC=C2)C3=CC=CC=C3)CO)O)O)O	5.82391
C_185	(2R,3R,4R,5S)-2-(Hydroxymethyl)-1-[5-[(1S)-1-(4-phenylphenyl)ethoxy]pentyl]piperidine-3,4,5-triol	118720302	C[C@@H](C1=CC=C(C=C1)C2=CC=CC=C2)OCCCCCN3C[C@@H]([C@H]([C@@H]([C@H]3CO)O)O)O	5.60206
C_187	4-(1,3-Benzothiazol-2-yl)-N-[(Z)-pyridin-2-ylmethylideneamino]benzamide	118730249	C1=CC=C2C(=C1)N=C(S2)C3=CC=C(C=C3)C(=O)N/N=C\C4=CC=CC=N4	4.99012
C_188	4-(1,3-Benzothiazol-2-yl)-N-[(E)-thiophen-2-ylmethylideneamino]benzamide	118730252	C1=CC=C2C(=C1)N=C(S2)C3=CC=C(C=C3)C(=O)N/N=C/C4=CC=CS4	5.0716
C_189	4-(1,3-Benzothiazol-2-yl)-N-[(Z)-furan-2-ylmethylideneamino]benzamide	118730256	C1=CC=C2C(=C1)N=C(S2)C3=CC=C(C=C3)C(=O)N/N=C\C4=CC=CO4	4.89449
C_190	4-(1,3-Benzothiazol-2-yl)-N-[(E)-(4-nitrophenyl)methylideneamino]benzamide	118730261	C1=CC=C2C(=C1)N=C(S2)C3=CC=C(C=C3)C(=O)N/N=C/C4=CC=C(C=C4)[N+](=O)[O-]	4.57873
C_191	4-(1,3-Benzothiazol-2-yl)-N-[(E)-(4-fluorophenyl)methylideneamino]benzamide	118730263	C1=CC=C2C(=C1)N=C(S2)C3=CC=C(C=C3)C(=O)N/N=C/C4=CC=C(C=C4)F	5.14752
C_192	4-(1,3-Benzothiazol-2-yl)-N-[(E)-(3,5-dimethoxyphenyl)methylideneamino]benzamide	118730264	COC1=CC(=CC(=C1)/C=N/NC(=O)C2=CC=C(C=C2)C3=NC4=CC=CC=C4S3)OC	4.79129
C_193	4-(1,3-Benzothiazol-2-yl)-N-[(E)-benzylideneamino]benzamide	118730265	C1=CC=C(C=C1)/C=N/NC(=O)C2=CC=C(C=C2)C3=NC4=CC=CC=C4S3	5.0942
C_194	4-(1,3-Benzothiazol-2-yl)-N-[(E)-(3-bromo-4-fluorophenyl)methylideneamino]benzamide	118730266	C1=CC=C2C(=C1)N=C(S2)C3=CC=C(C=C3)C(=O)N/N=C/C4=CC(=C(C=C4)F)Br	4.55253
C_195	4-(1,3-Benzothiazol-2-yl)-N-[(E)-(4-methoxyphenyl)methylideneamino]benzamide	118730267	COC1=CC=C(C=C1)/C=N/NC(=O)C2=CC=C(C=C2)C3=NC4=CC=CC=C4S3	4.73684
C_196	4-(1,3-Benzothiazol-2-yl)-N-[(E)-(4-chlorophenyl)methylideneamino]benzamide	118730270	C1=CC=C2C(=C1)N=C(S2)C3=CC=C(C=C3)C(=O)N/N=C/C4=CC=C(C=C4)Cl	5.27491
C_197	4-(1,3-Benzothiazol-2-yl)-N-[(E)-(3-methoxyphenyl)methylideneamino]benzamide	118730271	COC1=CC=CC(=C1)/C=N/NC(=O)C2=CC=C(C=C2)C3=NC4=CC=CC=C4S3	4.95507
C_198	4-(1,3-Benzothiazol-2-yl)-N-[(E)-(3-hydroxyphenyl)methylideneamino]benzamide	118730272	C1=CC=C2C(=C1)N=C(S2)C3=CC=C(C=C3)C(=O)N/N=C/C4=CC(=CC=C4)O	5.03574
C_199	4-(1,3-Benzothiazol-2-yl)-N-[(E)-(3-hydroxy-2-iodo-4-methoxyphenyl)methylideneamino]benzamide	118730275	COC1=C(C(=C(C=C1)/C=N/NC(=O)C2=CC=C(C=C2)C3=NC4=CC=CC=C4S3)I)O	4.34872
C_200	4-(1,3-Benzothiazol-2-yl)-N-[(E)-(3,5-dihydroxyphenyl)methylideneamino]benzamide	118730277	C1=CC=C2C(=C1)N=C(S2)C3=CC=C(C=C3)C(=O)N/N=C/C4=CC(=CC(=C4)O)O	4.9539
C_201	Chembl4442533	118855492	C1=CC=C2C(=C1)C=C(N2)C(=O)N/N=C/C3=CC(=CC(=C3)O)O	5.63827
C_202	Chembl4533183	118855494	COC1=C(C=C(C=C1)/C=N/NC(=O)C2=CC3=CC=CC=C3N2)O	5.63827
C_203	Chembl4533603	118855496	COC1=C(C(=C(C=C1)/C=N/NC(=O)C2=CC3=CC=CC=C3N2)I)O	5.63827
C_204	Chembl4538234	119081250	COC1=CC=C(C=C1)/C=N/NC(=O)C2=NC(=CS2)C3=CC4=CC=CC=C4OC3=O	5.20761
C_205	Chembl4583678	119081260	C1=CC=C2C(=C1)C=C(C(=O)O2)C3=CSC(=N3)C(=O)N/N=C/C4=CC=C(C=C4)Cl	5.20761
C_206	Chembl4456697	119081261	C1=CC=C2C(=C1)C=C(C(=O)O2)C3=CSC(=N3)C(=O)N/N=C/C4=CC(=CC=C4)Cl	5.20761
C_207	Chembl4435153	119081262	C1=CC=C2C(=C1)C=C(C(=O)O2)C3=CSC(=N3)C(=O)N/N=C/C4=CC=C(C=C4)C(F)(F)F	5.20761
C_208	Chembl4521797	119081263	C1=CC=C2C(=C1)C=C(C(=O)O2)C3=CSC(=N3)C(=O)N/N=C/C4=CC=CC=C4F	5.20761
C_209	Chembl4453289	119081264	C1=CC=C2C(=C1)C=C(C(=O)O2)C3=CSC(=N3)C(=O)N/N=C/C4=CC(=CC=C4)Br	5.20761
C_210	Chembl4468721	119081265	COC1=CC=CC=C1/C=N/NC(=O)C2=NC(=CS2)C3=CC4=CC=CC=C4OC3=O	5.20761
C_211	Chembl4452388	121225769	C1=CC=C2C(=C1)C=C(C(=O)O2)C3=CSC(=N3)C(=O)N/N=C/C4=CC(=CC=C4)F	5.20761
C_212	N-[(E)-(4-Nitrophenyl)methylideneamino]-2-oxochromene-3-carboxamide	122181573	C1=CC=C2C(=C1)C=C(C(=O)O2)C(=O)N/N=C/C3=CC=C(C=C3)[N+](=O)[O-]	5.95861
C_213	[(3E)-3-[(3,4-Dihydroxyphenyl)methylidene]-2-hydroxycyclohexen-1-yl]-phenylmethanone	122185117	C1C/C(=C\C2=CC(=C(C=C2)O)O)/C(=C(C1)C(=O)C3=CC=CC=C3)O	4.38722
C_214	2-[4-(Trifluoromethyl)phenyl]-3-(1,4,5-triphenylimidazol-2-yl)-1H-indole	122191974	C1=CC=C(C=C1)C2=C(N(C(=N2)C3=C(NC4=CC=CC=C43)C5=CC=C(C=C5)C(F)(F)F)C6=CC=CC=C6)C7=CC=CC=C7	5.08092
C_215	Chembl4590962	126715487	CC1=CC=C(C=C1)[C@H](CC(=O)C2=CC=CC=C2)C3=CNC4=CC=CC=C43	5.36653
C_216	Chembl4441979	126715488	COC1=CC=C(C=C1)[C@H](CC(=O)C2=CC3=CC=CC=C3C=C2)C4=CNC5=CC=CC=C54	5.36653
C_217	Chembl4456998	126715493	C1=CC=C(C=C1)C(=O)C[C@@H](C2=CC=CS2)C3=CNC4=CC=CC=C43	5.36653
C_218	Chembl4473090	126715501	C1=CC=C2C=C(C=CC2=C1)C(=O)C[C@@H](C3=CC=C(C=C3)Cl)C4=CNC5=CC=CC=C54	5.36653
C_219	Chembl4445238	126962135	C1=CC=C(C=C1)CN2C=C(C3=CC=CC=C32)C4(C5=CC=CC=C5NC4=O)C6=CN(C7=CC=CC=C76)CC8=CC=CC=C8	5.22915
C_220	Chembl4564310	126962136	C1=CC=C2C(=C1)C(=CN2CC3=CC(=CC=C3)F)C4(C5=CC=CC=C5NC4=O)C6=CN(C7=CC=CC=C76)CC8=CC(=CC=C8)F	5.22915
C_221	Chembl4460080	126962137	C1=CC=C2C(=C1)C(=CN2CC3=CC=C(C=C3)Br)C4(C5=CC=CC=C5NC4=O)C6=CN(C7=CC=CC=C76)CC8=CC=C(C=C8)Br	5.22915
C_222	(2R,3S,4S)-1-[(2S,3S)-3-(2,2-Dimethylpropoxy)-2,4-dihydroxybutyl]-2-(hydroxymethyl)thiolan-1-ium-3,4-diol;chloride	127048314	CC(C)(C)CO[C@@H](CO)[C@@H](C[S+]1C[C@H]([C@@H]([C@H]1CO)O)O)O.[Cl-]	6.3279
C_223	(2R,3S,4S)-1-[(2S,3S)-2,4-Dihydroxy-3-(2-methylpropoxy)butyl]-2-(hydroxymethyl)thiolan-1-ium-3,4-diol;chloride	127051169	CC(C)CO[C@@H](CO)[C@@H](C[S+]1C[C@H]([C@@H]([C@H]1CO)O)O)O.[Cl-]	6.16115
C_224	(2R,3S,4S)-1-[(2S,3S)-2,4-Dihydroxy-3-pentoxybutyl]-2-(hydroxymethyl)thiolan-1-ium-3,4-diol;chloride	127052422	CCCCCO[C@@H](CO)[C@@H](C[S+]1C[C@H]([C@@H]([C@H]1CO)O)O)O.[Cl-]	5.82391
C_225	(2R,3S,4S)-1-[(2S,3S)-3-Heptoxy-2,4-dihydroxybutyl]-2-(hydroxymethyl)thiolan-1-ium-3,4-diol;chloride	127052423	CCCCCCCO[C@@H](CO)[C@@H](C[S+]1C[C@H]([C@@H]([C@H]1CO)O)O)O.[Cl-]	6.19382
C_226	Chembl4575035	127053745	C1=CC=C(C(=C1)CN2C=C(C3=CC=CC=C32)C4(C5=CC=CC=C5NC4=O)C6=CN(C7=CC=CC=C76)CC8=CC=CC=C8Cl)Cl	5.22915
C_227	Chembl4436320	127053746	C1=CC=C(C(=C1)CN2C=C(C3=CC=CC=C32)C4(C5=CC=CC=C5NC4=O)C6=CN(C7=CC=CC=C76)CC8=CC=CC=C8F)F	5.22915
C_228	Chembl4443865	127053747	CCCN1C=C(C2=CC=CC=C21)C3(C4=CC=CC=C4NC3=O)C5=CN(C6=CC=CC=C65)CCC	5.22915
C_229	Chembl4435550	127053748	CC(C)N1C=C(C2=CC=CC=C21)C3(C4=CC=CC=C4NC3=O)C5=CN(C6=CC=CC=C65)C(C)C	5.22915
C_230	Chembl4550304	127053749	CCCCN1C=C(C2=CC=CC=C21)C3(C4=CC=CC=C4NC3=O)C5=CN(C6=CC=CC=C65)CCCC	5.22915
C_231	Chembl4436361	127053750	CC(C)CN1C=C(C2=CC=CC=C21)C3(C4=CC=CC=C4NC3=O)C5=CN(C6=CC=CC=C65)CC(C)C	5.22915
C_232	5-[(3,4-Dihydro-2,2-dimethyl-2H-1-benzopyran-6-yl)methyl]-3-hydroxy-4-(4-hydroxyphenyl)-2(5H)-furanone	129774355	CC1(CCC2=C(O1)C=CC(=C2)CC3C(=C(C(=O)O3)O)C4=CC=C(C=C4)O)C	4.93367
C_233	Chembl4528814	132522820	C1=CC(=CC(=C1)F)C2=C(N=NC(=N2)SCC(COC3=CC4=C(C=C3)C=CC(=O)O4)O)C5=CC(=CC=C5)F	4.49485
C_234	Chembl4587989	132522821	C1=CC(=CC2=C1C=CC(=O)O2)OCC(CSC3=NC(=C(N=N3)C4=CC=C(C=C4)F)C5=CC=C(C=C5)F)O	4.49485
C_235	Chembl4469981	132522822	C1=CC=C(C=C1)C2=C(N=NC(=N2)SCC(COC3=CC4=C(C=C3)C=CC(=O)O4)O)C5=CC=CC=C5	4.49485
C_236	Chembl4579423	132522823	C1=COC(=C1)C2=C(N=NC(=N2)SCC(COC3=CC4=C(C=C3)C=CC(=O)O4)O)C5=CC=CO5	4.49485
C_237	Chembl4568819	132522824	C1=CC=C2C(=C1)C=C(C(=O)O2)OCC(CSC3=NC(=C(N=N3)C4=CC=CO4)C5=CC=CO5)O	4.49485
C_238	Chembl4558577	132522825	C1=CC=C2C(=C1)C=C(C(=O)O2)OCC(CSC3=NC(=C(N=N3)C4=CC=C(C=C4)F)C5=CC=C(C=C5)F)O	4.49485
C_239	Chembl4446517	132522826	C1=CC=C2C(=C1)C=C(C(=O)O2)OCC(CSC3=NC(=C(N=N3)C4=CC(=CC=C4)Br)C5=CC(=CC=C5)Br)O	4.49485
C_240	Flavipesolide B	132577715	CC1(CCC2=C(O1)C=CC(=C2)CC3=C([C@](OC3=O)(C(=O)OC)O)C4=CC=C(C=C4)O)C	4.98716
C_241	Flavipesolide C	132577716	CC1(CCC2=C(O1)C=CC(=C2)CC3=C([C@](OC3=O)(C(=O)O)O)C4=CC=C(C=C4)O)C	5.11748
C_242	2-[4-[[2-(2-Methoxyphenyl)-4,5-diphenylimidazol-1-yl]methyl]triazol-1-yl]-N-(4-methylphenyl)acetamide	134131791	CC1=CC=C(C=C1)NC(=O)CN2C=C(N=N2)CN3C(=C(N=C3C4=CC=CC=C4OC)C5=CC=CC=C5)C6=CC=CC=C6	4.82391
C_243	N-(2,4-Dichlorophenyl)-2-[4-[[2-(4-fluorophenyl)-4,5-diphenylimidazol-1-yl]methyl]triazol-1-yl]acetamide	134133547	C1=CC=C(C=C1)C2=C(N(C(=N2)C3=CC=C(C=C3)F)CC4=CN(N=N4)CC(=O)NC5=C(C=C(C=C5)Cl)Cl)C6=CC=CC=C6	4.82391
C_244	2-[4-[[2-(3-Chlorophenyl)-4,5-diphenylimidazol-1-yl]methyl]triazol-1-yl]-N-(4-methoxyphenyl)acetamide	134134001	COC1=CC=C(C=C1)NC(=O)CN2C=C(N=N2)CN3C(=C(N=C3C4=CC(=CC=C4)Cl)C5=CC=CC=C5)C6=CC=CC=C6	4.82391
C_245	N-(2,4-Dimethylphenyl)-2-[4-[[2-(3-fluorophenyl)-4,5-diphenylimidazol-1-yl]methyl]triazol-1-yl]acetamide	134134009	CC1=CC(=C(C=C1)NC(=O)CN2C=C(N=N2)CN3C(=C(N=C3C4=CC(=CC=C4)F)C5=CC=CC=C5)C6=CC=CC=C6)C	4.82391
C_246	Methyl 4-[1-[[1-[2-(4-ethoxyanilino)-2-oxoethyl]triazol-4-yl]methyl]-4,5-diphenylimidazol-2-yl]benzoate	134134112	CCOC1=CC=C(C=C1)NC(=O)CN2C=C(N=N2)CN3C(=C(N=C3C4=CC=C(C=C4)C(=O)OC)C5=CC=CC=C5)C6=CC=CC=C6	4.82391
C_247	2-[4-[[2-(3-Chlorophenyl)-4,5-diphenylimidazol-1-yl]methyl]triazol-1-yl]-N-(4-ethoxyphenyl)acetamide	134134969	CCOC1=CC=C(C=C1)NC(=O)CN2C=C(N=N2)CN3C(=C(N=C3C4=CC(=CC=C4)Cl)C5=CC=CC=C5)C6=CC=CC=C6	4.82391
C_248	2-[4-[[2-(3-Bromophenyl)-4,5-diphenylimidazol-1-yl]methyl]triazol-1-yl]-N-(2-ethoxyphenyl)acetamide	134137273	CCOC1=CC=CC=C1NC(=O)CN2C=C(N=N2)CN3C(=C(N=C3C4=CC(=CC=C4)Br)C5=CC=CC=C5)C6=CC=CC=C6	4.82391
C_249	2-[4-[(4,5-Diphenyl-2-thiophen-2-ylimidazol-1-yl)methyl]triazol-1-yl]-N-(4-methoxyphenyl)acetamide	134139205	COC1=CC=C(C=C1)NC(=O)CN2C=C(N=N2)CN3C(=C(N=C3C4=CC=CS4)C5=CC=CC=C5)C6=CC=CC=C6	4.82391
C_250	N-(2-Ethoxyphenyl)-2-[4-[[2-(2-fluorophenyl)-4,5-diphenylimidazol-1-yl]methyl]triazol-1-yl]acetamide	134140317	CCOC1=CC=CC=C1NC(=O)CN2C=C(N=N2)CN3C(=C(N=C3C4=CC=CC=C4F)C5=CC=CC=C5)C6=CC=CC=C6	4.82391
C_251	2-[4-[[2-(4-Bromophenyl)-4,5-diphenylimidazol-1-yl]methyl]triazol-1-yl]-N-(4-fluorophenyl)acetamide	134140665	C1=CC=C(C=C1)C2=C(N(C(=N2)C3=CC=C(C=C3)Br)CC4=CN(N=N4)CC(=O)NC5=CC=C(C=C5)F)C6=CC=CC=C6	4.82391
C_252	2-[4-[[2-(3-Fluorophenyl)-4,5-diphenylimidazol-1-yl]methyl]triazol-1-yl]-N-(2-methylphenyl)acetamide	134148325	CC1=CC=CC=C1NC(=O)CN2C=C(N=N2)CN3C(=C(N=C3C4=CC(=CC=C4)F)C5=CC=CC=C5)C6=CC=CC=C6	4.82391
C_253	2-[4-[[2-(4-Bromophenyl)-4,5-diphenylimidazol-1-yl]methyl]triazol-1-yl]-N-(2-methylphenyl)acetamide	134149940	CC1=CC=CC=C1NC(=O)CN2C=C(N=N2)CN3C(=C(N=C3C4=CC=C(C=C4)Br)C5=CC=CC=C5)C6=CC=CC=C6	4.82391
C_254	N-(2,4-Dichlorophenyl)-2-[4-[[2-(3,4-dimethoxyphenyl)-4,5-diphenylimidazol-1-yl]methyl]triazol-1-yl]acetamide	134151767	COC1=C(C=C(C=C1)C2=NC(=C(N2CC3=CN(N=N3)CC(=O)NC4=C(C=C(C=C4)Cl)Cl)C5=CC=CC=C5)C6=CC=CC=C6)OC	4.82391
C_255	2-[4-[[2-(3-Chlorophenyl)-4,5-diphenylimidazol-1-yl]methyl]triazol-1-yl]-N-(2,4-dimethylphenyl)acetamide	134156711	CC1=CC(=C(C=C1)NC(=O)CN2C=C(N=N2)CN3C(=C(N=C3C4=CC(=CC=C4)Cl)C5=CC=CC=C5)C6=CC=CC=C6)C	4.82391
C_256	Methyl 4-[1-[[1-[2-(2,5-dichloroanilino)-2-oxoethyl]triazol-4-yl]methyl]-4,5-diphenylimidazol-2-yl]benzoate	134157314	COC(=O)C1=CC=C(C=C1)C2=NC(=C(N2CC3=CN(N=N3)CC(=O)NC4=C(C=CC(=C4)Cl)Cl)C5=CC=CC=C5)C6=CC=CC=C6	4.82391
C_257	Chembl4476389	135391860	C1=CC=C(C=C1)C2=CC=C(C=C2)C3=CSC(=N3)N/N=C/C4=CC=CC5=CC=CC=C54	5.20761
C_258	N'-[(E)-(4-Hydroxy-3-methoxyphenyl)methylidene]-1H-indole-2-carbohydrazide	135580822	COC1=C(C=CC(=C1)/C=N/NC(=O)C2=CC3=CC=CC=C3N2)O	5.63827
C_259	Chembl4558252	135580865	C1=CC=C2C(=C1)C=C(C(=O)O2)C(=O)N/N=C/C3=CC=CC=C3O	5.95861
C_260	Chembl4217244	135603218	C1=CC=C2C(=C1)C=C(N2)C(=O)N/N=C/C3=CC=C(C=C3)O	5.63827
C_261	4-(4-Methyl-1H-benzoimidazole-2-yl)phenol	135974165	CC1=C2C(=CC=C1)NC(=N2)C3=CC=C(C=C3)O	5.27572
C_262	Chembl4529445	136163007	CC1=C2C(=CC=C1)NC(=N2)C3=CC=CC=C3O	5.27572
C_263	Chembl4475487	136168639	CC1=C2C(=CC=C1)NC(=N2)C3=C(C=C(C=C3)OC)O	5.27572
C_264	Chembl4482888	136168640	CC1=C2C(=CC=C1)NC(=N2)C3=C(C=CC(=C3)OC)O	5.27572
C_265	4-(1,3-Benzothiazol-2-yl)-N-[(E)-(2,4,6-trihydroxyphenyl)methylideneamino]benzamide	136180344	C1=CC=C2C(=C1)N=C(S2)C3=CC=C(C=C3)C(=O)N/N=C/C4=C(C=C(C=C4O)O)O	5.07727
C_266	Chembl4528769	136198571	C1=CC2=C(C=C1Cl)N=C(S2)C3=C(C=CC(=C3)Br)O	4.65758
C_267	Chembl4445451	136661648	CCCN1C2=CC=CC=C2C(=C1O)N=NC(=O)CC3=C(C=C(C=C3)Cl)Cl	5.65758
C_268	Chembl4540336	136661649	C1=CC(=C(C=C1CC(=O)N=NC2=C(NC3=C2C=CC(=C3)Br)O)Cl)Cl	5.65758
C_269	Chembl4458470	136661650	C1=CC(=C(C=C1Cl)Cl)CC(=O)N=NC2=C(NC3=C2C=CC(=C3)Br)O	5.65758
C_270	Chembl4455386	136661651	C1=CC=C(C(=C1)C(=O)N=NC2=C(NC3=C2C=CC(=C3)Br)O)O	5.65758
C_271	Chembl4556298	136706650	CC1=C2C(=CC=C1)NC(=N2)C3=CC(=C(C=C3)O)O	5.27572
C_272	Chembl4447344	136903786	CC1=C2C(=CC=C1)NC(=N2)C3=C(C=C(C=C3)O)O	5.27572
C_273	Chembl4474005	136927555	CC1=C2C(=CC=C1)NC(=N2)C3=C(C=CC(=C3)O)O	5.27572
C_274	4-(1,3-Benzothiazol-2-yl)-N-[(E)-(2-hydroxy-5-methoxyphenyl)methylideneamino]benzamide	136961465	COC1=CC(=C(C=C1)O)/C=N/NC(=O)C2=CC=C(C=C2)C3=NC4=CC=CC=C4S3	5.18709
C_275	4-(1,3-Benzothiazol-2-yl)-N-[(E)-(4-hydroxyphenyl)methylideneamino]benzamide	136961466	C1=CC=C2C(=C1)N=C(S2)C3=CC=C(C=C3)C(=O)N/N=C/C4=CC=C(C=C4)O	4.94731
C_276	4-(1,3-Benzothiazol-2-yl)-N-[(E)-(2,3-dihydroxyphenyl)methylideneamino]benzamide	136961467	C1=CC=C2C(=C1)N=C(S2)C3=CC=C(C=C3)C(=O)N/N=C/C4=C(C(=CC=C4)O)O	4.95001
C_277	4-(1,3-Benzothiazol-2-yl)-N-[(E)-(2-hydroxy-4-methoxyphenyl)methylideneamino]benzamide	136961468	COC1=CC(=C(C=C1)/C=N/NC(=O)C2=CC=C(C=C2)C3=NC4=CC=CC=C4S3)O	5.15677
C_278	4-(1,3-Benzothiazol-2-yl)-N-[(E)-(2-hydroxyphenyl)methylideneamino]benzamide	136961469	C1=CC=C(C(=C1)/C=N/NC(=O)C2=CC=C(C=C2)C3=NC4=CC=CC=C4S3)O	5.25571
C_279	4-(1,3-Benzothiazol-2-yl)-N-[(E)-(3,4-dihydroxyphenyl)methylideneamino]benzamide	136961470	C1=CC=C2C(=C1)N=C(S2)C3=CC=C(C=C3)C(=O)N/N=C/C4=CC(=C(C=C4)O)O	4.82131
C_280	4-(1,3-Benzothiazol-2-yl)-N-[(E)-(2,4-dihydroxyphenyl)methylideneamino]benzamide	136961471	C1=CC=C2C(=C1)N=C(S2)C3=CC=C(C=C3)C(=O)N/N=C/C4=C(C=C(C=C4)O)O	5.25337
C_281	4-(1,3-Benzothiazol-2-yl)-N-[(E)-(3-bromo-4-hydroxyphenyl)methylideneamino]benzamide	136961472	C1=CC=C2C(=C1)N=C(S2)C3=CC=C(C=C3)C(=O)N/N=C/C4=CC(=C(C=C4)O)Br	5.09313
C_282	4-(1,3-Benzothiazol-2-yl)-N-[(E)-(4-hydroxy-3-methoxyphenyl)methylideneamino]benzamide	136961473	COC1=C(C=CC(=C1)/C=N/NC(=O)C2=CC=C(C=C2)C3=NC4=CC=CC=C4S3)O	4.27295
C_283	4-(1,3-Benzothiazol-2-yl)-N-[(E)-(2,5-dihydroxyphenyl)methylideneamino]benzamide	136961474	C1=CC=C2C(=C1)N=C(S2)C3=CC=C(C=C3)C(=O)N/N=C/C4=C(C=CC(=C4)O)O	4.92628
C_284	(3Z)-3-[[4-(4-Fluorophenyl)thiazol-2-yl]hydrazono]indolin-2-one	136961580	C1=CC=C2C(=C1)C(=C(N2)O)N=NC3=NC(=CS3)C4=CC=C(C=C4)F	5.27572
C_285	Chembl4469378	136965669	CC1=C2C(=CC=C1)NC(=N2)C3=C(C(=CC=C3)O)O	5.27572
C_286	Chembl4576919	137001841	C1=CC=C2C(=C1)C=C(C(=O)O2)C3=CSC(=N3)C(=O)N/N=C/C4=CC=CC=C4O	5.20761
C_287	Chembl4573047	137001842	C1=CC=C2C(=C1)C=C(C(=O)O2)C3=CSC(=N3)C(=O)N/N=C/C4=CC=C(C=C4)O	5.20761
C_288	Chembl4574133	137001843	CC(C)(C)C1=CC(=C(C(=C1)C(C)(C)C)O)/C=N/NC(=O)C2=NC(=CS2)C3=CC4=CC=CC=C4OC3=O	5.20761
C_289	Chembl4129528	137001844	C1=CC=C2C(=C1)C=C(C(=O)O2)C3=CSC(=N3)C(=O)N/N=C/C4=C(C(=CC(=C4)Cl)Cl)O	5.20761
C_290	Chembl4553128	137001845	C1=CC=C2C(=C1)C=C(C(=O)O2)C3=CSC(=N3)C(=O)N/N=C/C4=CC(=C(C=C4)O)F	5.20761
C_291	Chembl4460908	137001846	C1=CC=C2C(=C1)C=C(C(=O)O2)C3=CSC(=N3)C(=O)N/N=C/C4=C(C=CC(=C4)Cl)O	5.20761
C_292	Chembl4553656	137001847	COC1=CC(=C(C=C1)/C=N/NC(=O)C2=NC(=CS2)C3=CC4=CC=CC=C4OC3=O)O	5.20761
C_293	Chembl4516889	137001849	C1=CC=C2C(=C1)C=C(C(=O)O2)C3=CSC(=N3)C(=O)N/N=C/C4=CC(=C(C=C4)O)O	5.20761
C_294	Chembl4466503	137014966	C1=CC=C2C(=C1)C=C(N2)C(=O)N/N=C/C3=CC(=C(C(=C3)O)O)O	5.63827
C_295	Chembl4559817	137014967	C1=CC=C2C(=C1)C=C(N2)C(=O)N/N=C/C3=C(C=C(C=C3O)O)O	5.63827
C_296	Chembl4471072	137014968	C1=CC=C2C(=C1)C=C(N2)C(=O)N/N=C/C3=C(C=CC(=C3)O)O	5.63827
C_297	Chembl4525854	137014969	C1=CC=C2C(=C1)C=C(N2)C(=O)N/N=C/C3=CC(=C(C=C3)O)O	5.63827
C_298	Chembl4593066	137014970	C1=CC=C2C(=C1)C=C(N2)C(=O)N/N=C/C3=C(C(=CC=C3)O)O	5.63827
C_299	Chembl4476335	137014971	C1=CC=C2C(=C1)C=C(N2)C(=O)N/N=C/C3=CC=CC=C3O	5.63827
C_300	Chembl4438611	137014972	COC1=CC(=C(C=C1)O)/C=N/NC(=O)C2=CC3=CC=CC=C3N2	5.63827
C_301	Chembl4526446	137179324	C1=CC=C2C(=C1)C(=C(N2)O)N=NC(=O)COC3=CC4=C(C=C3)C=CC(=O)O4	5.60206
C_302	Chembl4553582	137179325	CC1=CC2=C(C=C1)NC(=C2N=NC(=O)COC3=CC4=C(C=C3)C=CC(=O)O4)O	5.60206
C_303	Chembl4435626	137179326	CC1=CC(=C2C(=C1)C(=C(N2)O)N=NC(=O)COC3=CC4=C(C=C3)C=CC(=O)O4)C	5.60206
C_304	Chembl4463121	137179327	C1=CC(=CC2=C1C=CC(=O)O2)OCC(=O)N=NC3=C(NC4=C3C=C(C=C4)F)O	5.60206
C_305	Chembl4532650	137179328	C1=CC(=CC2=C1C=CC(=O)O2)OCC(=O)N=NC3=C(NC4=C3C=C(C=C4)Cl)O	5.60206
C_306	Chembl4578640	137179329	C1=CC(=CC2=C1C=CC(=O)O2)OCC(=O)N=NC3=C(NC4=C3C=C(C=C4)Br)O	5.60206
C_307	Chembl4471443	137179330	C1=CC(=CC2=C1C=CC(=O)O2)OCC(=O)N=NC3=C(NC4=C3C=C(C=C4)[N+](=O)[O-])O	5.60206
C_308	Chembl4561189	137179331	CN1C2=CC=CC=C2C(=C1O)N=NC(=O)COC3=CC4=C(C=C3)C=CC(=O)O4	5.60206
C_309	Chembl4568489	137179332	C1=CC=C(C=C1)CN2C3=CC=CC=C3C(=C2O)N=NC(=O)COC4=CC5=C(C=C4)C=CC(=O)O5	5.60206
C_310	Chembl4438638	137179333	C1=CC=C(C(=C1)CN2C3=CC=CC=C3C(=C2O)N=NC(=O)COC4=CC5=C(C=C4)C=CC(=O)O5)F	5.60206
C_311	Chembl4475058	137179334	C1=CC=C2C(=C1)C(=C(N2CC3=CC(=CC=C3)F)O)N=NC(=O)COC4=CC5=C(C=C4)C=CC(=O)O5	5.60206
C_312	Chembl4441977	137179335	C1=CC=C(C(=C1)CN2C3=CC=CC=C3C(=C2O)N=NC(=O)COC4=CC5=C(C=C4)C=CC(=O)O5)Cl	5.60206
C_313	Chembl4518046	137179336	C1=CC=C2C(=C1)C(=C(N2CC3=CC=C(C=C3)Br)O)N=NC(=O)COC4=CC5=C(C=C4)C=CC(=O)O5	5.60206
C_314	Chembl4587269	137179337	CC1=CC2=C(C=C1)N(C(=C2N=NC(=O)COC3=CC4=C(C=C3)C=CC(=O)O4)O)CC5=CC=CC=C5F	5.60206
C_315	Chembl4537391	137179338	CC1=CC2=C(C=C1)N(C(=C2N=NC(=O)COC3=CC4=C(C=C3)C=CC(=O)O4)O)CC5=CC(=CC=C5)F	5.60206
C_316	Chembl4516073	137179339	C1=CC=C(C(=C1)CN2C3=C(C=C(C=C3)Cl)C(=C2O)N=NC(=O)COC4=CC5=C(C=C4)C=CC(=O)O5)F	5.60206
C_317	Chembl4545087	137179340	C1=CC(=CC(=C1)F)CN2C3=C(C=C(C=C3)Cl)C(=C2O)N=NC(=O)COC4=CC5=C(C=C4)C=CC(=O)O5	5.60206
C_318	Chembl4581970	137179341	C1=CC=C(C=C1)CN2C3=C(C=C(C=C3)Br)C(=C2O)N=NC(=O)COC4=CC5=C(C=C4)C=CC(=O)O5	5.60206
C_319	Chembl4583142	137179342	C1=CC=C(C(=C1)CN2C3=C(C=C(C=C3)Br)C(=C2O)N=NC(=O)COC4=CC5=C(C=C4)C=CC(=O)O5)Cl	5.60206
C_320	Chembl4452470	137179343	C1=CC(=CC2=C1C=CC(=O)O2)OCC(=O)N=NC3=C(N(C4=C3C=C(C=C4)Br)CC5=CC=C(C=C5)Br)O	5.60206
C_321	Chembl4161936	137242181	C1=CC=C2C(=C1)C=C(C(=O)O2)C(=O)N/N=C/C3=C(C=C(C=C3)O)O	5.95861
C_322	Chembl4531264	139231919	C1=CC=C(C=C1)C(C2=C(C3=CC=CC=C3OC2=O)N)C4=C(C5=CC=CC=C5OC4=O)N	4.69897
C_323	Chembl4214649	139589754	CC1=CC(=CC(=C1C(=O)O[C@H]2[C@@H]3COC(=CC3=CC(=O)[C@@]2(C)O)/C=C/[C@H](C)O)O)O	4.10458
C_324	Chembl4215785	139589755	CC1=CC(=CC(=C1C(=O)O[C@H]2[C@@H]3COC(=CC3=CC(=O)[C@@]2(C)O)/C=C/C=O)O)O	4.64016
C_325	Chembl4556172	141348410	C1=CC=C2C(=C1)C(=C(C(=O)O2)C(C3=CC=C(C=C3)[N+](=O)[O-])C4=C(C5=CC=CC=C5OC4=O)N)N	4.69897
C_326	Chembl4459976	141348411	CC1=CC=C(C=C1)C(C2=C(C3=CC=CC=C3OC2=O)N)C4=C(C5=CC=CC=C5OC4=O)N	4.69897
C_327	Chembl4472698	141734915	COC1=CC=CC(=C1)C(C2=C(C3=CC=CC=C3OC2=O)N)C4=C(C5=CC=CC=C5OC4=O)N	4.69897
C_328	Chembl4468008	141734918	C1=CC=C2C(=C1)C(=C(C(=O)O2)C(C3=CC=C(C=C3)O)C4=C(C5=CC=CC=C5OC4=O)N)N	4.69897
C_330	Chembl4162593	145959976	C[C@@H]([C@@H](C1=CC(=C(C=C1OC)OC)OC)OC)O	4.09366
C_331	Chembl4127059	145963604	CC1=CC=C(C=C1)N\2C(=O)/C(=C/C3=CC=C(C=C3)F)/S/C2=N\NC(=O)C4=CC5=CC=CC=C5OC4=O	7.04576
C_332	Chembl4209580	145963815	CCCOC1=CC=C(C=C1)C2=C(C=C(C(=C2OCCC)OC)C3=CC=C(C=C3)O)OC	4.97062
C_333	Chembl4210289	145963840	COC1=C(C(=C(C(=C1)C2=CC=C(C=C2)O)OC)OC(=O)C3=CC=CO3)C4=CC=C(C=C4)O	4.451
C_334	Chembl4211872	145963896	COC1=C(C(=C(C(=C1C2=CC=C(C=C2)O)O)OC)C3=CC=C(C=C3)O)Br	5.1463
C_335	Chembl4209056	145964250	COC1=C(C(=C(C(=C1)C2=CC=C(C=C2)OCC=C)OC)OCC=C)C3=CC=C(C=C3)O	5.057
C_336	Chembl4208620	145964468	C1=CC(=C(C=C1O)O)/C(=C/C(=O)/C=C/C2=C(C=CC(=C2)O)O)/O	4.69897
C_337	Chembl4213599	145964658	CC1(CCC2=C(O1)C=CC(=C2)CC3=C(C(OC3=O)O)C4=CC=C(C=C4)O)C	4.87419
C_338	Chembl4212356	145964828	C1=CC(=C(C=C1O)/C=C/C(=O)/C=C(/C2=C(C=CC(=C2)O)O)\O)O	4.70774
C_339	Chembl4210494	145965222	CC(C)CCOC1=C(C(=CC(=C1C2=CC=C(C=C2)O)OC)C3=CC=C(C=C3)O)OC	5.06651
C_340	Chembl4213451	145965338	COC1=C(C(=C(C(=C1)C2=CC=C(C=C2)O)OC)OCC=C)C3=CC=C(C=C3)O	4.07676
C_341	Chembl4212935	145966248	C1C/C(=C\C2=CC=CC=C2)/C(=O)/C(=C/C3=CC(=CC=C3)O)/C1	4.54668
C_342	Chembl4213017	145966252	COC1=C(C(=C(C(=C1)C2=CC=C(C=C2)OCCBr)OC)O)C3=CC=C(C=C3)O	4.79317
C_343	Chembl4213889	145966541	CCCOC1=CC=C(C=C1)C2=C(C=C(C(=C2O)OC)C3=CC=C(C=C3)O)OC	4.91009
C_344	Chembl4211347	145966678	COC1=C(C(=C(C(=C1C2=CC=C(C=C2)O)O)OC)C3=CC=C(C=C3)O)Cl	4.50446
C_345	Chembl4211682	145966924	CC(=CCC/C(=C/CC1=C(C(=C(C2=C1OC3=C(C2=O)C=C(C=C3)O)O)CC(C(=C)C)O)O)/C)C	5.31876
C_346	Chembl4213032	145966975	C1=COC(=C1)/C=C/C(=O)/C=C(/C2=C(C=CC(=C2)O)O)\O	4.85078
C_347	Chembl4208759	145967044	C1C/C(=C\C2=CC=CC=C2)/C(=O)/C(=C/C3=CC(=C(C=C3)O)O)/C1	4.6925
C_348	Chembl4211086	145967377	COC1=C(C(=C(C(=C1)C2=CC=C(C=C2)OCC3=CC=CC=C3)OC)O)C4=CC=C(C=C4)O	4.90309
C_349	Chembl4218969	145969640	CC(=CCOC1=CC=C(C=C1)C2=CC(=C(C(=C2OC)OCC=C(C)C)C3=CC=C(C=C3)O)OC)C	4.27491
C_350	Chembl4218731	145969860	CC1(C(OC2=C1C3=C(C(=C2)O)C(=O)C4=C(O3)C(=C(C=C4)O)OC)CO)C	4.13847
C_351	Chembl4218824	145970308	CCCOC1=C(C(=CC(=C1C2=CC=C(C=C2)O)OC)C3=CC=C(C=C3)O)OC	4.71444
C_352	Chembl4217433	145972163	COC1=C(C(=C(C(=C1)C2=CC=C(C=C2)O)OC)OCCBr)C3=CC=C(C=C3)O	4.72584
C_353	Chembl4216866	145972609	CC(=CCC1=C(C=CC(=C1)CC2=C([C@H](OC2=O)OC)C3=CC=C(C=C3)O)O)C	5.06298
C_354	Chembl4176304	145973828	C1=CC=C2C(=C1)C=C(C(=O)O2)C(=O)N/N=C/C3=CC=NC=C3	5.95861
C_355	Chembl4215150	145973915	C1=CC(=CC(=C1)O)/C=C/C(=O)/C=C(/C2=C(C=CC(=C2)Cl)O)\O	4.4389
C_356	Chembl4215507	145973934	COC1=C(C(=C(C(=C1)C2=CC=C(C=C2)OCC#C)OC)OCC#C)C3=CC=C(C=C3)O	4.6968
C_357	Chembl4216906	145974223	CCCOC1=CC=C(C=C1)C2=CC(=C(C(=C2OC)OCCC)C3=CC=C(C=C3)O)OC	5.06098
C_358	Chembl4217851	145974284	COC1=C(C(=C(C(=C1)C2=CC=C(C=C2)OCC=C)OC)O)C3=CC=C(C=C3)O	4.57675
C_359	Chembl4216309	145974668	C1=CC(=C(C=C1/C=C/C(=O)/C=C(/C2=C(C=CC(=C2)Cl)O)\O)O)O	4.82102
C_360	Chembl4217611	145974739	C1=CC=C(C(=C1)/C(=C/C(=O)/C=C/C2=C(C=C(C=C2)O)O)/O)O	4.39041
C_361	Chembl4216316	145974910	CCCOC1=CC=C(C=C1)C2=CC(=C(C(=C2OC)O)C3=CC=C(C=C3)O)OC	5
C_362	Chembl4202793	145975037	COC1=C(C(=C(C(=C1)C2=CC=C(C=C2)OCC3=CC=C(C=C3)C4=CC=CC=C4)OC)O)C5=CC=C(C=C5)O	4.91364
C_363	Chembl4208135	145975482	CC(=CCCC(C)(C1CC2=C3C(=C(C(=C2O1)CC=C(C)C)O)C(=O)C4=C(O3)C=CC(=C4)O)O)C	4.79317
C_364	Chembl4204289	145976069	COC1=C(C(=C(C(=C1)C2=CC=C(C=C2)OCCBr)OC)OCCBr)C3=CC=C(C=C3)O	5.17587
C_365	Chembl4205623	145976610	CC(C)CCOC1=CC=C(C=C1)C2=CC(=C(C(=C2OC)O)C3=CC=C(C=C3)O)OC	4.84466
C_366	Chembl4206986	145976670	COC1=C(C(=C(C(=C1)C2=CC=C(C=C2)O)O)O)C3=CC=C(C=C3)O	4.87943
C_368	Chembl4206199	145976888	COC1=C(C(=C(C(=C1)C2=CC=C(C=C2)O)OC)O)C3=CC=C(C=C3)OCC4=CC=CC=C4	4.90309
C_369	Chembl4207664	145977197	COC1=C(C(=C(C(=C1)C2=CC=C(C=C2)O)OC)OCC3=CC=CC=C3)C4=CC=C(C=C4)O	4.71897
C_370	Chembl4206708	145977661	CC(=CCOC1=C(C(=CC(=C1C2=CC=C(C=C2)O)OC)C3=CC=C(C=C3)O)OC)C	4.63078
C_371	Chembl4203265	145977996	CC(=CCCC(=C)C(CC1=C2C(=C(C(=C1O)CC=C(C)C)O)C(=O)C3=C(O2)C=CC(=C3)O)O)C	4.99568
C_372	Chembl4206131	145978101	COC1=C(C(=C(C(=C1)C2=CC=C(C=C2)O)OC)O)C3=CC=C(C=C3)OCC=C	4.49214
C_373	Chembl4204714	145978278	CC(=CCOC1=CC=C(C=C1)C2=CC(=C(C(=C2OC)O)C3=CC=C(C=C3)O)OC)C	4.6968
C_374	Chembl4208107	145978407	COC1=C(C(=C(C(=C1)C2=CC=C(C=C2)O)OC)O)C3=CC=C(C=C3)OCCBr	4.74473
C_375	Chembl4207509	145978619	C1=CC(=CC=C1C2=CC(=O)C(=C(C2=O)O)C3=CC=C(C=C3)O)O	4.64397
C_376	Chembl4278947	145978931	C1=CC=C2C(=C1)C(=O)N(C2=O)COC3=C(C=C(C=C3)[N+](=O)[O-])/C=C\4/C(=O)NC(=S)S4	4.44624
C_377	Chembl4280619	145979451	COC1=C(C=CC(=C1)/C=C\2/C(=O)NC(=S)S2)OCN3C(=O)C4=CC=CC=C4C3=O	4.7929
C_378	Chembl4281051	145979918	CCOC1=C(C=CC(=C1)/C=C\2/C(=O)NC(=S)S2)OCN3C(=O)C4=CC=CC=C4C3=O	5.11238
C_379	Chembl4282143	145981550	COC1=CC(=CC(=C1OCN2C(=O)C3=CC=CC=C3C2=O)OC)/C=C\4/C(=O)NC(=S)S4	4.40001
C_380	Chembl4277201	145984650	COC1=C(C=CC(=C1)/C=C\2/C(=O)NC(=O)S2)OCN3C(=O)C4=CC=CC=C4C3=O	4.4542
C_381	Chembl4277205	145984653	C1=CC=C2C(=C1)C(=O)N(C2=O)COC3=C(C=C(C=C3)[N+](=O)[O-])/C=C\4/C(=O)NC(=O)S4	4.29714
C_382	Chembl4277622	145985850	C1=CC=C2C(=C1)C(=O)N(C2=O)COC3=C(C=C(C=C3)/C=C\4/C(=O)NC(=O)S4)[N+](=O)[O-]	4.6482
C_383	Chembl4288954	145986556	C1=CC=C2C(=C1)C(=O)N(C2=O)COC3=CC=CC(=C3)/C=C\4/C(=O)NC(=S)S4	4.46878
C_384	Chembl4291262	145986665	C1=CC=C2C(=C1)C(=O)N(C2=O)COC3=C(C=C(C=C3)/C=C\4/C(=O)NC(=O)S4)Cl	4.67882
C_385	Chembl4289618	145988648	C1=CC=C2C(=C1)C(=O)N(C2=O)COC3=C(C=C(C=C3)/C=C\4/C(=O)NC(=S)S4)Cl	5.2644
C_386	Chembl4292355	145989626	C1=CC=C2C(=C1)C(=O)N(C2=O)COC3=CC=C(C=C3)/C=C\4/C(=O)NC(=S)S4	5.10182
C_387	Chembl4284072	145990339	C1=CC=C2C(=C1)C(=O)N(C2=O)COC3=CC=C(C=C3)/C=C\4/C(=O)NC(=O)S4	4.59176
C_388	Chembl4287854	145991381	CCOC1=C(C=CC(=C1)/C=C\2/C(=O)NC(=O)S2)OCN3C(=O)C4=CC=CC=C4C3=O	4.53373
C_389	Chembl4286187	145993316	C1=CC=C2C(=C1)C(=O)N(C2=O)COC3=C(C=C(C=C3)Cl)/C=C\4/C(=O)NC(=S)S4	4.45817
C_390	Chembl4294091	145993688	C1=CC=C2C(=C1)C(=O)N(C2=O)COC3=C(C=C(C=C3)/C=C\4/C(=O)NC(=S)S4)[N+](=O)[O-]	5.18111
C_391	Chembl4553154	155510402	C[C@H](CN1C=C(N=N1)C(=O)OC)OC2=C(C=C(C=C2)Br)OC	4.85387
C_392	Chembl4543253	155510527	CC1=CC=C(C=C1)C2=CSC(=N2)NC(=O)CSC3=NC(=C(N=N3)C4=CC=C(C=C4)Br)C5=CC=C(C=C5)Br	5.55284
C_393	Chembl4435180	155510903	C1=CC(=CC=C1/C=C\2/C3=C(C=C(C=C3)Cl)NC2=O)C4=NN=C(O4)C5=CC(=CC(=C5)O)O	5.92082
C_394	Chembl4435225	155511020	COC1=CC(=C(C=C1)NC(=O)CN2C=C(N=N2)COC3=CC(=C4C(=C3)OC5=C(C4=O)C=CC(=C5)Br)O)OC	5.55596
C_395	Chembl4435963	155511451	C1=CC(=CC=C1C2=CSC(=N2)NC(=O)CSC3=NC(=C(N=N3)C4=CC=C(C=C4)Br)C5=CC=C(C=C5)Br)F	5.55284
C_396	Chembl4437002	155512130	CC1=CC=C(C=C1)C(C2=CNC3=C2C=C(C=C3)C(=O)NNS(=O)(=O)C4=CC=CC=C4[N+](=O)[O-])C5=CNC6=C5C=C(C=C6)C(=O)NNS(=O)(=O)C7=CC=CC=C7[N+](=O)[O-]	5.67778
C_397	Chembl4437073	155512321	C1=CC=C2C(=C1)N=NN2C(=O)C3=CC(=C(C=C3)Cl)N	5.36452
C_398	Chembl4437179	155512324	C1=CC=C2C(=C1)C=C(N2)C(=O)N/N=C/C3=CC(=C(C=C3)Br)F	5.63827
C_399	Chembl4437052	155512333	C1=CC(=CC(=C1)F)CSC2=NC(=CC(=N2)C3=CC=C(C=C3)Br)C4=CC=C(C=C4)Br	4.72125
C_400	Chembl4438224	155512866	C1=CC=C2C(=C1)C=C(C(=O)O2)C3=NN(C(=S)O3)C(C4=C(C=C(C=C4)Cl)Cl)NC5=CC=C(C=C5)NC(C6=C(C=C(C=C6)Cl)Cl)N7C(=S)OC(=N7)C8=CC(=O)OC9=CC=CC=C98	7.1549
C_401	Chembl4438176	155513004	CC1=CC=C(C=C1)C2=CSC(=N2)N=NC3=C(NC4=C3C=C(C=C4)F)O	5.27572
C_402	Chembl4439490	155513999	C1=CC(=C(C=C1NC(=O)CN2C=C(N=N2)COC3=CC(=C4C(=C3)OC5=C(C4=O)C=CC(=C5)O)O)O)O	5.21254
C_403	Chembl4439937	155514095	CC1=CC=C(C=C1)C(C2=CNC3=C2C=C(C=C3)C(=O)NNS(=O)(=O)C4=CC=C(C=C4)[N+](=O)[O-])C5=CNC6=C5C=C(C=C6)C(=O)NNS(=O)(=O)C7=CC=C(C=C7)[N+](=O)[O-]	5.67778
C_404	Chembl4440340	155514524	C1=CC(=CC=C1CN2C=C(N=N2)CSC3=NC4=C(S3)C=CC(=C4)Cl)Cl	4.69897
C_405	Chembl4440783	155514589	CC1=CC=CC=C1C(=O)N=C2N(C(=CS2)C)C3=CC(=C(C=C3Cl)Cl)Cl	6.82391
C_406	Chembl4440810	155514778	CC1=C(C2=CC=CC=C2N1)C3=NN=C(O3)C4=CC=C(C=C4)C(C5=CN(C6=CC=CC=C65)C)C7=CN(C8=CC=CC=C87)C	4.69897
C_407	Chembl4441658	155515326	CC1=CC=CC=C1N\2C(=O)/C(=C/C3=CC=C(C=C3)F)/S/C2=N\NC(=O)C4=CC5=CC=CC=C5OC4=O	7.04576
C_408	Chembl4442388	155515892	COC1=C(C=C(C=C1)Br)/C=N/C2=NN=C(S2)C3=CC(=CC=C3)[N+](=O)[O-]	5.63827
C_409	Chembl4442881	155516122	C1=CC=C(C=C1)COC2=C(C=CC(=C2)C3=NN=C(S3)N)Cl	5.63827
C_410	Chembl4442767	155516250	CC1=CC(=CC=C1)C(=O)N=C2N(C(=CS2)C)C3=CC(=C(C=C3Cl)Cl)Cl	7
C_411	Chembl4443246	155516355	CC1=CC=C(C=C1)NC(=S)NNC(=O)C2=CC=C(C=C2)C3=NN=C(O3)C4=CC=CC=C4Cl	6.39794
C_412	Chembl4443277	155516406	CC1=CSC(=NC(=O)C2=CC3=CC=CC=C3OC2=O)N1C4=CC(=C(C=C4Cl)Cl)Cl	7
C_413	Chembl4443928	155516781	C1=CC(=CC=C1CN2C=C(N=N2)CSC3=NC4=C(S3)C=CC(=C4)Cl)Br	4.69897
C_414	Chembl4444058	155517195	CC1=CC=C(C=C1)C(C2=CNC3=C2C=C(C=C3)C(=O)NNS(=O)(=O)C4=CC=CC=C4Br)C5=CNC6=C5C=C(C=C6)C(=O)NNS(=O)(=O)C7=CC=CC=C7Br	7
C_415	Chembl4444856	155517485	CC1=CC=C(C=C1)C(C2=CNC3=C2C=C(C=C3)C(=O)NNS(=O)(=O)C4=C(C=CC(=C4)Cl)Cl)C5=CNC6=C5C=C(C=C6)C(=O)NNS(=O)(=O)C7=C(C=CC(=C7)Cl)Cl	7
C_416	Chembl4444658	155517504	C1=CC=C2C(=C1)C=C(C(=O)O2)C3=CSC(=N3)C(=O)N/N=C/C4=C(C=CC(=C4)O)O	5.20761
C_417	Chembl4446128	155518299	COC1=CC=CC=C1NC(=S)NNC(=O)C2=CC=C(C=C2)C3=NN=C(O3)C4=CC=CC=C4Cl	6.39794
C_418	Chembl4446840	155518413	COC1=CC2=C(C=C1)C(=O)C3=C(C=C(C=C3O2)OCC4=CN(N=N4)CC(=O)NC5=CC(=C(C=C5)OC)OC)O	4.7986
C_419	Chembl4446848	155518475	CC1=CC(=C2C(=C1)C(=C(N2)O)N=NC3=NC(=CS3)C4=CC=C(C=C4)Br)C	5.27572
C_420	Chembl4447231	155518958	C1=CC=C2C(=C1)C=C(C(=O)O2)C(=O)N/N=C/C3=CC=CC=N3	5.95861
C_421	Chembl4448264	155519329	C1=CC=C2C(=C1)C=C(C(=O)O2)C3=NN(C(=S)O3)C(C4=CC(=CC=C4)Br)NC5=CC=C(C=C5)OC6=CC=C(C=C6)NC(C7=CC(=CC=C7)Br)N8C(=S)OC(=N8)C9=CC1=CC=CC=C1OC9=O	7.1549
C_422	Chembl4447911	155519624	C1=CC=C2C(=C1)C(=CN2)C3=NN=C(O3)C4=CC=C(C=C4)C(C5=CNC6=C5C=C(C=C6)Cl)C7=CNC8=C7C=C(C=C8)Cl	4.69897
C_423	Chembl4448033	155519901	C1=CC=C2C(=C1)C=C(C(=O)O2)C3=NN(C(=S)O3)C(C4=C(C=C(C=C4)Cl)Cl)NC5=CC=C(C=C5)C6=CC=C(C=C6)NC(C7=C(C=C(C=C7)Cl)Cl)N8C(=S)OC(=N8)C9=CC(=O)OC1=CC=CC=C19	7.1549
C_424	Chembl4448529	155519963	CC1=CC=C(C=C1)C(NC2=CC=C(C=C2)C3=CC=C(C=C3)NC(C4=CC=C(C=C4)C)N5C(=S)OC(=N5)C6=CC(=O)OC7=CC=CC=C76)N8C(=S)OC(=N8)C9=CC1=CC=CC=C1OC9=O	7.1549
C_425	Chembl4449167	155520318	C1=CC=C2C(=C1)C=C(C(=O)O2)C3=NN(C(=S)O3)C(C4=CC=C(C=C4)Cl)NC5=CC=C(C=C5)NC(C6=CC=C(C=C6)Cl)N7C(=S)OC(=N7)C8=CC(=O)OC9=CC=CC=C98	7.1549
C_426	Chembl4449386	155520883	CC1=CC=C(C=C1)C2=CC(=NC(=N2)SCC3=CC=CC=C3Cl)C4=CC(=CC=C4)Br	4.72125
C_427	Chembl4449655	155520902	CCOC(=O)CN1C(=O)/C(=C\C2=CC=C(C=C2)N3C=CC4=C(C=CN=C43)Br)/SC1=O	6.25964
C_428	Chembl4449860	155520978	C1=CC=C(C(=C1)C(=O)CN2C3=CC=CC=C3N=N2)O	5.31247
C_429	Chembl4450153	155521316	CC1=CC=C(C=C1)C(C2=CNC3=C2C=C(C=C3)C(=O)NNS(=O)(=O)C4=CC=CC=C4Cl)C5=CNC6=C5C=C(C=C6)C(=O)NNS(=O)(=O)C7=CC=CC=C7Cl	7
C_430	Chembl4451108	155521807	C1=CC=C2C(=C1)C=C(C(=O)O2)C3=NN(C(=S)O3)C(C4=CC=C(C=C4)[N+](=O)[O-])NC5=CC=C(C=C5)C6=CC=C(C=C6)NC(C7=CC=C(C=C7)[N+](=O)[O-])N8C(=S)OC(=N8)C9=CC(=O)OC1=CC=CC=C19	7.1549
C_431	Chembl4450733	155522269	C1=CC=C2C(=C1)C=C(C(=O)O2)C(=O)N/N=C/C3=CC(=CC=C3)F	5.95861
C_432	Chembl4451317	155522295	C1=CC=C2C(=C1)C(=CN2)C3=NN=C(O3)C4=CC=C(C=C4)C(C5=CNC6=C5C=C(C=C6)C#N)C7=CNC8=C7C=C(C=C8)C#N	4.69897
C_433	Chembl4450847	155522340	COC1=CC=C(C=C1)CC2=NN=C(N2CC(=O)NNC(=S)NC3=CC=C(C=C3)Cl)C4=CC=C(C=C4)Cl	5.46852
C_434	Chembl4453617	155522673	CN1C2=CC=CC=C2C(=C1O)N=NC3=NC(=CS3)C4=CC=C(C=C4)F	5.27572
C_435	Chembl4453256	155522925	COC1=CC=C(C=C1)C2=CSC(=N2)NC(=O)CSC3=NC(=C(N=N3)C4=CC=C(C=C4)Br)C5=CC=C(C=C5)Br	5.55284
C_436	Chembl4453742	155523305	C1=CC=C2C(=C1)C=C(C(=O)O2)C3=NN(C(=S)O3)C(C4=C(C=C(C=C4)Cl)Cl)NC5=CC=C(C=C5)OC6=CC=C(C=C6)NC(C7=C(C=C(C=C7)Cl)Cl)N8C(=S)OC(=N8)C9=CC1=CC=CC=C1OC9=O	7.1549
C_437	Chembl4454919	155524062	CC(=O)OC1=CC(=CC2=C1C(=O)C3=C(O2)C=C(C=C3)OC)OCC4=CN(N=N4)CC(=O)NC5=C(C=C(C=C5)OC)OC	4.47939
C_438	Chembl4453842	155524159	CC(=O)OC1=CC(=CC2=C1C(=O)C3=C(O2)C=C(C=C3)OC)OCC4=CN(N=N4)CC(=O)NC5=CC(=C(C=C5)OC)OC	4.00599
C_439	Chembl4454670	155524260	CC1=C(C2=CC=CC=C2N1)C3=NN=C(O3)C4=CC=C(C=C4)C(C5=CNC6=C5C=C(C=C6)Br)C7=CNC8=C7C=C(C=C8)Br	4.69897
C_440	Chembl4454092	155524303	C1=CC(=CC=C1CSC2=NC(=CC(=N2)C3=CC=C(C=C3)Br)C4=CC=C(C=C4)Br)F	4.72125
C_441	Chembl4456568	155524371	CC1=CSC(=NC(=O)C2=CC=CC3=CC=CC=C32)N1C4=CC(=C(C=C4Cl)Cl)Cl	6.82391
C_442	Chembl4456031	155524800	COC1=C(C=C(C=C1)NC(=O)CN2C=C(N=N2)COC3=CC(=C4C(=C3)OC5=C(C4=O)C=C(C=C5)Br)O)OC	4.5252
C_443	Chembl4457539	155525398	COC1=CC=C(C=C1)N\2C(=O)/C(=C/C3=CC=C(C=C3)F)/S/C2=N\NC(=O)C4=CC5=CC=CC=C5OC4=O	7.04576
C_444	Chembl4457153	155525485	C1=CC=C(C(=C1)CN2C=C(N=N2)CSC3=NC4=CC=CC=C4S3)Br	4.69897
C_445	Chembl4457996	155525755	CC1=CSC(=NC(=O)C2=CC=C(C=C2)OC)N1C3=CC(=C(C=C3Cl)Cl)Cl	7
C_446	Chembl4456879	155525777	C1=CC(=CC=C1/C=C/2\C(=O)NC(=O)S2)N3C=C(C=N3)[N+](=O)[O-]	6.25964
C_447	Chembl4457442	155526039	C1=CC2=C(C=C1Cl)N=C(S2)SCC3=CN(N=N3)CC4=CC(=CC(=C4)Cl)Cl	4.69897
C_448	Chembl4459113	155526708	C1=CC=C2C(=C1)C=C(C(=O)O2)C3=NN(C(=S)O3)C(C4=CC(=CC=C4)Br)NC5=CC=C(C=C5)NC(C6=CC(=CC=C6)Br)N7C(=S)OC(=N7)C8=CC(=O)OC9=CC=CC=C98	7.1549
C_449	Chembl4458326	155526927	C1=CC=C2C(=C1)N=C(S2)SCC3=CN(N=N3)CC4=CC=C(C=C4)Br	4.69897
C_450	Chembl4458336	155526933	C1=CC=C(C=C1)C2=CSC(=N2)NC(=O)CSC3=NC(=C(N=N3)C4=CC=C(C=C4)F)C5=CC=C(C=C5)F	5.55284
C_451	Chembl4458754	155527075	C1=CC=C2C(=C1)C(=C(C(=O)O2)C(C3=CC(=CC=C3)Cl)C4=C(C5=CC=CC=C5OC4=O)N)N	4.69897
C_452	Chembl4458477	155527124	CC(C)C[C@@H](C(=O)N[C@@H](CCSC)C(=O)O)NC(=O)[C@H](CO)NC(=O)[C@@H]1CCCN1C(=O)[C@H](C(C)C)NC(=O)[C@H](CCCN=C(N)N)N	4.63695
C_453	Chembl4458760	155527135	CC1=CC=C(C=C1)C2=CC(=NC(=N2)SCC3=CC=C(C=C3)F)C4=CC(=CC=C4)Br	4.72125
C_454	Chembl4459920	155527576	CC1=CC=C(C=C1)C(C2=CNC3=C2C=C(C=C3)C(=O)NNS(=O)(=O)C4=CC=C(C=C4)C)C5=CNC6=C5C=C(C=C6)C(=O)NNS(=O)(=O)C7=CC=C(C=C7)C	7
C_455	Chembl4460050	155527615	C1=CC(=CC=C1C2=CSC(=N2)NC(=O)CSC3=NC(=C(N=N3)C4=CC=C(C=C4)F)C5=CC=C(C=C5)F)F	5.55284
C_456	Chembl4460633	155527901	C1=CC=C(C=C1)C2=C(N(C(=N2)C3=C(NC4=CC=CC=C43)C5=CC(=CC=C5)Cl)C6=CC=CC=C6)C7=CC=CC=C7	5.08092
C_457	Chembl4460212	155527937	C1=CC(=CC=C1CSC2=NC(=CC(=N2)C3=CC=C(C=C3)Br)C4=CC=C(C=C4)Br)Cl	4.72125
C_458	Chembl4460518	155527969	CC1=CC2=C(C=C1)N(C(=C2N=NC3=NC(=CS3)C4=CC=C(C=C4)O)O)CC5=CC=CC=C5F	5.27572
C_459	Chembl4460255	155528082	CC1=CC=C(C=C1)C(C2=CNC3=C2C=C(C=C3)C(=O)NNS(=O)(=O)C4=CC=CC(=C4)[N+](=O)[O-])C5=CNC6=C5C=C(C=C6)C(=O)NNS(=O)(=O)C7=CC=CC(=C7)[N+](=O)[O-]	5.67778
C_460	Chembl4461266	155528290	C1=CC(=CC=C1C2=CSC(=N2)N=NC3=C(NC4=C3C=C(C=C4)F)O)F	5.27572
C_461	Chembl4461307	155528293	C1=CC=C2C(=C1)C=C(C(=O)O2)C(=O)N/N=C/C3=CC=CC=C3F	5.95861
C_462	Chembl4461186	155528487	C1=CC=C(C=C1)COC2=CC=C(C=C2)/C=N/C3=NN=C(S3)C4=CC=C(C=C4)Cl	5.63827
C_463	Chembl4461594	155528555	CCOC(=O)C1=C(C[C@H](N([C@@H]1C2=CC=C(C=C2)C)C3=CC(=CC=C3)[N+](=O)[O-])C4=CC=C(C=C4)C)NC5=CC(=CC=C5)[N+](=O)[O-]	5.63827
C_464	Chembl4461780	155528794	C1=CC=C2C(=C1)C=C(C(=O)O2)C3=NN(C(=S)O3)C(C4=CC(=CC=C4)Cl)NC5=CC=C(C=C5)C6=CC=C(C=C6)NC(C7=CC(=CC=C7)Cl)N8C(=S)OC(=N8)C9=CC(=O)OC1=CC=CC=C19	7.1549
C_465	Chembl4461882	155529010	COC1=CC=CC(=C1)C(NC2=CC=C(C=C2)C3=CC=C(C=C3)NC(C4=CC(=CC=C4)OC)N5C(=S)OC(=N5)C6=CC(=O)OC7=CC=CC=C76)N8C(=S)OC(=N8)C9=CC1=CC=CC=C1OC9=O	7.1549
C_466	Chembl4462160	155529019	COC1=C(C(=CC(=C1)C(C2=C(C3=CC=CC=C3OC2=O)N)C4=C(C5=CC=CC=C5OC4=O)N)Br)O	4.69897
C_467	Chembl4462234	155529045	C1=CC=C(C(=C1)CN2C=C(N=N2)CSC3=NC4=C(S3)C=CC(=C4)Cl)F	4.69897
C_468	Chembl4463405	155529760	C1=CC=C2C(=C1)N=C(S2)SCC3=CN(N=N3)CC4=CC(=CC=C4)F	4.69897
C_469	Chembl4462975	155529801	CC1=CC(=CC=C1)NC(=S)NNC(=O)C2=CC=C(C=C2)C3=NN=C(O3)C4=CC=CC=C4Cl	6.39794
C_470	Chembl4463785	155530029	COC1=CC=CC=C1N\2C(=O)/C(=C/C3=CC=C(C=C3)F)/S/C2=N\NC(=O)C4=CC5=CC=CC=C5OC4=O	7.04576
C_471	Chembl4464119	155530094	C1=CC=C2C(=C1)C=C(C(=O)O2)C3=NN(C(=S)O3)C(C4=CC=C(C=C4)Cl)NC5=CC=C(C=C5)OC6=CC=C(C=C6)NC(C7=CC=C(C=C7)Cl)N8C(=S)OC(=N8)C9=CC1=CC=CC=C1OC9=O	7.1549
C_472	Chembl4464685	155530344	C1=CC=C(C(=C1)C2=NN=C(O2)C3=CC=C(C=C3)C(=O)NNC(=S)NC4=CC=C(C=C4)[N+](=O)[O-])Cl	6.39794
C_473	Chembl4464398	155530455	CC(=C)C(COC1=C2C(=CC3=C1OC=C3)C=CC(=O)O2)OC(C)(C)[C@@H](COC4=C5C=CC(=O)OC5=CC6=C4C=CO6)O	5.05552
C_474	Chembl4465117	155530855	CC1=CC=C(C=C1)C(C2=CNC3=C2C=C(C=C3)C(=O)NNS(=O)(=O)C4=CC(=C(C=C4)Cl)Cl)C5=CNC6=C5C=C(C=C6)C(=O)NNS(=O)(=O)C7=CC(=C(C=C7)Cl)Cl	7
C_475	Chembl4465548	155531052	CC1=CC2=C(C=C1)N(C(=C2N=NC3=NC(=CS3)C4=CC=C(C=C4)OC)O)CC5=CC=CC=C5F	5.27572
C_476	Chembl4465477	155531297	C1=CC=C(C=C1)C2=C(C3=C(N2)C=CC(=C3)F)C4=NC(=C(N4C5=CC=CC=C5)C6=CC=CC=C6)C7=CC=CC=C7	5.08092
C_477	Chembl4465310	155531323	CC1=NC=CN1C2=CC=C(C=C2)/C=C/3\C(=O)NC(=O)S3	6.25964
C_478	Chembl4465339	155531355	C[C@H](CN1C=C(N=N1)C2=CC=C(C=C2)C(F)(F)F)OC3=C(C=C(C=C3)C4=CC=C(C=C4)OC)OC	4.85387
C_479	Chembl4465720	155531367	C1=CC=C2C(=C1)C(=C(C(=O)O2)C(C3=CC(=CC=C3)F)C4=C(C5=CC=CC=C5OC4=O)N)N	4.69897
C_480	Chembl4465909	155531645	C1=CC=C(C(=C1)CSC2=NC(=CC(=N2)C3=CC=C(C=C3)Br)C4=CC=C(C=C4)Br)F	4.72125
C_481	Chembl4466757	155531901	COC1=CC(=C(C=C1)NC(=O)CN2C=C(N=N2)COC3=CC(=C4C(=C3)OC5=C(C4=O)C=C(C=C5)Br)O)OC	5.51286
C_482	Chembl4466929	155532040	COC1=CC=CC(=C1)NC(=S)NNC(=O)C2=CC=C(C=C2)C3=NN=C(O3)C4=CC=CC=C4Cl	6.39794
C_483	Chembl4466971	155532338	C1=CC=C2C(=C1)C=C(C(=O)O2)C3=NN(C(=S)O3)C(C4=CC(=CC=C4)Br)NC5=CC=C(C=C5)C6=CC=C(C=C6)NC(C7=CC(=CC=C7)Br)N8C(=S)OC(=N8)C9=CC(=O)OC1=CC=CC=C19	7.1549
C_484	Chembl4467305	155532615	CN(C)C1=CC=C(C=C1)C(NC2=CC=C(C=C2)C3=CC=C(C=C3)NC(C4=CC=C(C=C4)N(C)C)N5C(=S)OC(=N5)C6=CC(=O)OC7=CC=CC=C76)N8C(=S)OC(=N8)C9=CC1=CC=CC=C1OC9=O	7.1549
C_485	Chembl4468394	155532972	CC1=CC=C(C=C1)C(C2=CNC3=C2C=C(C=C3)C(=O)NNS(=O)(=O)C4=CC(=CC(=C4)Cl)Cl)C5=CNC6=C5C=C(C=C6)C(=O)NNS(=O)(=O)C7=CC(=CC(=C7)Cl)Cl	7
C_486	Chembl4468287	155532978	CN1C=C(C2=CC=CC=C21)C3=NN=C(O3)C4=CC=C(C=C4)C(C5=CNC6=C5C=C(C=C6)Br)C7=CNC8=C7C=C(C=C8)Br	4.69897
C_487	Chembl4468873	155533171	CC1=CC=C(C=C1)C(NC2=CC=C(C=C2)NC(C3=CC=C(C=C3)C)N4C(=S)OC(=N4)C5=CC(=O)OC6=CC=CC=C65)N7C(=S)OC(=N7)C8=CC9=CC=CC=C9OC8=O	7.1549
C_488	Chembl4468520	155533188	C1=CC=C2C(=C1)C=C(C(=O)O2)C3=NN(C(=S)O3)C(C4=CC=C(C=C4)[N+](=O)[O-])NC5=CC=C(C=C5)OC6=CC=C(C=C6)NC(C7=CC=C(C=C7)[N+](=O)[O-])N8C(=S)OC(=N8)C9=CC1=CC=CC=C1OC9=O	7.1549
C_489	Chembl4468486	155533261	CC1=CC(=C2C(=C1)C(=C(N2)O)N=NC3=NC(=CS3)C4=CC=C(C=C4)F)C	5.27572
C_490	Chembl4468782	155533288	C1=CC=C2C(=C1)C(=CN2)C3=NN=C(O3)C4=CC=C(C=C4)C(C5=CNC6=CC=CC=C65)C7=CNC8=CC=CC=C87	4.69897
C_491	Chembl4469426	155533632	COC1=CC=CC(=C1)N\2C(=O)/C(=C/C3=CC=C(C=C3)F)/S/C2=N\NC(=O)C4=CC5=CC=CC=C5OC4=O	7.04576
C_492	Chembl4469544	155533650	COC1=C(C=C(C=C1)Br)/C=N/C2=NN=C(S2)C3=CC=C(C=C3)Cl	5.63827
C_493	Chembl4469294	155533786	C1=CC(=CC(=C1)Cl)C(=O)N2C3=CC(=C(C=C3N=N2)Cl)Cl	5.52288
C_494	Chembl4469167	155533843	C1=CC=C(C=C1)C2=C(N=NC(=N2)SCC(=O)NC3=NC(=CS3)C4=CC=C(C=C4)Br)C5=CC=CC=C5	5.55284
C_495	Chembl4471224	155534877	CC(=O)OC1=CC(=CC2=C1C(=O)C3=C(O2)C=CC(=C3)Br)OCC4=CN(N=N4)CC(=O)NC5=C(C=C(C=C5)OC)OC	4.91614
C_496	Chembl4470944	155534978	C1=CC=C2C(=C1)C(=C(C(=O)O2)C(C3=CC=CC=C3Cl)C4=C(C5=CC=CC=C5OC4=O)N)N	4.69897
C_497	Chembl4471582	155535264	C1=CC=C2C=C(C(=CC2=C1)C3=NN=C(S3)N)O	5.63827
C_498	Chembl4472506	155535412	C1=CC=C(C=C1)C(=O)C[C@@H](C2=CC(=CC=C2)Br)C3=CNC4=CC=CC=C43	5.36653
C_499	Chembl4471901	155535503	C1=CC=C(C(=C1)/C=N/C2=NN=C(S2)C3=CC=C(C=C3)Cl)[N+](=O)[O-]	5.63827
C_500	Chembl4472054	155535751	CN1C=C(C2=CC=CC=C21)C3=NN=C(O3)C4=CC=C(C=C4)C(C5=CNC6=C5C=C(C=C6)Cl)C7=CNC8=C7C=C(C=C8)Cl	4.69897
C_501	Chembl4472850	155535829	CC1=CC2=C(C=C1C)N(N=N2)CC(=O)C3=CC(=C(C=C3)Cl)Cl	5.69037
C_502	Chembl4472998	155536131	C1=CC(=C(C=C1NC(=O)CN2C=C(N=N2)COC3=CC(=C4C(=C3)OC5=C(C4=O)C=CC(=C5)Br)O)O)O	5.2815
C_503	Chembl4473217	155536491	C1=CC=C(C(=C1)CN2C=C(N=N2)CSC3=NC4=C(S3)C=CC(=C4)Cl)Br	4.69897
C_504	Chembl4473640	155536535	CN1C=C(C2=CC=CC=C21)C3=NN=C(O3)C4=CC=C(C=C4)C(C5=CNC6=C5C=C(C=C6)Cl)C7=CNC8=CC=CC=C87	5.69897
C_505	Chembl4473758	155536538	CC1=CC=C(C=C1)C2=CC(=C(C=C2)O[C@H](C)CN3C=C(N=N3)C4=CC=C(C=C4)C(F)(F)F)OC	4.85387
C_506	Chembl4473968	155536686	CC1=CC=CC=C1/C=N/NC(=O)C2=CC3=CC=CC=C3OC2=O	5.95861
C_507	Chembl4474751	155537150	C1=CC(=C(C=C1NC(=O)CN2C=C(N=N2)COC3=CC(=C4C(=C3)OC5=C(C4=O)C=C(C=C5)O)O)O)O	5.1512
C_508	Chembl4474603	155537256	CC1=CC(=CC=C1)[C@H](CC(=O)C2=CC=CC=C2)C3=CNC4=CC=CC=C43	5.36653
C_509	Chembl4474453	155537292	COC1=CC(=C(C=C1)O)/C=N/NC(=O)C2=CC3=CC=CC=C3OC2=O	5.95861
C_510	Chembl4475313	155537378	C1=CC=C2C(=C1)C=C(C(=O)O2)C(=O)N/N=C\3/N(C(=O)/C(=C/C4=CC=C(C=C4)F)/S3)C5=CC=CC=C5Cl	7.04576
C_511	Chembl4475117	155537531	CC1=C(C2=CC=CC=C2N1)C3=NN=C(O3)C4=CC=C(C=C4)C(C5=CNC6=C5C=C(C=C6)Cl)C7=CNC8=C7C=C(C=C8)Cl	4.69897
C_512	Chembl4475743	155537893	C1=CC=C2C(=C1)N=C(S2)SCC3=CN(N=N3)CC4=CC(=CC(=C4)Cl)Cl	4.69897
C_513	Chembl4475749	155537956	COC1=CC(=C(C=C1)/C=N/NC(=O)C2=CC3=CC=CC=C3OC2=O)O	5.95861
C_514	Chembl4475632	155538044	CN1C=C(C2=CC=CC=C21)C3=NN=C(O3)C4=CC=C(C=C4)C(C5=CNC6=C5C=C(C=C6)C#N)C7=CNC8=C7C=C(C=C8)C#N	4.69897
C_515	Chembl4476028	155538053	CC1=CSC(=NC(=O)C2=CC=CO2)N1C3=CC(=C(C=C3Cl)Cl)Cl	7
C_516	Chembl4476560	155538463	CC(=O)OC1=CC(=CC2=C1C(=O)C3=C(O2)C=C(C=C3)Br)OCC4=CN(N=N4)CC(=O)NC5=CC(=C(C=C5)OC)OC	4.58319
C_517	Chembl4476702	155538670	C1=CC(=CC=C1C2=NN=C(S2)/N=C/C3=C(C=C(C=C3)Cl)Cl)Cl	5.63827
C_518	Chembl4525043	155538745	CC1=CC=C(C=C1)C2=CSC(=N2)N=NC3=C(N(C4=CC=CC=C43)C)O	5.27572
C_519	Chembl4513279	155538933	CN1C2=CC=CC=C2C(=C1O)N=NC3=NC(=CS3)C4=CC=C(C=C4)OC	5.27572
C_520	Chembl4513326	155538960	COC1=CC=CC(=C1)C(NC2=CC=C(C=C2)NC(C3=CC(=CC=C3)OC)N4C(=S)OC(=N4)C5=CC(=O)OC6=CC=CC=C65)N7C(=S)OC(=N7)C8=CC9=CC=CC=C9OC8=O	7.1549
C_521	Chembl4483090	155539790	C1=CC=C(C=C1)C2=C(C3=CC=CC=C3N2)C(C4=CC=C(C=C4)C5=NN=C(O5)C6=CNC7=CC=CC=C76)C8=C(NC9=CC=CC=C98)C1=CC=CC=C1	4.69897
C_522	Chembl4515488	155539994	CC(=O)OC1=CC(=CC2=C1C(=O)C3=C(O2)C=C(C=C3)Br)OCC4=CN(N=N4)CC(=O)NC5=C(C=C(C=C5)OC)OC	4.89347
C_523	Chembl4516633	155540166	C1=CC=C2C(=C1)N=NN2CC(=O)C3=C(C(=CC=C3)Cl)Cl	5.45967
C_524	Chembl4516653	155540302	CCOC(=O)C1=C(C[C@H](N([C@@H]1C2=CC=C(C=C2)Cl)C3=CC(=CC=C3)F)C4=CC=C(C=C4)Cl)NC5=CC(=CC=C5)F	5.63827
C_525	Chembl4483439	155540379	C1=CC=C(C=C1)CN2C=C(N=N2)CSC3=NC4=C(S3)C=CC(=C4)Cl	4.69897
C_526	Chembl4516968	155540420	C1=CC=C2C(=C1)C=C(C(=O)O2)C(=O)N/N=C\3/N(C(=O)/C(=C/C4=CC=C(C=C4)F)/S3)C5=CC=C(C=C5)Cl	7.04576
C_527	Chembl4519690	155541736	CC1=CC=C(C=C1)C(C2=CNC3=C2C=C(C=C3)C(=O)NNS(=O)(=O)C4=C(C=C(C=C4)[N+](=O)[O-])[N+](=O)[O-])C5=CNC6=C5C=C(C=C6)C(=O)NNS(=O)(=O)C7=C(C=C(C=C7)[N+](=O)[O-])[N+](=O)[O-]	6.30103
C_528	Chembl4519790	155542053	COC1=CC2=C(C=C1)OC3=CC(=CC(=C3C2=O)O)OCC4=CN(N=N4)CC(=O)NC5=C(C=C(C=C5)OC)OC	5.0804
C_529	Chembl4520965	155542409	C1=CC=C(C=C1)C(=O)C[C@@H](C2=CC(=CC=C2)[N+](=O)[O-])C3=CNC4=CC=CC=C43	5.36653
C_530	Chembl4521001	155542582	C1=CC(=CC=C1/C=C/2\C(=O)N(C(=O)S2)CC(=O)O)N3C=CC4=C(C=CN=C43)Br	6.25964
C_531	Chembl4521652	155542676	CC1=CC(=CC=C1)C(C2=C(C3=CC=CC=C3OC2=O)N)C4=C(C5=CC=CC=C5OC4=O)N	4.69897
C_532	Chembl4521721	155542741	COC1=C(C(=CC(=C1)C(C2=C(C3=CC=CC=C3OC2=O)N)C4=C(C5=CC=CC=C5OC4=O)N)Cl)O	4.69897
C_533	Chembl4526013	155543251	COC1=CC=C(C=C1)NC(=S)NNC(=O)C2=CC=C(C=C2)C3=NN=C(O3)C4=CC=CC=C4Cl	6.39794
C_534	Chembl4549579	155543477	CC1=CC=C(C=C1)C2=CSC(=N2)N=NC3=C(N(C4=C3C=C(C=C4)C)CC5=CC=CC=C5F)O	5.27572
C_535	Chembl4526260	155544036	C[C@H](CN1C=C(N=N1)C2=CC=C(C=C2)C(F)(F)F)OC3=C(C=C(C=C3)C4=CC=C(C=C4)[N+](=O)[O-])OC	4.85387
C_536	Chembl4526264	155544045	C1=CC=C(C(=C1)CN2C=C(N=N2)CSC3=NC4=C(S3)C=CC(=C4)Cl)Cl	4.69897
C_537	Chembl4527538	155544268	CC1=CC=C(C=C1)C2=CC(=NC(=N2)SCC3=CC=CC=C3Br)C4=CC=C(C=C4)Br	4.72125
C_538	Chembl4526576	155544539	CC1=CC=C(C=C1)C(C2=CNC3=C2C=C(C=C3)C(=O)NNS(=O)(=O)C4=C(C=C(C=C4)Cl)Cl)C5=CNC6=C5C=C(C=C6)C(=O)NNS(=O)(=O)C7=C(C=C(C=C7)Cl)Cl	7
C_539	Chembl4526585	155544641	C1=CC=C(C=C1)C(=O)C[C@H](C2=CNC3=CC=CC=C32)C4=C(C=CC=C4Cl)Cl	5.36653
C_540	Chembl4565442	155544678	CC1=CC=C(C=C1)C(C2=CNC3=C2C=C(C=C3)C(=O)NNS(=O)(=O)C4=CC(=C(C=C4Cl)Cl)Cl)C5=CNC6=C5C=C(C=C6)C(=O)NNS(=O)(=O)C7=CC(=C(C=C7Cl)Cl)Cl	6.52288
C_541	Chembl4529174	155545216	COC1=CC2=C(C=C1)C(=O)C3=C(C=C(C=C3O2)OCC4=CN(N=N4)CC(=O)NC5=C(C=C(C=C5)OC)OC)O	5.68613
C_542	Chembl4565828	155545371	C1=CC(=CC=C1C2=C(N=NC(=N2)SCC(=O)NC3=NC(=CS3)C4=CC=C(C=C4)Cl)C5=CC=C(C=C5)F)F	5.55284
C_543	Chembl4529524	155545574	CC(=O)OC1=CC(=CC2=C1C(=O)C3=C(O2)C=CC(=C3)OC)OCC4=CN(N=N4)CC(=O)NC5=C(C=C(C=C5)OC)OC	4.37059
C_544	Chembl4532196	155546295	C1=CC=C2C(=C1)C=C(C(=O)O2)C(=O)N/N=C/C3=C(C(=CC=C3)O)O	5.95861
C_545	Chembl4531602	155546457	CC(=O)NC1=CC=C(C=C1)N2C(=C(N=C2C3=C(NC4=C3C=C(C=C4)F)C5=CC=CC=C5)C6=CC=CC=C6)C7=CC=CC=C7	5.08092
C_546	Chembl4531736	155546505	CC1=C(C=C(C=C1)N\2C(=O)/C(=C/C3=CC=C(C=C3)F)/S/C2=N\NC(=O)C4=CC5=CC=CC=C5OC4=O)C	7.04576
C_547	Chembl4532383	155546673	CCOC(=O)C1=C(C[C@H](N([C@@H]1C2=CC=C(C=C2)Cl)C3=CC(=CC=C3)Cl)C4=CC=C(C=C4)Cl)NC5=CC(=CC=C5)Cl	5.63827
C_548	Chembl4533762	155547288	CN(C)C1=CC=C(C=C1)C(NC2=CC=C(C=C2)NC(C3=CC=C(C=C3)N(C)C)N4C(=S)OC(=N4)C5=CC(=O)OC6=CC=CC=C65)N7C(=S)OC(=N7)C8=CC9=CC=CC=C9OC8=O	7.1549
C_549	Chembl4532649	155547853	C1=CC=C2C(=C1)N=NN2C(=O)C3=C(C(=C(C=C3)F)F)Cl	5.24949
C_550	Chembl4535608	155547925	C1=CC=C2C(=C1)C=C(C(=O)O2)C3=NN(C(=S)O3)C(C4=CC(=CC=C4)Cl)NC5=CC=C(C=C5)NC(C6=CC(=CC=C6)Cl)N7C(=S)OC(=N7)C8=CC(=O)OC9=CC=CC=C98	7.1549
C_551	Chembl4535006	155548029	CC1=CC=C(C=C1)C(C2=CNC3=C2C=C(C=C3)C(=O)NNS(=O)(=O)C4=CC=C(C=C4)Br)C5=CNC6=C5C=C(C=C6)C(=O)NNS(=O)(=O)C7=CC=C(C=C7)Br	7
C_552	Chembl4537425	155548091	CC(=C)C(COC1=C2C(=C(C3=C1OC(=O)C=C3)OC)C=CO2)OC(C)(C)[C@@H](COC4=C5C=CC(=O)OC5=CC6=C4C=CO6)O	5.05552
C_553	Chembl4549137	155548830	C1=CC=C2C(=C1)C=C(C(=O)O2)C3=NN(C(=S)O3)C(C4=CC=C(C=C4)Br)NC5=CC=C(C=C5)OC6=CC=C(C=C6)NC(C7=CC=C(C=C7)Br)N8C(=S)OC(=N8)C9=CC1=CC=CC=C1OC9=O	7.1549
C_554	Chembl4538427	155549036	C1=CC=C2C(=C1)C=C(C(=O)O2)C3=NN(C(=S)O3)C(C4=CC=C(C=C4)F)NC5=CC=C(C=C5)NC(C6=CC=C(C=C6)F)N7C(=S)OC(=N7)C8=CC(=O)OC9=CC=CC=C98	7.1549
C_555	Chembl4549180	155549196	CN(C)C1=CC=C(C=C1)C(NC2=CC=C(C=C2)OC3=CC=C(C=C3)NC(C4=CC=C(C=C4)N(C)C)N5C(=S)OC(=N5)C6=CC7=CC=CC=C7OC6=O)N8C(=S)OC(=N8)C9=CC1=CC=CC=C1OC9=O	7.1549
C_556	Chembl4538319	155549256	CC1=CC=C(C=C1)C2=CSC(=N2)N=NC3=C(NC4=C(C=C(C=C43)C)C)O	5.27572
C_557	Chembl4538081	155549339	C1=CC(=C(C=C1O)O)NC(=O)CN2C=C(N=N2)COC3=CC(=C4C(=C3)OC5=C(C4=O)C=C(C=C5)O)O	4.80632
C_558	Chembl4539474	155549603	CC1=CC=C(C=C1)C2=CC(=NC(=N2)SCC3=CC=C(C=C3)Cl)C4=CC=C(C=C4)Br	4.72125
C_559	Chembl4539984	155549930	C1=CC=C2C=C(C=CC2=C1)C(=O)C[C@@H](C3=CC=CS3)C4=CNC5=CC=CC=C54	5.36653
C_560	Chembl4549286	155550722	C1=CC(=CC=C1/C=C/2\C(=O)NC(=O)S2)N3C=CC4=C(C=CN=C43)NC5=CC=C(C=C5)F	6.25964
C_561	Chembl4569072	155550923	C1=CC=C2C(=C1)C(=C(C(=O)O2)C(C3=CC(=CC=C3)Br)C4=C(C5=CC=CC=C5OC4=O)N)N	4.69897
C_562	Chembl4541097	155551194	CC1=C(C2=CC=CC=C2N1C)C(C3=CC=C(C=C3)C4=NN=C(O4)C5=CNC6=CC=CC=C65)C7=C(N(C8=CC=CC=C87)C)C	4.69897
C_563	Chembl4541639	155551356	C1=CC=C(C(=C1)NC2=C3C=CN(C3=NC=C2)C4=CC=C(C=C4)/C=C/5\C(=O)NC(=O)S5)OC(F)(F)F	6.25964
C_564	Chembl4569769	155551754	CC1=C(C2=CC=CC=C2N1)C3=NN=C(O3)C4=CC=C(C=C4)C(C5=CNC6=C5C=C(C=C6)C#N)C7=CNC8=C7C=C(C=C8)C#N	4.69897
C_565	Chembl4543092	155551811	C1=CC=C(C(=C1)C2=NN=C(O2)C3=CC=C(C=C3)C(=O)NNC(=S)NC4=CC=CC=C4Br)Cl	6.39794
C_566	Chembl4576254	155551838	CC(=C)C(COC1=C2C=CC(=O)OC2=CC3=C1C=CO3)OC(C)(C)C(COC4=C5C(=C(C6=C4OC(=O)C=C6)OC)C=CO5)O	5.05552
C_567	Chembl4543995	155552138	C[C@H](CN1C=C(N=N1)C2=CC=C(C=C2)C(F)(F)F)OC3=C(C=C(C=C3)C4=CC=C(C=C4)F)OC	4.85387
C_568	Chembl4547068	155552221	C1=CC=C(C=C1)NN2C(=CSC2=NC3=CC=C(C=C3)Cl)C4=CC=C(C=C4)Cl	5.01773
C_569	Chembl4547082	155552278	CC(C)(C)C1=CC=C(C=C1)CN2C=C(N=N2)CSC3=NC4=CC=CC=C4S3	4.69897
C_570	Chembl4544255	155552319	CN1C=C(C2=CC=CC=C21)C3=NN=C(O3)C4=CC=C(C=C4)C(C5=C(NC6=CC=CC=C65)C7=CC=CC=C7)C8=C(NC9=CC=CC=C98)C1=CC=CC=C1	4.69897
C_571	Chembl4543754	155552510	CC1=CSC(=NC(=O)C2=CC=CC=C2Cl)N1C3=CC(=C(C=C3Cl)Cl)Cl	7
C_572	Chembl4547036	155552582	C1=CC=C(C(=C1)C2=NN=C(O2)C3=CC=C(C=C3)C(=O)NNC(=S)NC4=CC(=C(C=C4)Cl)Cl)Cl	6.39794
C_573	Chembl4544064	155552633	C1=CC=C2C(=C1)C=NN2C3=CC=C(C=C3)/C=C/4\C(=O)NC(=O)S4	6.25964
C_574	Chembl4545537	155552870	C1=CC=C2C(=C1)C=C(C(=O)O2)C(=O)N/N=C/C3=CC=C(C=C3)F	5.95861
C_575	Chembl4545190	155552897	CC1=CC=C(C=C1)C2=CSC(=N2)NC(=O)CSC3=NC(=C(N=N3)C4=CC=C(C=C4)F)C5=CC=C(C=C5)F	5.55284
C_576	Chembl4545401	155552997	C1=CC(=CC=C1C2=CSC(=N2)NC(=O)CSC3=NC(=C(N=N3)C4=CC=C(C=C4)Br)C5=CC=C(C=C5)Br)Br	5.55284
C_577	Chembl4545231	155553123	C1=CC(=CC=C1C2=C(N=NC(=N2)SCC(=O)NC3=NC(=CS3)C4=CC=C(C=C4)Br)C5=CC=C(C=C5)F)F	5.55284
C_578	Chembl4545982	155553329	C1=CC(=CC(=C1)F)CSC2=NC(=CC(=N2)C3=CC(=CC=C3)Br)C4=CC=C(C=C4)Br	4.72125
C_579	Chembl4545784	155553432	CC1=CC2=C(C=C1)NC(=C2N=NC3=NC(=CS3)C4=CC=C(C=C4)O)O	5.27572
C_580	Chembl4576623	155553806	COC1=CC=C(C=C1)N2C(=C(N=C2C3=C(NC4=CC=CC=C43)C5=CC(=CC=C5)Br)C6=CC=CC=C6)C7=CC=CC=C7	5.08092
C_581	Chembl4547928	155554008	CC1=CC=C(C=C1)C(NC2=CC=C(C=C2)OC3=CC=C(C=C3)NC(C4=CC=C(C=C4)C)N5C(=S)OC(=N5)C6=CC7=CC=CC=C7OC6=O)N8C(=S)OC(=N8)C9=CC1=CC=CC=C1OC9=O	7.1549
C_582	Chembl4557896	155554549	C1=CC=C(C=C1)C(=O)C[C@@H](C2=CC=C(C=C2)Br)C3=CNC4=CC=CC=C43	5.36653
C_583	Chembl4557506	155554792	CC1=C(C(=CC=C1)C)N\2C(=O)/C(=C/C3=CC=C(C=C3)F)/S/C2=N\NC(=O)C4=CC5=CC=CC=C5OC4=O	7.04576
C_584	Chembl4550316	155554991	C1=CC(=CC=C1C2=CSC(=N2)N=NC3=C(NC4=C3C=C(C=C4)Cl)O)Br	5.27572
C_585	Chembl4550413	155555150	C1=CC=C(C(=C1)C2=NN=C(O2)C3=CC=C(C=C3)C(=O)NNC(=S)NC4=CC=C(C=C4)Cl)Cl	6.39794
C_586	Chembl4551286	155555166	C1=CC=C(C=C1)C2=C(N(C(=N2)C3=C(NC4=CC=CC=C43)C5=CC(=CC=C5)Br)C6=CC=C(C=C6)Br)C7=CC=CC=C7	5.08092
C_587	Chembl4551296	155555225	C1=CC=C2C(=C1)N=C(S2)SCC3=CN(N=N3)CC4=CC=C(C=C4)Cl	4.69897
C_588	Chembl4553428	155555379	C1=CC=C(C(=C1)C2=NN=C(O2)C3=CC=C(C=C3)C(=O)NNC(=S)NC4=CC(=CC=C4)F)Cl	6.39794
C_589	Chembl4552230	155555472	C1=CC=C2C(=C1)C=C(C(=O)O2)C3=NN(C(=S)O3)C(C4=CC=C(C=C4)Br)NC5=CC=C(C=C5)C6=CC=C(C=C6)NC(C7=CC=C(C=C7)Br)N8C(=S)OC(=N8)C9=CC(=O)OC1=CC=CC=C19	7.1549
C_590	Chembl4551617	155555653	C1=CC=C2C(=C1)C=C(C(=O)O2)C3=NN(C(=S)O3)C(C4=CC=C(C=C4)[N+](=O)[O-])NC5=CC=C(C=C5)NC(C6=CC=C(C=C6)[N+](=O)[O-])N7C(=S)OC(=N7)C8=CC(=O)OC9=CC=CC=C98	7.1549
C_591	Chembl4551747	155555852	CC(C)(C)C1=CC=C(C=C1)CN2C=C(N=N2)CSC3=NC4=C(S3)C=CC(=C4)Cl	4.69897
C_592	Chembl4554161	155555930	CN1C=C(C2=CC=CC=C21)C3=NN=C(O3)C4=CC=C(C=C4)C(C5=CNC6=CC=CC=C65)C7=CNC8=CC=CC=C87	4.69897
C_593	Chembl4554505	155556035	C[C@H](CN1C=C(N=N1)C2=CC=C(C=C2)F)OC3=C(C=C(C=C3)Br)OC	4.85387
C_594	Chembl4554853	155556297	C1=CC=C(C(=C1)C2=NN=C(O2)C3=CC=C(C=C3)C(=O)NNC(=S)NC4=CC=CC=C4Cl)Cl	6.1549
C_595	Chembl4554478	155556557	C1=CC=C(C(=C1)C2=NN=C(O2)C3=CC=C(C=C3)C(=O)NNC(=S)NC4=CC(=CC=C4)[N+](=O)[O-])Cl	6.39794
C_596	Chembl4555132	155556585	CC1=C(C2=CC=CC=C2N1)C3=NN=C(O3)C4=CC=C(C=C4)C(C5=C(NC6=CC=CC=C65)C7=CC=CC=C7)C8=C(NC9=CC=CC=C98)C1=CC=CC=C1	4.69897
C_597	Chembl4554612	155556628	C1=CC(=CC(=C1)[N+](=O)[O-])C2=NN=C(S2)/N=C/C3=C(C=C(C=C3)Cl)Cl	5.63827
C_598	Chembl4556170	155557040	C1=CC=C(C=C1)C(=O)C[C@@H](C2=C(C=C(C=C2)Cl)Cl)C3=CNC4=CC=CC=C43	5.36653
C_599	Chembl4555448	155557333	C1=CC=C(C(=C1)C2=NN=C(O2)C3=CC=C(C=C3)C(=O)NNC(=S)NC4=CC=C(C=C4)Br)Cl	6.39794
C_600	Chembl4559187	155557845	CN1CCN(CC1)CN2C(=S)OC(=N2)CN3C(=NN=C3C4=CC=C(C=C4)Cl)CC5=CC=C(C=C5)OC	5.36653
C_601	Chembl4560628	155558468	C1=CC2=C(C=C1O)OC3=CC(=CC(=C3C2=O)O)OCC4=CN(N=N4)CC(=O)NC5=C(C=C(C=C5)O)O	4.75424
C_602	Chembl4561204	155558478	CC1=CC(=C(C=C1)N\2C(=O)/C(=C/C3=CC=C(C=C3)F)/S/C2=N\NC(=O)C4=CC5=CC=CC=C5OC4=O)C	7.04576
C_603	Chembl4561697	155559088	CC(=CCC/C(=C/CC/C(=C/CC1=C(C(=CC2=C1C(=O)C3=C(C=C(C=C3O2)O)O)O)O)/C)/C)C	4.11805
C_604	Chembl4561766	155559089	CC(=O)OC1=CC(=CC2=C1C(=O)C3=C(O2)C=CC(=C3)Br)OCC4=CN(N=N4)CC(=O)NC5=CC(=C(C=C5)OC)OC	4.49039
C_605	Chembl4564900	155559778	C1=CC(=CC=C1/C=N/C2=NN=C(S2)C3=CC=C(C=C3)Cl)O	5.63827
C_606	Chembl4564699	155559850	CC(=CCC/C(=C/CC/C(=C/CCC(C)(CCC1=C(C(=CC2=C1C(=O)C3=C(C=C(C=C3O2)O)O)O)O)O)/C)/C)C	4.81248
C_607	Chembl4567979	155560301	C1=CC(=C(C=C1O)O)NC(=O)CN2C=C(N=N2)COC3=CC(=C4C(=C3)OC5=C(C4=O)C=CC(=C5)Br)O	5.23136
C_608	Chembl4568178	155560470	CCOC(=O)C1=C(C[C@H](N([C@@H]1C2=CC=C(C=C2)Cl)C3=CC(=CC=C3)Br)C4=CC=C(C=C4)Cl)NC5=CC(=CC=C5)Br	5.63827
C_609	Chembl4568608	155560581	CC1=CC=C(C=C1)C2=CC(=NC(=N2)SCC3=CC(=CC=C3)F)C4=CC(=CC=C4)Br	4.72125
C_610	Chembl4566389	155560899	CC1=CC2=C(C=C1C)N(N=N2)CC(=O)C3=CC=C(C=C3)OC	5.58503
C_611	Chembl4580728	155561331	C1=CC(=C(C=C1NC(=O)CN2C=C(N=N2)COC3=CC(=C4C(=C3)OC5=C(C4=O)C=C(C=C5)Br)O)O)O	5.49894
C_612	Chembl4580943	155561485	COC1=C(C=C(C=C1)NC(=O)CN2C=C(N=N2)COC3=CC(=C4C(=C3)OC5=C(C4=O)C=CC(=C5)Br)O)OC	4.92738
C_613	Chembl4581675	155561638	C[C@H](CN1C=C(N=N1)C2=CC=CC=C2)OC3=C(C=C(C=C3)Br)OC	4.85387
C_614	Chembl4584797	155562117	CC1=C(C2=CC=CC=C2N1C)C(C3=CC=C(C=C3)C4=NN=C(O4)C5=CN(C6=CC=CC=C65)C)C7=C(N(C8=CC=CC=C87)C)C	4.69897
C_615	Chembl4570923	155562458	C1=CC=C2C(=C1)C(=C(C(=O)O2)C(C3=CC=CC=C3F)C4=C(C5=CC=CC=C5OC4=O)N)N	4.69897
C_616	Chembl4570383	155562954	COC1=CC=C(C=C1)N2C(=C(N=C2C3=C(NC4=C3C=C(C=C4)Cl)C5=CC=C(C=C5)Cl)C6=CC=CC=C6)C7=CC=CC=C7	5.08092
C_617	Chembl4570594	155562957	C1=CC(=CC=C1C2=CSC(=N2)NC(=O)CSC3=NC(=C(N=N3)C4=CC=C(C=C4)Br)C5=CC=C(C=C5)Br)Cl	5.55284
C_618	Chembl4573221	155563314	CC1=CC(=CC(=C1C)C)C(=O)N2C3=CC=CC=C3N=N2	5.37366
C_619	Chembl4572048	155563415	C1=CC=C(C(=C1)CSC2=NC(=CC(=N2)C3=CC=C(C=C3)Br)C4=CC=C(C=C4)Br)Cl	4.72125
C_620	Chembl4573584	155563631	CC1=C(C=C(C=C1)C(=O)N2C3=CC(=C(C=C3N=N2)Cl)Cl)C	5.41794
C_621	Chembl4574530	155563923	CN1C=C(C2=CC=CC=C21)C(C3=CC=C(C=C3)C4=NN=C(O4)C5=CNC6=CC=CC=C65)C7=CN(C8=CC=CC=C87)C	4.69897
C_622	Chembl4575673	155564193	C1=CC=C(C(=C1)CSC2=NC(=CC(=N2)C3=CC(=CC=C3)Br)C4=CC=C(C=C4)Br)Cl	4.72125
C_623	Chembl4574481	155564556	C1=CC=C2C(=C1)C=C(C(=O)O2)C3=NN(C(=S)O3)C(C4=CC=C(C=C4)Cl)NC5=CC=C(C=C5)C6=CC=C(C=C6)NC(C7=CC=C(C=C7)Cl)N8C(=S)OC(=N8)C9=CC(=O)OC1=CC=CC=C19	7.1549
C_624	Chembl4577650	155564904	CC1=CC2=C(C=C1C)N(N=N2)CC(=O)C3=CC=CC=C3O	5.48149
C_625	Chembl4578211	155565000	CN1C=C(C2=CC=CC=C21)C3=NN=C(O3)C4=CC=C(C=C4)C(C5=CN(C6=CC=CC=C65)C)C7=CN(C8=CC=CC=C87)C	4.69897
C_626	Chembl4578419	155565007	C1=CC=C(C=C1)C2=CSC(=N2)NC(=O)CSC3=NC(=C(N=N3)C4=CC=C(C=C4)Br)C5=CC=C(C=C5)Br	5.55284
C_627	Chembl4579286	155565566	C1=CC=C(C=C1)C2=C(C3=C(N2)C=CC(=C3)F)C4=NC(=C(N4C5=CC(=CC=C5)Cl)C6=CC=CC=C6)C7=CC=CC=C7	5.08092
C_628	Chembl4580550	155565848	C1=CC(=CC(=C1)F)CN2C=C(N=N2)CSC3=NC4=C(S3)C=CC(=C4)Cl	4.69897
C_629	Chembl4580552	155565849	CC(=CCC/C(=C/CCC(C)(CCC1=C(C(=CC2=C1C(=O)C3=C(C=C(C=C3O2)O)O)O)O)O)/C)C	4.59517
C_630	Chembl4582990	155565952	C1=CC=C(C(=C1)C2=NN=C(O2)C3=CC=C(C=C3)C(=O)NNC(=S)NC4=CC=C(C=C4)C(F)(F)F)Cl	6.22185
C_631	Chembl4582866	155566243	C1=CC=C(C(=C1)C2=NN=C(O2)C3=CC=C(C=C3)C(=O)NNC(=S)NC4=CC=C(C=C4)F)Cl	6.39794
C_632	Chembl4587284	155566721	CC1=C(C2=CC=CC=C2N1)C3=NN=C(O3)C4=CC=C(C=C4)C(C5=C(N(C6=CC=CC=C65)C)C)C7=C(N(C8=CC=CC=C87)C)C	4.69897
C_633	Chembl4586570	155566820	C1=CC(=CC=C1CN2C=C(N=N2)CSC3=NC4=C(S3)C=CC(=C4)Cl)F	4.69897
C_634	Chembl4586665	155566948	C1=CC=C(C(=C1)C2=NN=C(O2)C3=CC=C(C=C3)C(=O)NNC(=S)NC4=CC=CC=C4F)Cl	6.39794
C_635	Chembl4586054	155567023	C[C@H](CN1C=C(N=N1)C2=CC=C(C=C2)C(F)(F)F)OC3=C(C=C(C=C3)Br)OC	4.85387
C_636	Chembl4590536	155567941	CC1=CC(=CC=C1)/C=N/NC(=O)C2=CC3=CC=CC=C3OC2=O	5.95861
C_637	Chembl4590014	155568099	C1=CC(=CC=C1/C=C/2\C(=O)NC(=O)S2)N3C=CC4=C(C=CN=C43)Br	6.25964
C_638	Chembl4590046	155568175	CC1=C(C2=CC=CC=C2N1)C3=NN=C(O3)C4=CC=C(C=C4)C(C5=CNC6=CC=CC=C65)C7=CNC8=CC=CC=C87	4.69897
C_639	Chembl4591646	155568325	CC1=CC(=CC(=C1)N\2C(=O)/C(=C/C3=CC=C(C=C3)F)/S/C2=N\NC(=O)C4=CC5=CC=CC=C5OC4=O)C	7.04576
C_640	Chembl4589823	155568837	CC1=CC(=CC=C1)N\2C(=O)/C(=C/C3=CC=C(C=C3)F)/S/C2=N\NC(=O)C4=CC5=CC=CC=C5OC4=O	7.04576
C_641	Chembl4592050	155569088	CC1=CC=C(C=C1)C(C2=CNC3=C2C=C(C=C3)C(=O)NNS(=O)(=O)C4=C(C(=CC=C4)Cl)Cl)C5=CNC6=C5C=C(C=C6)C(=O)NNS(=O)(=O)C7=C(C(=CC=C7)Cl)Cl	7
C_642	Chembl4593597	155569623	C1=CC=C2C(=C1)N=C(N2CC3=CC=C(C=C3)Cl)C4=CC=C(C=C4)/C=C\5/C(=O)NC(=O)S5	6.26761
C_643	Chembl4593969	155569636	COC1=C(C=CC(=C1)C2=NN=C(S2)/N=C/C3=CC=C(C=C3)O)OCC4=CC=CC=C4	5.63827

## Sheet: Sheet1 (2)
S/N	Compound Name	PubChem CID	Isomeric SMILES	pIC50
1	2,4-Thiazolidinedione	5437	C1C(=O)NC(=O)S1	6.26761
2	Methyl acetoacetate	7757	CC(=O)CC(=O)OC	4.72125
3	Diethyl malonate	7761	CCOC(=O)CC(=O)OCC	5.30103
4	Precose	41774	C[C@@H]1[C@H]([C@@H]([C@H]([C@H](O1)O[C@@H]2[C@H](O[C@@H]([C@@H]([C@H]2O)O)O[C@@H]3[C@H](OC([C@@H]([C@H]3O)O)O)CO)CO)O)O)N[C@H]4C=C([C@H]([C@@H]([C@H]4O)O)O)CO	5.69897
5	Miglustat	51634	CCCCN1C[C@@H]([C@H]([C@@H]([C@H]1CO)O)O)O	5.67778
6	(-)-Catechin	73160	C1[C@H]([C@@H](OC2=CC(=CC(=C21)O)O)C3=CC(=C(C=C3)O)O)O	4.26922
7	N-Methyldeoxynojirimycin	92381	CN1C[C@@H]([C@H]([C@@H]([C@H]1CO)O)O)O	6.92082
8	5-(4-Nitrophenyl)-1,3,4-thiadiazol-2-amine	96637	C1=CC(=CC=C1C2=NN=C(S2)N)[N+](=O)[O-]	5.63827
9	Terphenyllin	100437	COC1=C(C(=C(C(=C1)C2=CC=C(C=C2)O)OC)O)C3=CC=C(C=C3)O	5.31966
10	Butyrolactone i	123740	CC(=CCC1=C(C=CC(=C1)C[C@@]2(C(=C(C(=O)O2)O)C3=CC=C(C=C3)O)C(=O)OC)O)C	4.84832
11	1H-Benzotriazole, 1-benzoyl-5,6-dichloro-	155893	C1=CC=C(C=C1)C(=O)N2C3=CC(=C(C=C3N=N2)Cl)Cl	5.4318
12	(2r,3r,5s,6r)-2,6-Bis(hydroxymethyl)piperidine-3,4,5-triol	159496	C([C@@H]1[C@H](C([C@H]([C@H](N1)CO)O)O)O)O	7.39794
13	Valiolamine	174312	C1[C@@H]([C@@H]([C@H]([C@@H]([C@]1(CO)O)O)O)O)N	5.65758
14	Migalastat	176077	C1[C@@H]([C@H]([C@H]([C@H](N1)CO)O)O)O	5.82391
15	5-(2,4-Dichlorophenyl)-1,3,4-thiadiazol-2-amine	182638	C1=CC(=C(C=C1Cl)Cl)C2=NN=C(S2)N	5.63827
16	3-Hydroxyterphenyllin	191796	COC1=C(C(=C(C(=C1)C2=CC=C(C=C2)O)OC)O)C3=CC(=C(C=C3)O)O	4.94692
17	Valienamine	193758	C1=C([C@H]([C@@H]([C@H]([C@H]1N)O)O)O)CO	4
18	(5,6-Dimethyl-1h-benzotriazol-1-yl)(phenyl)methanone	256338	CC1=CC2=C(C=C1C)N(N=N2)C(=O)C3=CC=CC=C3	5.46852
19	5-(3-Nitrophenyl)-1,3,4-thiadiazol-2-amine	256343	C1=CC(=CC(=C1)[N+](=O)[O-])C2=NN=C(S2)N	5.63827
20	Miglitol	441314	C1[C@@H]([C@H]([C@@H]([C@H](N1CCO)CO)O)O)O	5.4318
21	Voglibose	444020	C1[C@@H]([C@@H]([C@H]([C@@H]([C@]1(CO)O)O)O)O)NC(CO)CO	5.88606
22	1,4-Dideoxy-1,4-imino-d-arabinitol	451991	C1[C@H]([C@@H]([C@H](N1)CO)O)O	4.25964
23	1-Benzoyl-1H-benzotriazole	570059	C1=CC=C(C=C1)C(=O)N2C3=CC=CC=C3N=N2	5.27654
24	5-(4-Chlorophenyl)-1,3,4-thiadiazol-2-amine	668392	C1=CC(=CC=C1C2=NN=C(S2)N)Cl	5.63827
25	2-(Benzotriazol-1-yl)-1-(4-chlorophenyl)ethanone	677475	C1=CC=C2C(=C1)N=NN2CC(=O)C3=CC=C(C=C3)Cl	5.60206
26	Benzotriazol-1-yl-(4-bromo-phenyl)-methanone	693001	C1=CC=C2C(=C1)N=NN2C(=O)C3=CC=C(C=C3)Br	5.49485
27	Benzotriazol-1-yl-(4-methoxyphenyl)methanone	710644	COC1=CC=C(C=C1)C(=O)N2C3=CC=CC=C3N=N2	5.52433
28	Benzotriazol-1-yl-(4-nitrophenyl)methanone	710799	C1=CC=C2C(=C1)N=NN2C(=O)C3=CC=C(C=C3)[N+](=O)[O-]	5.52724
29	2-(1H-1,2,3-Benzotriazol-1-yl)-1-phenylethan-1-one	761839	C1=CC=C(C=C1)C(=O)CN2C3=CC=CC=C3N=N2	5.30892
30	2-(Benzotriazol-1-yl)-1-(4-bromophenyl)ethanone	761840	C1=CC=C2C(=C1)N=NN2CC(=O)C3=CC=C(C=C3)Br	5.5544
31	2-Benzotriazol-1-yl-1-p-tolyl-ethanone	761841	CC1=CC=C(C=C1)C(=O)CN2C3=CC=CC=C3N=N2	5.32057
32	(1H-Benzo[d][1,2,3]triazol-1-yl)(3-methyl-4-nitrophenyl)methanone	764214	CC1=C(C=CC(=C1)C(=O)N2C3=CC=CC=C3N=N2)[N+](=O)[O-]	5.38722
33	Benzotriazol-1-yl-(2,6-difluoro-phenyl)-methanone	772214	C1=CC=C2C(=C1)N=NN2C(=O)C3=C(C=CC=C3F)F	5.2815
34	1-(4-Fluorobenzoyl)-1H-benzotriazole	785793	C1=CC=C2C(=C1)N=NN2C(=O)C3=CC=C(C=C3)F	5.54975
35	1H-Benzotriazol-1-yl(3,4-dimethylphenyl)methanone	789010	CC1=C(C=C(C=C1)C(=O)N2C3=CC=CC=C3N=N2)C	5.31876
36	2-(1H-1,2,3-Benzotriazol-1-yl)-1-(4-phenylphenyl)ethan-1-one	795004	C1=CC=C(C=C1)C2=CC=C(C=C2)C(=O)CN3C4=CC=CC=C4N=N3	5.30277
37	Benzotriazol-1-yl-(3-methylphenyl)methanone	834536	CC1=CC(=CC=C1)C(=O)N2C3=CC=CC=C3N=N2	5.35458
38	1-(2-Methoxybenzoyl)-1H-1,2,3-benzotriazole	898930	COC1=CC=CC=C1C(=O)N2C3=CC=CC=C3N=N2	5.31966
39	4-(5-Amino-[1,3,4]thiadiazol-2-yl)-phenol	936815	C1=CC(=CC=C1C2=NN=C(S2)N)O	5.63827
40	2-Benzotriazolyl-1-(3-nitrophenyl)ethan-1-one	2168077	C1=CC=C2C(=C1)N=NN2CC(=O)C3=CC(=CC=C3)[N+](=O)[O-]	5.39794
41	(3Z)-3-[2-[4-(4-Chlorophenyl)-2-thiazolyl]hydrazono]-1H-indole-2(3H)-one	2814554	C1=CC=C2C(=C1)C(=C(N2)O)N=NC3=NC(=CS3)C4=CC=C(C=C4)Cl	5.27572
42	3,3-Bis(1H-indole-3-yl)-2-indolinone	2883607	C1=CC=C2C(=C1)C(=CN2)C3(C4=CC=CC=C4NC3=O)C5=CNC6=CC=CC=C65	5.22915
43	5-Chloro-3,3-bis(1H-indole-3-yl)indoline-2-one	2948971	C1=CC=C2C(=C1)C(=CN2)C3(C4=C(C=CC(=C4)Cl)NC3=O)C5=CNC6=CC=CC=C65	5.22915
44	3,3-Bis(1-methyl-1H-indole-3-yl)-1H-indole-2(3H)-one	2949282	CN1C=C(C2=CC=CC=C21)C3(C4=CC=CC=C4NC3=O)C5=CN(C6=CC=CC=C65)C	5.22915
45	Chembl4470451	3438551	CCN1C2=C(C=C(C=C2)NC(=O)CSC3=NC4=CC=CC=C4N3)C5=CC=CC=C51	6.76955
46	2-(Benzotriazol-1-yl)-1-(4-methoxyphenyl)ethanone	3812150	COC1=CC=C(C=C1)C(=O)CN2C3=CC=CC=C3N=N2	5.34679
47	Chembl4444070	3846838	COC1=C(C=C(C=C1)Br)C2=NN=C(S2)N	5.63827
48	(3E)-3-{(2E)-[4-(4-Methylphenyl)-1,3-thiazol-2(3H)-ylidene]hydrazinylidene}-1,3-dihydro-2H-indol-2-one	4284022	CC1=CC=C(C=C1)C2=CSC(=N2)N=NC3=C(NC4=CC=CC=C43)O	5.27572
49	5-(2-Nitrophenyl)-1,3,4-thiadiazol-2-amine	4351712	C1=CC=C(C(=C1)C2=NN=C(S2)N)[N+](=O)[O-]	5.63827
50	5-(2,3-Dimethoxy-phenyl)-[1,3,4]thiadiazol-2-ylamine	4366058	COC1=CC=CC(=C1OC)C2=NN=C(S2)N	5.63827
51	Chembl4465201	4596212	CCCCCCCCCCCC(=O)N=NC1=C(NC2=CC=CC=C21)O	5.65758
52	Chembl4466646	4936110	CCCCOC1=CC=C(C=C1)C(=O)N2C3=CC=CC=C3N=N2	5.25181
53	Chembl4451791	5158729	CC1=CC=C(C=C1)C(=O)N=NC2=C(NC3=C2C=C(C=C3)Cl)O	5.65758
54	Quercetin	5280343	C1=CC(=C(C=C1C2=C(C(=O)C3=C(C=C(C=C3O2)O)O)O)O)O	5.10791
55	Genistein	5280961	C1=CC(=CC=C1C2=COC3=CC(=CC(=C3C2=O)O)O)O	5.58336
56	alpha-Mangostin	5281650	CC(=CCC1=C(C2=C(C=C1O)OC3=C(C2=O)C(=C(C(=C3)O)OC)CC=C(C)C)O)C	5.24413
57	7-Geranyloxy-1,3-dihydroxyxanthone	5317563	CC(=CCC/C(=C/COC1=CC2=C(C=C1)OC3=CC(=CC(=C3C2=O)O)O)/C)C	4.68613
58	7,8-Dihydroxy-4-methylcoumarin	5355836	CC1=CC(=O)OC2=C1C=CC(=C2O)O	4.284
59	gamma-Mangostin	5464078	CC(=CCC1=C(C2=C(C=C1O)OC3=C(C2=O)C(=C(C(=C3)O)O)CC=C(C)C)O)C	5.76955
60	beta-Mangostin	5495925	CC(=CCC1=C(C=C2C(=C1O)C(=O)C3=C(O2)C=C(C(=C3CC=C(C)C)OC)O)OC)C	4.64589
61	9-Hydroxycalabaxanthone	5495929	CC(=CCC1=C(C(=CC2=C1C(=O)C3=C(C4=C(C=C3O2)OC(C=C4)(C)C)O)O)OC)C	4.9431
62	Chembl4592051	6407588	CC1=CC=C(C=C1)C2=CSC(=N2)NC(=O)CSC3=NC(=C(N=N3)C4=CC=CC=C4)C5=CC=CC=C5	5.55284
63	2-[(5,6-Diphenyl-1,2,4-triazin-3-yl)sulfanyl]-N-(4-phenyl-1,3-thiazol-2-yl)acetamide	6411033	C1=CC=C(C=C1)C2=CSC(=N2)NC(=O)CSC3=NC(=C(N=N3)C4=CC=CC=C4)C5=CC=CC=C5	5.55284
64	Chembl4566821	6415895	C1=CC=C(C=C1)C2=C(N=NC(=N2)SCC(=O)NC3=NC(=CS3)C4=CC=C(C=C4)F)C5=CC=CC=C5	5.55284
65	Salacinol	6451151	C1[C@H]([C@@H]([C@H]([S+]1C[C@H]([C@H](CO)OS(=O)(=O)[O-])O)CO)O)O	5.3098
66	(2R,3R,5S,6R)-1-Butyl-2,6-bis(hydroxymethyl)piperidine-3,4,5-triol	6475031	CCCCN1[C@@H]([C@H](C([C@H]([C@H]1CO)O)O)O)CO	5.37675
67	2,6-Bis-hydroxymethyl-1-methyl-piperidine-3,4,5-triol	6477160	CN1[C@@H]([C@H](C([C@H]([C@H]1CO)O)O)O)CO	7.22185
68	2-Oxo-N'-[(E)-phenylmethylidene]-2H-chromene-3-carbohydrazide	6870730	C1=CC=C(C=C1)/C=N/NC(=O)C2=CC3=CC=CC=C3OC2=O	5.95861
69	1,3,4-Thiadiazol-2-amine, 5-[4-(dimethylamino)phenyl]-	7479831	CN(C)C1=CC=C(C=C1)C2=NN=C(S2)N	5.63827
70	Chembl4515560	9689210	C1=CC=C2C(=C1)C=C(N2)C(=O)N/N=C/C3=CC=C(C=C3)Cl	5.63827
71	AMP-Deoxynojirimycin	9822159	C1[C@@H]([C@H]([C@@H]([C@H](N1CCCCCOCC23CC4CC(C2)CC(C4)C3)CO)O)O)O	5.52288
72	Methyl (2~{r})-3-(4-Hydroxyphenyl)-2-[(4-Hydroxyphenyl)methyl]-4-Oxidanyl-5-Oxidanylidene-Furan-2-Carboxylate	10405953	COC(=O)[C@]1(C(=C(C(=O)O1)O)C2=CC=C(C=C2)O)CC3=CC=C(C=C3)O	4.06992
73	3,3''-Dihydroxyterphenyllin	10429220	COC1=C(C(=C(C(=C1)C2=CC(=C(C=C2)O)O)OC)O)C3=CC(=C(C=C3)O)O	4.85387
74	2-Benzylidene-6-(4-hydroxy-benzylidene)-cyclohexanone	10589581	C1C/C(=C\C2=CC=CC=C2)/C(=O)/C(=C/C3=CC=C(C=C3)O)/C1	4.37366
75	1,3,7-Trihydroxy-2,4-diisoprenylxanthone	10643491	CC(=CCC1=C(C(=C2C(=C1O)C(=O)C3=C(O2)C=CC(=C3)O)CC=C(C)C)O)C	4.59346
76	4-Methyl-2-pyridin-4-yl-1H-benzimidazole	10656015	CC1=C2C(=CC=C1)NC(=N2)C3=CC=NC=C3	5.27572
77	2-(2-Chlorophenyl)-4-methyl-1H-benzimidazole	11160865	CC1=C2C(=CC=C1)NC(=N2)C3=CC=CC=C3Cl	5.27572
78	4-Methyl-2-(2-nitrophenyl)-benzimidazole	11218984	CC1=C2C(=CC=C1)NC(=N2)C3=CC=CC=C3[N+](=O)[O-]	5.27572
79	Valibose	11630203	C1[C@@H]([C@H]([C@@H]([C@H]([C@H]1NC(CO)CO)O)O)O)CO	6.25964
80	Cochinchinone A	11633740	CC(=CCC/C(=C/CC1=C2C(=C(C(=C1O)CC=C(C)C)O)C(=O)C3=C(O2)C=CC(=C3)O)/C)C	4.75945
81	14-Deoxy-11,12-didehydro-15-p-methoxylbenzylideneandrographolide	11640963	C[C@@]12CC[C@H]([C@@]([C@H]1CCC(=C)[C@H]2/C=C/C3=C/C(=C/C4=CC=C(C=C4)OC)/OC3=O)(C)CO)O	4.79588
82	1-[(2S,3S)-2,3,4-Trihydroxybutyl]-3beta,4alpha-dihydroxy-5beta-(hydroxymethyl)thiolane-1-ium	11748894	C1[C@H]([C@@H]([C@H]([S+]1C[C@H]([C@H](CO)O)O)CO)O)O	5.04576
83	Cowanin	11754819	CC(=CCC/C(=C/CC1=C(C(=CC2=C1C(=O)C3=C(O2)C=C(C(=C3O)CC=C(C)C)O)O)OC)/C)C	4.42713
84	3,3-Bis(1H-indole-3-yl)-5-bromo-2-indolinone	11775074	C1=CC=C2C(=C1)C(=CN2)C3(C4=C(C=CC(=C4)Br)NC3=O)C5=CNC6=CC=CC=C65	5.22915
85	Chembl4473482	13397330	C1=CC=C(C=C1)C2=C(N=NC(=N2)SCC(=O)NC3=NC(=CS3)C4=CC=C(C=C4)Cl)C5=CC=CC=C5	5.55284
86	Chembl4566850	14356503	CC1=CC=C(C=C1)/C=N/NC(=O)C2=CC3=CC=CC=C3OC2=O	5.95861
87	Chembl4165370	14356507	COC1=CC=C(C=C1)/C=N/NC(=O)C2=CC3=CC=CC=C3OC2=O	5.95861
88	Chembl4513806	16095414	C1=CC=C(C=C1)C(=O)C[C@@H](C2=CC=C(C=C2)Cl)C3=CNC4=CC=CC=C43	5.36653
89	(3S)-3-(1H-Indol-3-yl)-1,3-diphenylpropan-1-one	16095545	C1=CC=C(C=C1)[C@H](CC(=O)C2=CC=CC=C2)C3=CNC4=CC=CC=C43	5.36653
90	Chembl4525900	16095547	COC1=CC=C(C=C1)[C@H](CC(=O)C2=CC=CC=C2)C3=CNC4=CC=CC=C43	5.36653
91	15-Benzylidene-14-deoxy-11,12-didehydroandrographolide	16121613	C[C@@]12CC[C@H]([C@@]([C@H]1CCC(=C)[C@H]2/C=C/C3=C/C(=C/C4=CC=CC=C4)/OC3=O)(C)CO)O	4.23657
92	15-(Benzo[1,3]dioxole-5-methanylidene)-14-deoxy-11,12-didehydroandrographolide	16121614	C[C@@]12CC[C@H]([C@@]([C@H]1CCC(=C)[C@H]2/C=C/C3=C/C(=C/C4=CC5=C(C=C4)OCO5)/OC3=O)(C)CO)O	4.08619
93	Chembl4472969	16386607	C1=CC=C2C(=C1)N=CN2C3=CC=C(C=C3)/C=C/4\C(=O)NC(=O)S4	6.25964
94	Chembl4466501	17603805	C1=CC=C2C(=C1)C=C3C=CC=CC3=C2C4=NN=C(S4)N	5.63827
95	Chembl4468056	17603827	C1=CC=C(C=C1)COC2=CC=C(C=C2)C3=NN=C(S3)N	5.63827
96	(1R,3S,6R)-4-Hydroxymethyl-6-octylamino-cyclohex-4-ene-1,2,3-triol	21021619	CCCCCCCCNC1C=C(C(C(C1O)O)O)CO	4.76955
97	2-(4-Fluorophenyl)-4-methyl-1H-1,3-benzodiazole	21682292	CC1=C2C(=CC=C1)NC(=N2)C3=CC=C(C=C3)F	5.27572
98	Chembl4209575	23538861	CC(=CCOC1=CC=C(C=C1)C2=C(C=C(C(=C2O)OC)C3=CC=C(C=C3)O)OC)C	4.75696
99	Prenylterphenyllin	23630784	CC(=CCC1=C(C=CC(=C1)C2=C(C=C(C(=C2O)OC)C3=CC=C(C=C3)O)OC)O)C	4.59007
100	Chembl4544393	23793555	COC1=CC=C(C=C1)C2=CSC(=N2)NC(=O)CSC3=NC(=C(N=N3)C4=CC=CC=C4)C5=CC=CC=C5	5.55284
101	Chembl4435535	24796417	C1=CC(=CC=C1/C=N/C2=NN=C(S2)C3=CC=C(C=C3)Cl)[N+](=O)[O-]	5.63827
102	3,3-Bis(1H-indole-3-yl)-5-methyl-2-indolinone	24873940	CC1=CC2=C(C=C1)NC(=O)C2(C3=CNC4=CC=CC=C43)C5=CNC6=CC=CC=C65	5.22915
103	Aspernolide A	25265784	CC1(CCC2=C(O1)C=CC(=C2)C[C@@]3(C(=C(C(=O)O3)O)C4=CC=C(C=C4)O)C(=O)OC)C	4.32486
104	(1R,3S,6R)-6-Hexylamino-4-hydroxymethyl-cyclohex-4-ene-1,2,3-triol	44384057	CCCCCCNC1C=C(C(C(C1O)O)O)CO	4.30103
105	(S)-3-(2-((4Ar,6aS,7R,10aS,10bR)-3-(3-bromophenyl)-6a,10b-dimethyl-8-methylene-decahydro-1H-naphtho[2,1-d][1,3]dioxin-7-yl)ethylidene)-4-hydroxy-dihydrofuran-2(3H)-one	44411113	C[C@@]12CC[C@@H]3[C@]([C@H]1CCC(=C)[C@H]2C/C=C/4\[C@@H](COC4=O)O)(COC(O3)C5=CC(=CC=C5)Br)C	4
106	3-(2-((1R,4As,5R,6R,8aR)-6-hydroxy-5-(hydroxymethyl)-5,8a-dimethyl-2-methylene-decahydronaphthalen-1-yl)vinyl)-5-(3-phenylallylidene)furan-2(5H)-one	44411422	C[C@@]12CC[C@H]([C@@]([C@H]1CCC(=C)[C@H]2/C=C/C3=C/C(=C/C=C/C4=CC=CC=C4)/OC3=O)(C)CO)O	4.23657
107	14-Deoxy-11,12-didehydro-15-trimethoxylbenzylideneandrographolide	44437482	C[C@@]12CC[C@H]([C@@]([C@H]1CCC(=C)[C@H]2/C=C/C3=C/C(=C/C4=CC(=C(C=C4OC)OC)OC)/OC3=O)(C)CO)O	4.07572
108	14-Deoxy-15-(p-(dimethanylamino)-benzylidene)-11,12-didehydroandrographolide	44437483	C[C@@]12CC[C@H]([C@@]([C@H]1CCC(=C)[C@H]2/C=C/C3=C/C(=C/C4=CC=C(C=C4)N(C)C)/OC3=O)(C)CO)O	4.1549
109	14-Deoxy-11,12-didehydro-15-(-2-furanmethanylidene)-andrographolide	44437486	C[C@@]12CC[C@H]([C@@]([C@H]1CCC(=C)[C@H]2/C=C/C3=C/C(=C/C4=CC=CO4)/OC3=O)(C)CO)O	4
110	[(1R,2R,4Ar,5R,8aS)-1,4a-dimethyl-6-methylidene-5-[(E)-2-[(5E)-5-[(2E,7E)-2-methylnona-2,7-dienylidene]-2-oxofuran-3-yl]ethenyl]-2-(pyridine-3-carbonyloxy)-3,4,5,7,8,8a-hexahydro-2H-naphthalen-1-yl]methyl pyridine-3-carboxylate	44437487	C/C=C/CCC/C=C(\C)/C=C/1\C=C(C(=O)O1)/C=C/[C@@H]2C(=C)CC[C@H]3[C@]2(CC[C@H]([C@@]3(C)COC(=O)C4=CN=CC=C4)OC(=O)C5=CN=CC=C5)C	4.55284
111	15-Benzylidene14-deoxy-11,12-didehydro-3,19-dinicotinateandrographolide	44437488	C[C@@]12CC[C@H]([C@@]([C@H]1CCC(=C)[C@H]2/C=C/C3=C/C(=C\C4=CC=CC=C4)/OC3=O)(C)COC(=O)C5=CN=CC=C5)OC(=O)C6=CN=CC=C6	4.79588
112	[(1R,2R,4Ar,5R,8aS)-5-[(E)-2-[(5E)-5-[(4-chlorophenyl)methylidene]-2-oxofuran-3-yl]ethenyl]-1,4a-dimethyl-6-methylidene-2-(pyridine-3-carbonyloxy)-3,4,5,7,8,8a-hexahydro-2H-naphthalen-1-yl]methyl pyridine-3-carboxylate	44437489	C[C@@]12CC[C@H]([C@@]([C@H]1CCC(=C)[C@H]2/C=C/C3=C/C(=C\C4=CC=C(C=C4)Cl)/OC3=O)(C)COC(=O)C5=CN=CC=C5)OC(=O)C6=CN=CC=C6	5.22185
113	[(1R,2R,4Ar,5R,8aS)-5-[(E)-2-[(5E)-5-[(3-bromophenyl)methylidene]-2-oxofuran-3-yl]ethenyl]-1,4a-dimethyl-6-methylidene-2-(pyridine-3-carbonyloxy)-3,4,5,7,8,8a-hexahydro-2H-naphthalen-1-yl]methyl pyridine-3-carboxylate	44437490	C[C@@]12CC[C@H]([C@@]([C@H]1CCC(=C)[C@H]2/C=C/C3=C/C(=C\C4=CC(=CC=C4)Br)/OC3=O)(C)COC(=O)C5=CN=CC=C5)OC(=O)C6=CN=CC=C6	4.85387
114	[(1R,2R,4Ar,5R,8aS)-5-[(E)-2-[(5E)-5-[[4-(dimethylamino)phenyl]methylidene]-2-oxofuran-3-yl]ethenyl]-1,4a-dimethyl-6-methylidene-2-(pyridine-3-carbonyloxy)-3,4,5,7,8,8a-hexahydro-2H-naphthalen-1-yl]methyl pyridine-3-carboxylate	44437491	C[C@@]12CC[C@H]([C@@]([C@H]1CCC(=C)[C@H]2/C=C/C3=C/C(=C\C4=CC=C(C=C4)N(C)C)/OC3=O)(C)COC(=O)C5=CN=CC=C5)OC(=O)C6=CN=CC=C6	4.60206
115	[(1R,2R,4Ar,5R,8aS)-5-[(E)-2-[(5Z)-5-(furan-2-ylmethylidene)-2-oxofuran-3-yl]ethenyl]-1,4a-dimethyl-6-methylidene-2-(pyridine-3-carbonyloxy)-3,4,5,7,8,8a-hexahydro-2H-naphthalen-1-yl]methyl pyridine-3-carboxylate	44437492	C[C@@]12CC[C@H]([C@@]([C@H]1CCC(=C)[C@H]2/C=C/C3=C/C(=C/C4=CC=CO4)/OC3=O)(C)COC(=O)C5=CN=CC=C5)OC(=O)C6=CN=CC=C6	4.4437
116	[(1R,2R,4Ar,5R,8aS)-5-[(E)-2-[(5E)-5-[(4-methoxyphenyl)methylidene]-2-oxofuran-3-yl]ethenyl]-1,4a-dimethyl-6-methylidene-2-(pyridine-3-carbonyloxy)-3,4,5,7,8,8a-hexahydro-2H-naphthalen-1-yl]methyl pyridine-3-carboxylate	44437493	C[C@@]12CC[C@H]([C@@]([C@H]1CCC(=C)[C@H]2/C=C/C3=C/C(=C\C4=CC=C(C=C4)OC)/OC3=O)(C)COC(=O)C5=CN=CC=C5)OC(=O)C6=CN=CC=C6	4.95861
117	Chembl4214309	51042112	CC(=CCC/C(=C/COC1=C(C(=C2C(=C1)OC3=C(C2=O)C=C(C=C3)O)O)CC=C(C)C)/C)C	4.54668
118	Chembl4549420	53375223	C1=CC=C2C(=C1)C=C(C(=O)O2)C(=O)N/N=C/C3=CC=CC=C3[N+](=O)[O-]	5.95861
119	(2R,3S,4S)-1-[(2S,3S)-3-Ethoxy-2,4-dihydroxybutyl]-2-(hydroxymethyl)thiolan-1-ium-3,4-diol;chloride	54580834	CCO[C@@H](CO)[C@@H](C[S+]1C[C@H]([C@@H]([C@H]1CO)O)O)O.[Cl-]	6.01773
120	(5S,8R,9S,10S,13S,14S,17S)-17-Hydroxy-10,13-dimethyl-1,2,4,5,6,7,8,9,11,12,14,15,16,17-tetradecahydrocyclopenta[a]phenanthren-3-one;(8R,9S,10S,13S,14S,17S)-17-hydroxy-10,13-dimethyl-1,2,4,5,6,7,8,9,11,12,14,15,16,17-tetradecahydrocyclopenta[a]phenanthren-3-one	54584900	C[C@]12CCC(=O)C[C@@H]1CC[C@@H]3[C@@H]2CC[C@]4([C@H]3CC[C@@H]4O)C.C[C@]12CC[C@H]3[C@H]([C@@H]1CC[C@@H]2O)CCC4[C@@]3(CCC(=O)C4)C	4
121	(2R,3S,4S)-1-[(2S,3S)-2,4-Dihydroxy-3-tridecoxybutyl]-2-(hydroxymethyl)thiolan-1-ium-3,4-diol;chloride	54586701	CCCCCCCCCCCCCO[C@@H](CO)[C@@H](C[S+]1C[C@H]([C@@H]([C@H]1CO)O)O)O.[Cl-]	5.95861
122	(2R,3S,4S)-1-[(2S,3S)-2,4-Dihydroxy-3-methoxybutyl]-2-(hydroxymethyl)thiolan-1-ium-3,4-diol;chloride	54587740	CO[C@@H](CO)[C@@H](C[S+]1C[C@H]([C@@H]([C@H]1CO)O)O)O.[Cl-]	5.69897
123	Chembl4579201	54941384	CC1=C2C(=CC=C1)NC(=N2)C3=CC(=CC=C3)O	5.27572
124	2-(2-Fluorophenyl)-4-methyl-1h-benzimidazole	59018257	CC1=C2C(=CC=C1)NC(=N2)C3=CC=CC=C3F	5.27572
125	2-(4-Chlorophenyl)-4-methyl-1H-benzimidazole	59018388	CC1=C2C(=CC=C1)NC(=N2)C3=CC=C(C=C3)Cl	5.27572
126	(2R,3S,4S)-1-[(2S,3S)-2,4-Dihydroxy-3-[(2-nitrophenyl)methoxy]butyl]-2-(hydroxymethyl)thiolan-1-ium-3,4-diol;chloride	60201905	C1[C@H]([C@@H]([C@H]([S+]1C[C@H]([C@H](CO)OCC2=CC=CC=C2[N+](=O)[O-])O)CO)O)O.[Cl-]	6.82391
127	Chembl4567754	60646299	CC1=C2C(=CC=C1)NC(=N2)C3=CC=CS3	5.27572
128	2-(3-Chlorophenyl)-4-methyl-1H-1,3-benzodiazole	60646448	CC1=C2C(=CC=C1)NC(=N2)C3=CC(=CC=C3)Cl	5.27572
129	2-(3-Fluorophenyl)-4-methyl-1H-1,3-benzodiazole	60646537	CC1=C2C(=CC=C1)NC(=N2)C3=CC(=CC=C3)F	5.27572
130	Chembl4585914	60746809	C1=CC=C2C(=C1)N=NN2CC(=O)C3=CC(=CC=C3)Br	5.5544
131	Chembl4567315	60747003	C1=CC=C2C(=C1)N=NN2CC(=O)C3=CC(=C(C=C3)Cl)Cl	5.40894
132	(1S,2S,3R,6S)-6-[[(2R,3S,4S,5R,6S)-4,5-Dihydroxy-6-methoxy-2-methyloxan-3-yl]amino]-4-(hydroxymethyl)cyclohex-4-ene-1,2,3-triol	70682078	C[C@@H]1[C@H]([C@@H]([C@H]([C@H](O1)OC)O)O)N[C@H]2C=C([C@H]([C@@H]([C@H]2O)O)O)CO	5.49485
133	(1S,2S,3R,6S)-6-[[(2S,3S,4S,5R,6S)-4,5-Dihydroxy-2-(hydroxymethyl)-6-methoxyoxan-3-yl]amino]-4-(hydroxymethyl)cyclohex-4-ene-1,2,3-triol	70684192	CO[C@@H]1[C@@H]([C@H]([C@@H]([C@H](O1)CO)N[C@H]2C=C([C@H]([C@@H]([C@H]2O)O)O)CO)O)O	5.14267
134	(1S,2S,3R,4S,5S)-5-[[(2R,3R,4S,5R,6S)-4,5-Dihydroxy-6-methoxy-2-methyloxan-3-yl]amino]-1-(hydroxymethyl)cyclohexane-1,2,3,4-tetrol	70688441	C[C@@H]1[C@@H]([C@@H]([C@H]([C@H](O1)OC)O)O)N[C@H]2C[C@@]([C@H]([C@@H]([C@H]2O)O)O)(CO)O	6.18709
135	(1S,2S,3R,4S,5S)-1-(Hydroxymethyl)-5-[[(1S,2S,3S,4S,6S)-2,3,4-trihydroxy-6-methylcyclohexyl]amino]cyclohexane-1,2,3,4-tetrol	70688442	C[C@H]1C[C@@H]([C@@H]([C@H]([C@H]1N[C@H]2C[C@@]([C@H]([C@@H]([C@H]2O)O)O)(CO)O)O)O)O	7.16749
136	(1S,2S,3R,4S,5S)-5-[[(1S,2S,3S,4S,6S)-4-Amino-2,3-dihydroxy-6-methylcyclohexyl]amino]-1-(hydroxymethyl)cyclohexane-1,2,3,4-tetrol	70688446	C[C@H]1C[C@@H]([C@@H]([C@H]([C@H]1N[C@H]2C[C@@]([C@H]([C@@H]([C@H]2O)O)O)(CO)O)O)O)N	5.82391
137	(1S,2S,3R,4S,5S)-5-[[(2S,3R,4S,5R,6S)-4,5-Dihydroxy-2-(hydroxymethyl)-6-methoxyoxan-3-yl]amino]-1-(hydroxymethyl)cyclohexane-1,2,3,4-tetrol	70692637	CO[C@@H]1[C@@H]([C@H]([C@H]([C@H](O1)CO)N[C@H]2C[C@@]([C@H]([C@@H]([C@H]2O)O)O)(CO)O)O)O	7
138	(1Z,4E)-5-(3,4-Dihydroxyphenyl)-1-hydroxy-1-(2-hydroxyphenyl)penta-1,4-dien-3-one	71569087	C1=CC=C(C(=C1)/C(=C/C(=O)/C=C/C2=CC(=C(C=C2)O)O)/O)O	4.84466
139	1-Hydroxymethyl-5-(2-hydroxy-1-phenyl-ethylamino)-cyclohexane-1,2,3,4-tetraol	73347264	C1[C@@H]([C@@H]([C@H]([C@@H]([C@]1(CO)O)O)O)O)N[C@H](CO)C2=CC=CC=C2	4.46852
140	1-Hydroxymethyl-5-(2-hydroxy-2-phenyl-ethylamino)-cyclohexane-1,2,3,4-tetraol	73350356	C1[C@@H]([C@@H]([C@@H]([C@H]([C@]1(CO)O)O)O)O)NC[C@@H](C2=CC=CC=C2)O	8.23657
141	Chembl4238409	78168139	CCC1C(C(C(C(N1)CC)O)O)O	5
142	Chembl4550935	78908128	CC1=C2C(=CC=C1)NC(=N2)C3=CC(=C(C=C3)OC)O	5.27572
143	Chembl4449615	84410102	CC1=CC2=C(C=C1C)N(N=N2)CC(=O)C3=CC=C(C=C3)Cl	5.65561
144	Chembl4443687	84410550	CC1=CC2=C(C=C1C)N(N=N2)CC(=O)C3=CC=CC=C3	5.46725
145	Chembl4237960	89495334	C1=CN(C(=O)N=C1N)C2[C@@H]([C@@H](C(O2)CO)O)O	5.60206
146	Chembl4451474	101671063	CC(=CCC/C(=C/CC1=C(C(=CC2=C1C(=O)C3=C(O2)C=C(C(=C3O)C/C=C(\C)/CO)O)O)OC)/C)C	4.54212
147	5-(2-Hydroxy-cyclohexylamino)-1-hydroxymethyl-cyclohexane-1,2,3,4-tetraol	101872894	C1CC[C@H]([C@@H](C1)N[C@H]2C[C@@]([C@H]([C@@H]([C@H]2O)O)O)(CO)O)O	8.21467
148	(2R)-1-[4,4-Difluoro-5-(1,1'-biphenyl-4-ylmethoxy)pentyl]-2alpha-(hydroxymethyl)piperidine-3beta,4alpha,5beta-triol	101882899	C1[C@@H]([C@H]([C@@H]([C@H](N1CCCC(COCC2=CC=C(C=C2)C3=CC=CC=C3)(F)F)CO)O)O)O	5.04576
149	Cratoxylone	102004659	CC(=CCC1=C(C(=CC2=C1C(=O)C3=C(O2)C=C(C(=C3O)CCC(C)(C)O)O)O)OC)C	4.51286
150	Chembl4440152	102432416	CC1=CC=C(C=C1)[C@H](CC(=O)C2=CC3=CC=CC=C3C=C2)C4=CNC5=CC=CC=C54	5.36653
151	Chembl4439503	102432417	C1=CC=C(C=C1)[C@H](CC(=O)C2=CC3=CC=CC=C3C=C2)C4=CNC5=CC=CC=C54	5.36653
152	Chembl4202640	102519726	CC(=C)C(CC/C(=C/COC1=CC2=C(C=C1)OC3=CC(=CC(=C3C2=O)O)O)/C)O	4.86328
153	(2R,3R,4R,5S)-2-(Hydroxymethyl)-1-[5-[[4-phenyl-3-(trifluoromethyl)phenyl]methoxy]pentyl]piperidine-3,4,5-triol	118411068	C1[C@@H]([C@H]([C@@H]([C@H](N1CCCCCOCC2=CC(=C(C=C2)C3=CC=CC=C3)C(F)(F)F)CO)O)O)O	5.1549
154	(2R,3R,4R,5S)-2-(Hydroxymethyl)-1-[5-[[4-phenyl-2-(trifluoromethyl)phenyl]methoxy]pentyl]piperidine-3,4,5-triol	118411071	C1[C@@H]([C@H]([C@@H]([C@H](N1CCCCCOCC2=C(C=C(C=C2)C3=CC=CC=C3)C(F)(F)F)CO)O)O)O	5.09691
155	(2R,3R,4R,5S)-1-[5-[(2-Fluoro-4-phenylphenyl)methoxy]pentyl]-2-(hydroxymethyl)piperidine-3,4,5-triol	118411072	C1[C@@H]([C@H]([C@@H]([C@H](N1CCCCCOCC2=C(C=C(C=C2)C3=CC=CC=C3)F)CO)O)O)O	5.60206
156	(2R,3R,4R,5S)-2-(Hydroxymethyl)-1-[5-[(4-phenylphenyl)methoxy]pentyl]piperidine-3,4,5-triol	118411073	C1[C@@H]([C@H]([C@@H]([C@H](N1CCCCCOCC2=CC=C(C=C2)C3=CC=CC=C3)CO)O)O)O	5.69897
157	(2R,3R,4R,5S)-1-[5-[(3-Fluoro-4-phenylphenyl)methoxy]pentyl]-2-(hydroxymethyl)piperidine-3,4,5-triol	118411074	C1[C@@H]([C@H]([C@@H]([C@H](N1CCCCCOCC2=CC(=C(C=C2)C3=CC=CC=C3)F)CO)O)O)O	5.52288
158	(2R,3R,4R,5S)-2-(Hydroxymethyl)-1-[5-[(2-phenylphenyl)methoxy]pentyl]piperidine-3,4,5-triol	118411076	C1[C@@H]([C@H]([C@@H]([C@H](N1CCCCCOCC2=CC=CC=C2C3=CC=CC=C3)CO)O)O)O	5.82391
159	(1S,2S,3R,4S,5S)-5-[Bis(hydroxymethyl)amino]-1-(hydroxymethyl)cyclohexane-1,2,3,4-tetrol	118718367	C1[C@@H]([C@@H]([C@H]([C@@H]([C@]1(CO)O)O)O)O)N(CO)CO	7.82391
160	5-(Cyclohexylmethyl-amino)-1-hydroxymethyl-cyclohexane-1,2,3,4-tetraol	118718368	C1CCC(CC1)CN[C@H]2C[C@@]([C@H]([C@@H]([C@H]2O)O)O)(CO)O	6.61979
161	5-Cyclohexylamino-1-hydroxymethyl-cyclohexane-1,2,3,4-tetraol	118718369	C1CCC(CC1)N[C@H]2C[C@@]([C@H]([C@@H]([C@H]2O)O)O)(CO)O	6.38722
162	5-(4-Bromo-benzylamino)-1-hydroxymethyl-cyclohexane-1,2,3,4-tetraol	118718370	C1[C@@H]([C@@H]([C@H]([C@@H]([C@]1(CO)O)O)O)O)NCC2=CC=C(C=C2)Br	6.63827
163	6-(2-Hydroxy-1-hydroxymethyl-ethylamino)-4-hydroxymethyl-cyclohex-4-ene-1,2,3-triol	118718371	C1=C([C@H]([C@@H]([C@H]([C@H]1NC(CO)CO)O)O)O)CO	5.22915
164	1-Hydroxymethyl-5-phenethylamino-cyclohexane-1,2,3,4-tetraol	118718372	C1[C@@H]([C@@H]([C@H]([C@@H]([C@]1(CO)O)O)O)O)NCCC2=CC=CC=C2	7
165	5-(3,7-Dimethyl-octa-2,6-dienylamino)-1-hydroxymethyl-cyclohexane-1,2,3,4-tetraol	118718373	CC(=CCC/C(=C/CN[C@H]1C[C@@]([C@H]([C@@H]([C@H]1O)O)O)(CO)O)/C)C	6.284
166	1-Hydroxymethyl-5-[(thiophen-2-ylmethyl)-amino]-cyclohexane-1,2,3,4-tetraol	118718375	C1[C@@H]([C@@H]([C@H]([C@@H]([C@]1(CO)O)O)O)O)NCC2=CC=CS2	6.69897
167	5-(3,5-Di-tert-butyl-4-hydroxy-benzylamino)-1-hydroxymethyl-cyclohexane-1,2,3,4-tetraol	118718376	CC(C)(C)C1=CC(=CC(=C1O)C(C)(C)C)CN[C@H]2C[C@@]([C@H]([C@@H]([C@H]2O)O)O)(CO)O	7.36653
168	1-Hydroxymethyl-5-(3-phenyl-allylamino)-cyclohexane-1,2,3,4-tetraol	118718377	C1[C@@H]([C@@H]([C@H]([C@@H]([C@]1(CO)O)O)O)O)NC/C=C/C2=CC=CC=C2	6.56864
169	1-Hydroxymethyl-5-[(pyridin-3-ylmethyl)-amino]-cyclohexane-1,2,3,4-tetraol	118718379	C1[C@@H]([C@@H]([C@H]([C@@H]([C@]1(CO)O)O)O)O)NCC2=CN=CC=C2	6.48149
170	(2R,3R,4R,5S)-2-(Hydroxymethyl)-1-[5-[(3-phenylphenyl)methoxy]pentyl]piperidine-3,4,5-triol	118719919	C1[C@@H]([C@H]([C@@H]([C@H](N1CCCCCOCC2=CC(=CC=C2)C3=CC=CC=C3)CO)O)O)O	5.82391
171	(2R,3R,4R,5S)-2-(Hydroxymethyl)-1-[5-[(1S)-1-(4-phenylphenyl)ethoxy]pentyl]piperidine-3,4,5-triol	118720302	C[C@@H](C1=CC=C(C=C1)C2=CC=CC=C2)OCCCCCN3C[C@@H]([C@H]([C@@H]([C@H]3CO)O)O)O	5.60206
172	4-(1,3-Benzothiazol-2-yl)-N-[(Z)-pyridin-2-ylmethylideneamino]benzamide	118730249	C1=CC=C2C(=C1)N=C(S2)C3=CC=C(C=C3)C(=O)N/N=C\C4=CC=CC=N4	4.99012
173	4-(1,3-Benzothiazol-2-yl)-N-[(E)-thiophen-2-ylmethylideneamino]benzamide	118730252	C1=CC=C2C(=C1)N=C(S2)C3=CC=C(C=C3)C(=O)N/N=C/C4=CC=CS4	5.0716
174	4-(1,3-Benzothiazol-2-yl)-N-[(Z)-furan-2-ylmethylideneamino]benzamide	118730256	C1=CC=C2C(=C1)N=C(S2)C3=CC=C(C=C3)C(=O)N/N=C\C4=CC=CO4	4.89449
175	4-(1,3-Benzothiazol-2-yl)-N-[(E)-(4-nitrophenyl)methylideneamino]benzamide	118730261	C1=CC=C2C(=C1)N=C(S2)C3=CC=C(C=C3)C(=O)N/N=C/C4=CC=C(C=C4)[N+](=O)[O-]	4.57873
176	4-(1,3-Benzothiazol-2-yl)-N-[(E)-(4-fluorophenyl)methylideneamino]benzamide	118730263	C1=CC=C2C(=C1)N=C(S2)C3=CC=C(C=C3)C(=O)N/N=C/C4=CC=C(C=C4)F	5.14752
177	4-(1,3-Benzothiazol-2-yl)-N-[(E)-(3,5-dimethoxyphenyl)methylideneamino]benzamide	118730264	COC1=CC(=CC(=C1)/C=N/NC(=O)C2=CC=C(C=C2)C3=NC4=CC=CC=C4S3)OC	4.79129
178	4-(1,3-Benzothiazol-2-yl)-N-[(E)-benzylideneamino]benzamide	118730265	C1=CC=C(C=C1)/C=N/NC(=O)C2=CC=C(C=C2)C3=NC4=CC=CC=C4S3	5.0942
179	4-(1,3-Benzothiazol-2-yl)-N-[(E)-(3-bromo-4-fluorophenyl)methylideneamino]benzamide	118730266	C1=CC=C2C(=C1)N=C(S2)C3=CC=C(C=C3)C(=O)N/N=C/C4=CC(=C(C=C4)F)Br	4.55253
180	4-(1,3-Benzothiazol-2-yl)-N-[(E)-(4-methoxyphenyl)methylideneamino]benzamide	118730267	COC1=CC=C(C=C1)/C=N/NC(=O)C2=CC=C(C=C2)C3=NC4=CC=CC=C4S3	4.73684
181	4-(1,3-Benzothiazol-2-yl)-N-[(E)-(4-chlorophenyl)methylideneamino]benzamide	118730270	C1=CC=C2C(=C1)N=C(S2)C3=CC=C(C=C3)C(=O)N/N=C/C4=CC=C(C=C4)Cl	5.27491
182	4-(1,3-Benzothiazol-2-yl)-N-[(E)-(3-methoxyphenyl)methylideneamino]benzamide	118730271	COC1=CC=CC(=C1)/C=N/NC(=O)C2=CC=C(C=C2)C3=NC4=CC=CC=C4S3	4.95507
183	4-(1,3-Benzothiazol-2-yl)-N-[(E)-(3-hydroxyphenyl)methylideneamino]benzamide	118730272	C1=CC=C2C(=C1)N=C(S2)C3=CC=C(C=C3)C(=O)N/N=C/C4=CC(=CC=C4)O	5.03574
184	4-(1,3-Benzothiazol-2-yl)-N-[(E)-(3-hydroxy-2-iodo-4-methoxyphenyl)methylideneamino]benzamide	118730275	COC1=C(C(=C(C=C1)/C=N/NC(=O)C2=CC=C(C=C2)C3=NC4=CC=CC=C4S3)I)O	4.34872
185	4-(1,3-Benzothiazol-2-yl)-N-[(E)-(3,5-dihydroxyphenyl)methylideneamino]benzamide	118730277	C1=CC=C2C(=C1)N=C(S2)C3=CC=C(C=C3)C(=O)N/N=C/C4=CC(=CC(=C4)O)O	4.9539
186	Chembl4442533	118855492	C1=CC=C2C(=C1)C=C(N2)C(=O)N/N=C/C3=CC(=CC(=C3)O)O	5.63827
187	Chembl4533183	118855494	COC1=C(C=C(C=C1)/C=N/NC(=O)C2=CC3=CC=CC=C3N2)O	5.63827
188	Chembl4533603	118855496	COC1=C(C(=C(C=C1)/C=N/NC(=O)C2=CC3=CC=CC=C3N2)I)O	5.63827
189	Chembl4538234	119081250	COC1=CC=C(C=C1)/C=N/NC(=O)C2=NC(=CS2)C3=CC4=CC=CC=C4OC3=O	5.20761
190	Chembl4583678	119081260	C1=CC=C2C(=C1)C=C(C(=O)O2)C3=CSC(=N3)C(=O)N/N=C/C4=CC=C(C=C4)Cl	5.20761
191	Chembl4456697	119081261	C1=CC=C2C(=C1)C=C(C(=O)O2)C3=CSC(=N3)C(=O)N/N=C/C4=CC(=CC=C4)Cl	5.20761
192	Chembl4435153	119081262	C1=CC=C2C(=C1)C=C(C(=O)O2)C3=CSC(=N3)C(=O)N/N=C/C4=CC=C(C=C4)C(F)(F)F	5.20761
193	Chembl4521797	119081263	C1=CC=C2C(=C1)C=C(C(=O)O2)C3=CSC(=N3)C(=O)N/N=C/C4=CC=CC=C4F	5.20761
194	Chembl4453289	119081264	C1=CC=C2C(=C1)C=C(C(=O)O2)C3=CSC(=N3)C(=O)N/N=C/C4=CC(=CC=C4)Br	5.20761
195	Chembl4468721	119081265	COC1=CC=CC=C1/C=N/NC(=O)C2=NC(=CS2)C3=CC4=CC=CC=C4OC3=O	5.20761
196	Chembl4452388	121225769	C1=CC=C2C(=C1)C=C(C(=O)O2)C3=CSC(=N3)C(=O)N/N=C/C4=CC(=CC=C4)F	5.20761
197	N-[(E)-(4-Nitrophenyl)methylideneamino]-2-oxochromene-3-carboxamide	122181573	C1=CC=C2C(=C1)C=C(C(=O)O2)C(=O)N/N=C/C3=CC=C(C=C3)[N+](=O)[O-]	5.95861
198	[(3E)-3-[(3,4-Dihydroxyphenyl)methylidene]-2-hydroxycyclohexen-1-yl]-phenylmethanone	122185117	C1C/C(=C\C2=CC(=C(C=C2)O)O)/C(=C(C1)C(=O)C3=CC=CC=C3)O	4.38722
199	2-[4-(Trifluoromethyl)phenyl]-3-(1,4,5-triphenylimidazol-2-yl)-1H-indole	122191974	C1=CC=C(C=C1)C2=C(N(C(=N2)C3=C(NC4=CC=CC=C43)C5=CC=C(C=C5)C(F)(F)F)C6=CC=CC=C6)C7=CC=CC=C7	5.08092
200	Chembl4590962	126715487	CC1=CC=C(C=C1)[C@H](CC(=O)C2=CC=CC=C2)C3=CNC4=CC=CC=C43	5.36653
201	Chembl4441979	126715488	COC1=CC=C(C=C1)[C@H](CC(=O)C2=CC3=CC=CC=C3C=C2)C4=CNC5=CC=CC=C54	5.36653
202	Chembl4456998	126715493	C1=CC=C(C=C1)C(=O)C[C@@H](C2=CC=CS2)C3=CNC4=CC=CC=C43	5.36653
203	Chembl4473090	126715501	C1=CC=C2C=C(C=CC2=C1)C(=O)C[C@@H](C3=CC=C(C=C3)Cl)C4=CNC5=CC=CC=C54	5.36653
204	Chembl4445238	126962135	C1=CC=C(C=C1)CN2C=C(C3=CC=CC=C32)C4(C5=CC=CC=C5NC4=O)C6=CN(C7=CC=CC=C76)CC8=CC=CC=C8	5.22915
205	Chembl4564310	126962136	C1=CC=C2C(=C1)C(=CN2CC3=CC(=CC=C3)F)C4(C5=CC=CC=C5NC4=O)C6=CN(C7=CC=CC=C76)CC8=CC(=CC=C8)F	5.22915
206	Chembl4460080	126962137	C1=CC=C2C(=C1)C(=CN2CC3=CC=C(C=C3)Br)C4(C5=CC=CC=C5NC4=O)C6=CN(C7=CC=CC=C76)CC8=CC=C(C=C8)Br	5.22915
207	(2R,3S,4S)-1-[(2S,3S)-3-(2,2-Dimethylpropoxy)-2,4-dihydroxybutyl]-2-(hydroxymethyl)thiolan-1-ium-3,4-diol;chloride	127048314	CC(C)(C)CO[C@@H](CO)[C@@H](C[S+]1C[C@H]([C@@H]([C@H]1CO)O)O)O.[Cl-]	6.3279
208	(2R,3S,4S)-1-[(2S,3S)-2,4-Dihydroxy-3-(2-methylpropoxy)butyl]-2-(hydroxymethyl)thiolan-1-ium-3,4-diol;chloride	127051169	CC(C)CO[C@@H](CO)[C@@H](C[S+]1C[C@H]([C@@H]([C@H]1CO)O)O)O.[Cl-]	6.16115
209	(2R,3S,4S)-1-[(2S,3S)-2,4-Dihydroxy-3-pentoxybutyl]-2-(hydroxymethyl)thiolan-1-ium-3,4-diol;chloride	127052422	CCCCCO[C@@H](CO)[C@@H](C[S+]1C[C@H]([C@@H]([C@H]1CO)O)O)O.[Cl-]	5.82391
210	(2R,3S,4S)-1-[(2S,3S)-3-Heptoxy-2,4-dihydroxybutyl]-2-(hydroxymethyl)thiolan-1-ium-3,4-diol;chloride	127052423	CCCCCCCO[C@@H](CO)[C@@H](C[S+]1C[C@H]([C@@H]([C@H]1CO)O)O)O.[Cl-]	6.19382
211	Chembl4575035	127053745	C1=CC=C(C(=C1)CN2C=C(C3=CC=CC=C32)C4(C5=CC=CC=C5NC4=O)C6=CN(C7=CC=CC=C76)CC8=CC=CC=C8Cl)Cl	5.22915
212	Chembl4436320	127053746	C1=CC=C(C(=C1)CN2C=C(C3=CC=CC=C32)C4(C5=CC=CC=C5NC4=O)C6=CN(C7=CC=CC=C76)CC8=CC=CC=C8F)F	5.22915
213	Chembl4443865	127053747	CCCN1C=C(C2=CC=CC=C21)C3(C4=CC=CC=C4NC3=O)C5=CN(C6=CC=CC=C65)CCC	5.22915
214	Chembl4435550	127053748	CC(C)N1C=C(C2=CC=CC=C21)C3(C4=CC=CC=C4NC3=O)C5=CN(C6=CC=CC=C65)C(C)C	5.22915
215	Chembl4550304	127053749	CCCCN1C=C(C2=CC=CC=C21)C3(C4=CC=CC=C4NC3=O)C5=CN(C6=CC=CC=C65)CCCC	5.22915
216	Chembl4436361	127053750	CC(C)CN1C=C(C2=CC=CC=C21)C3(C4=CC=CC=C4NC3=O)C5=CN(C6=CC=CC=C65)CC(C)C	5.22915
217	5-[(3,4-Dihydro-2,2-dimethyl-2H-1-benzopyran-6-yl)methyl]-3-hydroxy-4-(4-hydroxyphenyl)-2(5H)-furanone	129774355	CC1(CCC2=C(O1)C=CC(=C2)CC3C(=C(C(=O)O3)O)C4=CC=C(C=C4)O)C	4.93367
218	Chembl4528814	132522820	C1=CC(=CC(=C1)F)C2=C(N=NC(=N2)SCC(COC3=CC4=C(C=C3)C=CC(=O)O4)O)C5=CC(=CC=C5)F	4.49485
219	Chembl4587989	132522821	C1=CC(=CC2=C1C=CC(=O)O2)OCC(CSC3=NC(=C(N=N3)C4=CC=C(C=C4)F)C5=CC=C(C=C5)F)O	4.49485
220	Chembl4469981	132522822	C1=CC=C(C=C1)C2=C(N=NC(=N2)SCC(COC3=CC4=C(C=C3)C=CC(=O)O4)O)C5=CC=CC=C5	4.49485
221	Chembl4579423	132522823	C1=COC(=C1)C2=C(N=NC(=N2)SCC(COC3=CC4=C(C=C3)C=CC(=O)O4)O)C5=CC=CO5	4.49485
222	Chembl4568819	132522824	C1=CC=C2C(=C1)C=C(C(=O)O2)OCC(CSC3=NC(=C(N=N3)C4=CC=CO4)C5=CC=CO5)O	4.49485
223	Chembl4558577	132522825	C1=CC=C2C(=C1)C=C(C(=O)O2)OCC(CSC3=NC(=C(N=N3)C4=CC=C(C=C4)F)C5=CC=C(C=C5)F)O	4.49485
224	Chembl4446517	132522826	C1=CC=C2C(=C1)C=C(C(=O)O2)OCC(CSC3=NC(=C(N=N3)C4=CC(=CC=C4)Br)C5=CC(=CC=C5)Br)O	4.49485
225	Flavipesolide B	132577715	CC1(CCC2=C(O1)C=CC(=C2)CC3=C([C@](OC3=O)(C(=O)OC)O)C4=CC=C(C=C4)O)C	4.98716
226	Flavipesolide C	132577716	CC1(CCC2=C(O1)C=CC(=C2)CC3=C([C@](OC3=O)(C(=O)O)O)C4=CC=C(C=C4)O)C	5.11748
227	2-[4-[[2-(2-Methoxyphenyl)-4,5-diphenylimidazol-1-yl]methyl]triazol-1-yl]-N-(4-methylphenyl)acetamide	134131791	CC1=CC=C(C=C1)NC(=O)CN2C=C(N=N2)CN3C(=C(N=C3C4=CC=CC=C4OC)C5=CC=CC=C5)C6=CC=CC=C6	4.82391
228	N-(2,4-Dichlorophenyl)-2-[4-[[2-(4-fluorophenyl)-4,5-diphenylimidazol-1-yl]methyl]triazol-1-yl]acetamide	134133547	C1=CC=C(C=C1)C2=C(N(C(=N2)C3=CC=C(C=C3)F)CC4=CN(N=N4)CC(=O)NC5=C(C=C(C=C5)Cl)Cl)C6=CC=CC=C6	4.82391
229	2-[4-[[2-(3-Chlorophenyl)-4,5-diphenylimidazol-1-yl]methyl]triazol-1-yl]-N-(4-methoxyphenyl)acetamide	134134001	COC1=CC=C(C=C1)NC(=O)CN2C=C(N=N2)CN3C(=C(N=C3C4=CC(=CC=C4)Cl)C5=CC=CC=C5)C6=CC=CC=C6	4.82391
230	N-(2,4-Dimethylphenyl)-2-[4-[[2-(3-fluorophenyl)-4,5-diphenylimidazol-1-yl]methyl]triazol-1-yl]acetamide	134134009	CC1=CC(=C(C=C1)NC(=O)CN2C=C(N=N2)CN3C(=C(N=C3C4=CC(=CC=C4)F)C5=CC=CC=C5)C6=CC=CC=C6)C	4.82391
231	Methyl 4-[1-[[1-[2-(4-ethoxyanilino)-2-oxoethyl]triazol-4-yl]methyl]-4,5-diphenylimidazol-2-yl]benzoate	134134112	CCOC1=CC=C(C=C1)NC(=O)CN2C=C(N=N2)CN3C(=C(N=C3C4=CC=C(C=C4)C(=O)OC)C5=CC=CC=C5)C6=CC=CC=C6	4.82391
232	2-[4-[[2-(3-Chlorophenyl)-4,5-diphenylimidazol-1-yl]methyl]triazol-1-yl]-N-(4-ethoxyphenyl)acetamide	134134969	CCOC1=CC=C(C=C1)NC(=O)CN2C=C(N=N2)CN3C(=C(N=C3C4=CC(=CC=C4)Cl)C5=CC=CC=C5)C6=CC=CC=C6	4.82391
233	2-[4-[[2-(3-Bromophenyl)-4,5-diphenylimidazol-1-yl]methyl]triazol-1-yl]-N-(2-ethoxyphenyl)acetamide	134137273	CCOC1=CC=CC=C1NC(=O)CN2C=C(N=N2)CN3C(=C(N=C3C4=CC(=CC=C4)Br)C5=CC=CC=C5)C6=CC=CC=C6	4.82391
234	2-[4-[(4,5-Diphenyl-2-thiophen-2-ylimidazol-1-yl)methyl]triazol-1-yl]-N-(4-methoxyphenyl)acetamide	134139205	COC1=CC=C(C=C1)NC(=O)CN2C=C(N=N2)CN3C(=C(N=C3C4=CC=CS4)C5=CC=CC=C5)C6=CC=CC=C6	4.82391
235	N-(2-Ethoxyphenyl)-2-[4-[[2-(2-fluorophenyl)-4,5-diphenylimidazol-1-yl]methyl]triazol-1-yl]acetamide	134140317	CCOC1=CC=CC=C1NC(=O)CN2C=C(N=N2)CN3C(=C(N=C3C4=CC=CC=C4F)C5=CC=CC=C5)C6=CC=CC=C6	4.82391
236	2-[4-[[2-(4-Bromophenyl)-4,5-diphenylimidazol-1-yl]methyl]triazol-1-yl]-N-(4-fluorophenyl)acetamide	134140665	C1=CC=C(C=C1)C2=C(N(C(=N2)C3=CC=C(C=C3)Br)CC4=CN(N=N4)CC(=O)NC5=CC=C(C=C5)F)C6=CC=CC=C6	4.82391
237	2-[4-[[2-(3-Fluorophenyl)-4,5-diphenylimidazol-1-yl]methyl]triazol-1-yl]-N-(2-methylphenyl)acetamide	134148325	CC1=CC=CC=C1NC(=O)CN2C=C(N=N2)CN3C(=C(N=C3C4=CC(=CC=C4)F)C5=CC=CC=C5)C6=CC=CC=C6	4.82391
238	2-[4-[[2-(4-Bromophenyl)-4,5-diphenylimidazol-1-yl]methyl]triazol-1-yl]-N-(2-methylphenyl)acetamide	134149940	CC1=CC=CC=C1NC(=O)CN2C=C(N=N2)CN3C(=C(N=C3C4=CC=C(C=C4)Br)C5=CC=CC=C5)C6=CC=CC=C6	4.82391
239	N-(2,4-Dichlorophenyl)-2-[4-[[2-(3,4-dimethoxyphenyl)-4,5-diphenylimidazol-1-yl]methyl]triazol-1-yl]acetamide	134151767	COC1=C(C=C(C=C1)C2=NC(=C(N2CC3=CN(N=N3)CC(=O)NC4=C(C=C(C=C4)Cl)Cl)C5=CC=CC=C5)C6=CC=CC=C6)OC	4.82391
240	2-[4-[[2-(3-Chlorophenyl)-4,5-diphenylimidazol-1-yl]methyl]triazol-1-yl]-N-(2,4-dimethylphenyl)acetamide	134156711	CC1=CC(=C(C=C1)NC(=O)CN2C=C(N=N2)CN3C(=C(N=C3C4=CC(=CC=C4)Cl)C5=CC=CC=C5)C6=CC=CC=C6)C	4.82391
241	Methyl 4-[1-[[1-[2-(2,5-dichloroanilino)-2-oxoethyl]triazol-4-yl]methyl]-4,5-diphenylimidazol-2-yl]benzoate	134157314	COC(=O)C1=CC=C(C=C1)C2=NC(=C(N2CC3=CN(N=N3)CC(=O)NC4=C(C=CC(=C4)Cl)Cl)C5=CC=CC=C5)C6=CC=CC=C6	4.82391
242	Chembl4476389	135391860	C1=CC=C(C=C1)C2=CC=C(C=C2)C3=CSC(=N3)N/N=C/C4=CC=CC5=CC=CC=C54	5.20761
243	N'-[(E)-(4-Hydroxy-3-methoxyphenyl)methylidene]-1H-indole-2-carbohydrazide	135580822	COC1=C(C=CC(=C1)/C=N/NC(=O)C2=CC3=CC=CC=C3N2)O	5.63827
244	Chembl4558252	135580865	C1=CC=C2C(=C1)C=C(C(=O)O2)C(=O)N/N=C/C3=CC=CC=C3O	5.95861
245	Chembl4217244	135603218	C1=CC=C2C(=C1)C=C(N2)C(=O)N/N=C/C3=CC=C(C=C3)O	5.63827
246	4-(4-Methyl-1H-benzoimidazole-2-yl)phenol	135974165	CC1=C2C(=CC=C1)NC(=N2)C3=CC=C(C=C3)O	5.27572
247	Chembl4529445	136163007	CC1=C2C(=CC=C1)NC(=N2)C3=CC=CC=C3O	5.27572
248	Chembl4475487	136168639	CC1=C2C(=CC=C1)NC(=N2)C3=C(C=C(C=C3)OC)O	5.27572
249	Chembl4482888	136168640	CC1=C2C(=CC=C1)NC(=N2)C3=C(C=CC(=C3)OC)O	5.27572
250	4-(1,3-Benzothiazol-2-yl)-N-[(E)-(2,4,6-trihydroxyphenyl)methylideneamino]benzamide	136180344	C1=CC=C2C(=C1)N=C(S2)C3=CC=C(C=C3)C(=O)N/N=C/C4=C(C=C(C=C4O)O)O	5.07727
251	Chembl4528769	136198571	C1=CC2=C(C=C1Cl)N=C(S2)C3=C(C=CC(=C3)Br)O	4.65758
252	Chembl4445451	136661648	CCCN1C2=CC=CC=C2C(=C1O)N=NC(=O)CC3=C(C=C(C=C3)Cl)Cl	5.65758
253	Chembl4540336	136661649	C1=CC(=C(C=C1CC(=O)N=NC2=C(NC3=C2C=CC(=C3)Br)O)Cl)Cl	5.65758
254	Chembl4458470	136661650	C1=CC(=C(C=C1Cl)Cl)CC(=O)N=NC2=C(NC3=C2C=CC(=C3)Br)O	5.65758
255	Chembl4455386	136661651	C1=CC=C(C(=C1)C(=O)N=NC2=C(NC3=C2C=CC(=C3)Br)O)O	5.65758
256	Chembl4556298	136706650	CC1=C2C(=CC=C1)NC(=N2)C3=CC(=C(C=C3)O)O	5.27572
257	Chembl4447344	136903786	CC1=C2C(=CC=C1)NC(=N2)C3=C(C=C(C=C3)O)O	5.27572
258	Chembl4474005	136927555	CC1=C2C(=CC=C1)NC(=N2)C3=C(C=CC(=C3)O)O	5.27572
259	4-(1,3-Benzothiazol-2-yl)-N-[(E)-(2-hydroxy-5-methoxyphenyl)methylideneamino]benzamide	136961465	COC1=CC(=C(C=C1)O)/C=N/NC(=O)C2=CC=C(C=C2)C3=NC4=CC=CC=C4S3	5.18709
260	4-(1,3-Benzothiazol-2-yl)-N-[(E)-(4-hydroxyphenyl)methylideneamino]benzamide	136961466	C1=CC=C2C(=C1)N=C(S2)C3=CC=C(C=C3)C(=O)N/N=C/C4=CC=C(C=C4)O	4.94731
261	4-(1,3-Benzothiazol-2-yl)-N-[(E)-(2,3-dihydroxyphenyl)methylideneamino]benzamide	136961467	C1=CC=C2C(=C1)N=C(S2)C3=CC=C(C=C3)C(=O)N/N=C/C4=C(C(=CC=C4)O)O	4.95001
262	4-(1,3-Benzothiazol-2-yl)-N-[(E)-(2-hydroxy-4-methoxyphenyl)methylideneamino]benzamide	136961468	COC1=CC(=C(C=C1)/C=N/NC(=O)C2=CC=C(C=C2)C3=NC4=CC=CC=C4S3)O	5.15677
263	4-(1,3-Benzothiazol-2-yl)-N-[(E)-(2-hydroxyphenyl)methylideneamino]benzamide	136961469	C1=CC=C(C(=C1)/C=N/NC(=O)C2=CC=C(C=C2)C3=NC4=CC=CC=C4S3)O	5.25571
264	4-(1,3-Benzothiazol-2-yl)-N-[(E)-(3,4-dihydroxyphenyl)methylideneamino]benzamide	136961470	C1=CC=C2C(=C1)N=C(S2)C3=CC=C(C=C3)C(=O)N/N=C/C4=CC(=C(C=C4)O)O	4.82131
265	4-(1,3-Benzothiazol-2-yl)-N-[(E)-(2,4-dihydroxyphenyl)methylideneamino]benzamide	136961471	C1=CC=C2C(=C1)N=C(S2)C3=CC=C(C=C3)C(=O)N/N=C/C4=C(C=C(C=C4)O)O	5.25337
266	4-(1,3-Benzothiazol-2-yl)-N-[(E)-(3-bromo-4-hydroxyphenyl)methylideneamino]benzamide	136961472	C1=CC=C2C(=C1)N=C(S2)C3=CC=C(C=C3)C(=O)N/N=C/C4=CC(=C(C=C4)O)Br	5.09313
267	4-(1,3-Benzothiazol-2-yl)-N-[(E)-(4-hydroxy-3-methoxyphenyl)methylideneamino]benzamide	136961473	COC1=C(C=CC(=C1)/C=N/NC(=O)C2=CC=C(C=C2)C3=NC4=CC=CC=C4S3)O	4.27295
268	4-(1,3-Benzothiazol-2-yl)-N-[(E)-(2,5-dihydroxyphenyl)methylideneamino]benzamide	136961474	C1=CC=C2C(=C1)N=C(S2)C3=CC=C(C=C3)C(=O)N/N=C/C4=C(C=CC(=C4)O)O	4.92628
269	(3Z)-3-[[4-(4-Fluorophenyl)thiazol-2-yl]hydrazono]indolin-2-one	136961580	C1=CC=C2C(=C1)C(=C(N2)O)N=NC3=NC(=CS3)C4=CC=C(C=C4)F	5.27572
270	Chembl4469378	136965669	CC1=C2C(=CC=C1)NC(=N2)C3=C(C(=CC=C3)O)O	5.27572
271	Chembl4576919	137001841	C1=CC=C2C(=C1)C=C(C(=O)O2)C3=CSC(=N3)C(=O)N/N=C/C4=CC=CC=C4O	5.20761
272	Chembl4573047	137001842	C1=CC=C2C(=C1)C=C(C(=O)O2)C3=CSC(=N3)C(=O)N/N=C/C4=CC=C(C=C4)O	5.20761
273	Chembl4574133	137001843	CC(C)(C)C1=CC(=C(C(=C1)C(C)(C)C)O)/C=N/NC(=O)C2=NC(=CS2)C3=CC4=CC=CC=C4OC3=O	5.20761
274	Chembl4129528	137001844	C1=CC=C2C(=C1)C=C(C(=O)O2)C3=CSC(=N3)C(=O)N/N=C/C4=C(C(=CC(=C4)Cl)Cl)O	5.20761
275	Chembl4553128	137001845	C1=CC=C2C(=C1)C=C(C(=O)O2)C3=CSC(=N3)C(=O)N/N=C/C4=CC(=C(C=C4)O)F	5.20761
276	Chembl4460908	137001846	C1=CC=C2C(=C1)C=C(C(=O)O2)C3=CSC(=N3)C(=O)N/N=C/C4=C(C=CC(=C4)Cl)O	5.20761
277	Chembl4553656	137001847	COC1=CC(=C(C=C1)/C=N/NC(=O)C2=NC(=CS2)C3=CC4=CC=CC=C4OC3=O)O	5.20761
278	Chembl4516889	137001849	C1=CC=C2C(=C1)C=C(C(=O)O2)C3=CSC(=N3)C(=O)N/N=C/C4=CC(=C(C=C4)O)O	5.20761
279	Chembl4466503	137014966	C1=CC=C2C(=C1)C=C(N2)C(=O)N/N=C/C3=CC(=C(C(=C3)O)O)O	5.63827
280	Chembl4559817	137014967	C1=CC=C2C(=C1)C=C(N2)C(=O)N/N=C/C3=C(C=C(C=C3O)O)O	5.63827
281	Chembl4471072	137014968	C1=CC=C2C(=C1)C=C(N2)C(=O)N/N=C/C3=C(C=CC(=C3)O)O	5.63827
282	Chembl4525854	137014969	C1=CC=C2C(=C1)C=C(N2)C(=O)N/N=C/C3=CC(=C(C=C3)O)O	5.63827
283	Chembl4593066	137014970	C1=CC=C2C(=C1)C=C(N2)C(=O)N/N=C/C3=C(C(=CC=C3)O)O	5.63827
284	Chembl4476335	137014971	C1=CC=C2C(=C1)C=C(N2)C(=O)N/N=C/C3=CC=CC=C3O	5.63827
285	Chembl4438611	137014972	COC1=CC(=C(C=C1)O)/C=N/NC(=O)C2=CC3=CC=CC=C3N2	5.63827
286	Chembl4526446	137179324	C1=CC=C2C(=C1)C(=C(N2)O)N=NC(=O)COC3=CC4=C(C=C3)C=CC(=O)O4	5.60206
287	Chembl4553582	137179325	CC1=CC2=C(C=C1)NC(=C2N=NC(=O)COC3=CC4=C(C=C3)C=CC(=O)O4)O	5.60206
288	Chembl4435626	137179326	CC1=CC(=C2C(=C1)C(=C(N2)O)N=NC(=O)COC3=CC4=C(C=C3)C=CC(=O)O4)C	5.60206
289	Chembl4463121	137179327	C1=CC(=CC2=C1C=CC(=O)O2)OCC(=O)N=NC3=C(NC4=C3C=C(C=C4)F)O	5.60206
290	Chembl4532650	137179328	C1=CC(=CC2=C1C=CC(=O)O2)OCC(=O)N=NC3=C(NC4=C3C=C(C=C4)Cl)O	5.60206
291	Chembl4578640	137179329	C1=CC(=CC2=C1C=CC(=O)O2)OCC(=O)N=NC3=C(NC4=C3C=C(C=C4)Br)O	5.60206
292	Chembl4471443	137179330	C1=CC(=CC2=C1C=CC(=O)O2)OCC(=O)N=NC3=C(NC4=C3C=C(C=C4)[N+](=O)[O-])O	5.60206
293	Chembl4561189	137179331	CN1C2=CC=CC=C2C(=C1O)N=NC(=O)COC3=CC4=C(C=C3)C=CC(=O)O4	5.60206
294	Chembl4568489	137179332	C1=CC=C(C=C1)CN2C3=CC=CC=C3C(=C2O)N=NC(=O)COC4=CC5=C(C=C4)C=CC(=O)O5	5.60206
295	Chembl4438638	137179333	C1=CC=C(C(=C1)CN2C3=CC=CC=C3C(=C2O)N=NC(=O)COC4=CC5=C(C=C4)C=CC(=O)O5)F	5.60206
296	Chembl4475058	137179334	C1=CC=C2C(=C1)C(=C(N2CC3=CC(=CC=C3)F)O)N=NC(=O)COC4=CC5=C(C=C4)C=CC(=O)O5	5.60206
297	Chembl4441977	137179335	C1=CC=C(C(=C1)CN2C3=CC=CC=C3C(=C2O)N=NC(=O)COC4=CC5=C(C=C4)C=CC(=O)O5)Cl	5.60206
298	Chembl4518046	137179336	C1=CC=C2C(=C1)C(=C(N2CC3=CC=C(C=C3)Br)O)N=NC(=O)COC4=CC5=C(C=C4)C=CC(=O)O5	5.60206
299	Chembl4587269	137179337	CC1=CC2=C(C=C1)N(C(=C2N=NC(=O)COC3=CC4=C(C=C3)C=CC(=O)O4)O)CC5=CC=CC=C5F	5.60206
300	Chembl4537391	137179338	CC1=CC2=C(C=C1)N(C(=C2N=NC(=O)COC3=CC4=C(C=C3)C=CC(=O)O4)O)CC5=CC(=CC=C5)F	5.60206
301	Chembl4516073	137179339	C1=CC=C(C(=C1)CN2C3=C(C=C(C=C3)Cl)C(=C2O)N=NC(=O)COC4=CC5=C(C=C4)C=CC(=O)O5)F	5.60206
302	Chembl4545087	137179340	C1=CC(=CC(=C1)F)CN2C3=C(C=C(C=C3)Cl)C(=C2O)N=NC(=O)COC4=CC5=C(C=C4)C=CC(=O)O5	5.60206
303	Chembl4581970	137179341	C1=CC=C(C=C1)CN2C3=C(C=C(C=C3)Br)C(=C2O)N=NC(=O)COC4=CC5=C(C=C4)C=CC(=O)O5	5.60206
304	Chembl4583142	137179342	C1=CC=C(C(=C1)CN2C3=C(C=C(C=C3)Br)C(=C2O)N=NC(=O)COC4=CC5=C(C=C4)C=CC(=O)O5)Cl	5.60206
305	Chembl4452470	137179343	C1=CC(=CC2=C1C=CC(=O)O2)OCC(=O)N=NC3=C(N(C4=C3C=C(C=C4)Br)CC5=CC=C(C=C5)Br)O	5.60206
306	Chembl4161936	137242181	C1=CC=C2C(=C1)C=C(C(=O)O2)C(=O)N/N=C/C3=C(C=C(C=C3)O)O	5.95861
307	Chembl4531264	139231919	C1=CC=C(C=C1)C(C2=C(C3=CC=CC=C3OC2=O)N)C4=C(C5=CC=CC=C5OC4=O)N	4.69897
308	Chembl4214649	139589754	CC1=CC(=CC(=C1C(=O)O[C@H]2[C@@H]3COC(=CC3=CC(=O)[C@@]2(C)O)/C=C/[C@H](C)O)O)O	4.10458
309	Chembl4215785	139589755	CC1=CC(=CC(=C1C(=O)O[C@H]2[C@@H]3COC(=CC3=CC(=O)[C@@]2(C)O)/C=C/C=O)O)O	4.64016
310	Chembl4556172	141348410	C1=CC=C2C(=C1)C(=C(C(=O)O2)C(C3=CC=C(C=C3)[N+](=O)[O-])C4=C(C5=CC=CC=C5OC4=O)N)N	4.69897
311	Chembl4459976	141348411	CC1=CC=C(C=C1)C(C2=C(C3=CC=CC=C3OC2=O)N)C4=C(C5=CC=CC=C5OC4=O)N	4.69897
312	Chembl4472698	141734915	COC1=CC=CC(=C1)C(C2=C(C3=CC=CC=C3OC2=O)N)C4=C(C5=CC=CC=C5OC4=O)N	4.69897
313	Chembl4468008	141734918	C1=CC=C2C(=C1)C(=C(C(=O)O2)C(C3=CC=C(C=C3)O)C4=C(C5=CC=CC=C5OC4=O)N)N	4.69897
314	Chembl4162593	145959976	C[C@@H]([C@@H](C1=CC(=C(C=C1OC)OC)OC)OC)O	4.09366
315	Chembl4127059	145963604	CC1=CC=C(C=C1)N\2C(=O)/C(=C/C3=CC=C(C=C3)F)/S/C2=N\NC(=O)C4=CC5=CC=CC=C5OC4=O	7.04576
316	Chembl4209580	145963815	CCCOC1=CC=C(C=C1)C2=C(C=C(C(=C2OCCC)OC)C3=CC=C(C=C3)O)OC	4.97062
317	Chembl4210289	145963840	COC1=C(C(=C(C(=C1)C2=CC=C(C=C2)O)OC)OC(=O)C3=CC=CO3)C4=CC=C(C=C4)O	4.451
318	Chembl4211872	145963896	COC1=C(C(=C(C(=C1C2=CC=C(C=C2)O)O)OC)C3=CC=C(C=C3)O)Br	5.1463
319	Chembl4209056	145964250	COC1=C(C(=C(C(=C1)C2=CC=C(C=C2)OCC=C)OC)OCC=C)C3=CC=C(C=C3)O	5.057
320	Chembl4208620	145964468	C1=CC(=C(C=C1O)O)/C(=C/C(=O)/C=C/C2=C(C=CC(=C2)O)O)/O	4.69897
321	Chembl4213599	145964658	CC1(CCC2=C(O1)C=CC(=C2)CC3=C(C(OC3=O)O)C4=CC=C(C=C4)O)C	4.87419
322	Chembl4212356	145964828	C1=CC(=C(C=C1O)/C=C/C(=O)/C=C(/C2=C(C=CC(=C2)O)O)\O)O	4.70774
323	Chembl4210494	145965222	CC(C)CCOC1=C(C(=CC(=C1C2=CC=C(C=C2)O)OC)C3=CC=C(C=C3)O)OC	5.06651
324	Chembl4213451	145965338	COC1=C(C(=C(C(=C1)C2=CC=C(C=C2)O)OC)OCC=C)C3=CC=C(C=C3)O	4.07676
325	Chembl4212935	145966248	C1C/C(=C\C2=CC=CC=C2)/C(=O)/C(=C/C3=CC(=CC=C3)O)/C1	4.54668
326	Chembl4213017	145966252	COC1=C(C(=C(C(=C1)C2=CC=C(C=C2)OCCBr)OC)O)C3=CC=C(C=C3)O	4.79317
327	Chembl4213889	145966541	CCCOC1=CC=C(C=C1)C2=C(C=C(C(=C2O)OC)C3=CC=C(C=C3)O)OC	4.91009
328	Chembl4211347	145966678	COC1=C(C(=C(C(=C1C2=CC=C(C=C2)O)O)OC)C3=CC=C(C=C3)O)Cl	4.50446
329	Chembl4211682	145966924	CC(=CCC/C(=C/CC1=C(C(=C(C2=C1OC3=C(C2=O)C=C(C=C3)O)O)CC(C(=C)C)O)O)/C)C	5.31876
330	Chembl4213032	145966975	C1=COC(=C1)/C=C/C(=O)/C=C(/C2=C(C=CC(=C2)O)O)\O	4.85078
331	Chembl4208759	145967044	C1C/C(=C\C2=CC=CC=C2)/C(=O)/C(=C/C3=CC(=C(C=C3)O)O)/C1	4.6925
332	Chembl4211086	145967377	COC1=C(C(=C(C(=C1)C2=CC=C(C=C2)OCC3=CC=CC=C3)OC)O)C4=CC=C(C=C4)O	4.90309
333	Chembl4218969	145969640	CC(=CCOC1=CC=C(C=C1)C2=CC(=C(C(=C2OC)OCC=C(C)C)C3=CC=C(C=C3)O)OC)C	4.27491
334	Chembl4218731	145969860	CC1(C(OC2=C1C3=C(C(=C2)O)C(=O)C4=C(O3)C(=C(C=C4)O)OC)CO)C	4.13847
335	Chembl4218824	145970308	CCCOC1=C(C(=CC(=C1C2=CC=C(C=C2)O)OC)C3=CC=C(C=C3)O)OC	4.71444
336	Chembl4217433	145972163	COC1=C(C(=C(C(=C1)C2=CC=C(C=C2)O)OC)OCCBr)C3=CC=C(C=C3)O	4.72584
337	Chembl4216866	145972609	CC(=CCC1=C(C=CC(=C1)CC2=C([C@H](OC2=O)OC)C3=CC=C(C=C3)O)O)C	5.06298
338	Chembl4176304	145973828	C1=CC=C2C(=C1)C=C(C(=O)O2)C(=O)N/N=C/C3=CC=NC=C3	5.95861
339	Chembl4215150	145973915	C1=CC(=CC(=C1)O)/C=C/C(=O)/C=C(/C2=C(C=CC(=C2)Cl)O)\O	4.4389
340	Chembl4215507	145973934	COC1=C(C(=C(C(=C1)C2=CC=C(C=C2)OCC#C)OC)OCC#C)C3=CC=C(C=C3)O	4.6968
341	Chembl4216906	145974223	CCCOC1=CC=C(C=C1)C2=CC(=C(C(=C2OC)OCCC)C3=CC=C(C=C3)O)OC	5.06098
342	Chembl4217851	145974284	COC1=C(C(=C(C(=C1)C2=CC=C(C=C2)OCC=C)OC)O)C3=CC=C(C=C3)O	4.57675
343	Chembl4216309	145974668	C1=CC(=C(C=C1/C=C/C(=O)/C=C(/C2=C(C=CC(=C2)Cl)O)\O)O)O	4.82102
344	Chembl4217611	145974739	C1=CC=C(C(=C1)/C(=C/C(=O)/C=C/C2=C(C=C(C=C2)O)O)/O)O	4.39041
345	Chembl4216316	145974910	CCCOC1=CC=C(C=C1)C2=CC(=C(C(=C2OC)O)C3=CC=C(C=C3)O)OC	5
346	Chembl4202793	145975037	COC1=C(C(=C(C(=C1)C2=CC=C(C=C2)OCC3=CC=C(C=C3)C4=CC=CC=C4)OC)O)C5=CC=C(C=C5)O	4.91364
347	Chembl4208135	145975482	CC(=CCCC(C)(C1CC2=C3C(=C(C(=C2O1)CC=C(C)C)O)C(=O)C4=C(O3)C=CC(=C4)O)O)C	4.79317
348	Chembl4204289	145976069	COC1=C(C(=C(C(=C1)C2=CC=C(C=C2)OCCBr)OC)OCCBr)C3=CC=C(C=C3)O	5.17587
349	Chembl4205623	145976610	CC(C)CCOC1=CC=C(C=C1)C2=CC(=C(C(=C2OC)O)C3=CC=C(C=C3)O)OC	4.84466
350	Chembl4206986	145976670	COC1=C(C(=C(C(=C1)C2=CC=C(C=C2)O)O)O)C3=CC=C(C=C3)O	4.87943
351	Chembl4206199	145976888	COC1=C(C(=C(C(=C1)C2=CC=C(C=C2)O)OC)O)C3=CC=C(C=C3)OCC4=CC=CC=C4	4.90309
352	Chembl4207664	145977197	COC1=C(C(=C(C(=C1)C2=CC=C(C=C2)O)OC)OCC3=CC=CC=C3)C4=CC=C(C=C4)O	4.71897
353	Chembl4206708	145977661	CC(=CCOC1=C(C(=CC(=C1C2=CC=C(C=C2)O)OC)C3=CC=C(C=C3)O)OC)C	4.63078
354	Chembl4203265	145977996	CC(=CCCC(=C)C(CC1=C2C(=C(C(=C1O)CC=C(C)C)O)C(=O)C3=C(O2)C=CC(=C3)O)O)C	4.99568
355	Chembl4206131	145978101	COC1=C(C(=C(C(=C1)C2=CC=C(C=C2)O)OC)O)C3=CC=C(C=C3)OCC=C	4.49214
356	Chembl4204714	145978278	CC(=CCOC1=CC=C(C=C1)C2=CC(=C(C(=C2OC)O)C3=CC=C(C=C3)O)OC)C	4.6968
357	Chembl4208107	145978407	COC1=C(C(=C(C(=C1)C2=CC=C(C=C2)O)OC)O)C3=CC=C(C=C3)OCCBr	4.74473
358	Chembl4207509	145978619	C1=CC(=CC=C1C2=CC(=O)C(=C(C2=O)O)C3=CC=C(C=C3)O)O	4.64397
359	Chembl4278947	145978931	C1=CC=C2C(=C1)C(=O)N(C2=O)COC3=C(C=C(C=C3)[N+](=O)[O-])/C=C\4/C(=O)NC(=S)S4	4.44624
360	Chembl4280619	145979451	COC1=C(C=CC(=C1)/C=C\2/C(=O)NC(=S)S2)OCN3C(=O)C4=CC=CC=C4C3=O	4.7929
361	Chembl4281051	145979918	CCOC1=C(C=CC(=C1)/C=C\2/C(=O)NC(=S)S2)OCN3C(=O)C4=CC=CC=C4C3=O	5.11238
362	Chembl4282143	145981550	COC1=CC(=CC(=C1OCN2C(=O)C3=CC=CC=C3C2=O)OC)/C=C\4/C(=O)NC(=S)S4	4.40001
363	Chembl4277201	145984650	COC1=C(C=CC(=C1)/C=C\2/C(=O)NC(=O)S2)OCN3C(=O)C4=CC=CC=C4C3=O	4.4542
364	Chembl4277205	145984653	C1=CC=C2C(=C1)C(=O)N(C2=O)COC3=C(C=C(C=C3)[N+](=O)[O-])/C=C\4/C(=O)NC(=O)S4	4.29714
365	Chembl4277622	145985850	C1=CC=C2C(=C1)C(=O)N(C2=O)COC3=C(C=C(C=C3)/C=C\4/C(=O)NC(=O)S4)[N+](=O)[O-]	4.6482
366	Chembl4288954	145986556	C1=CC=C2C(=C1)C(=O)N(C2=O)COC3=CC=CC(=C3)/C=C\4/C(=O)NC(=S)S4	4.46878
367	Chembl4291262	145986665	C1=CC=C2C(=C1)C(=O)N(C2=O)COC3=C(C=C(C=C3)/C=C\4/C(=O)NC(=O)S4)Cl	4.67882
368	Chembl4289618	145988648	C1=CC=C2C(=C1)C(=O)N(C2=O)COC3=C(C=C(C=C3)/C=C\4/C(=O)NC(=S)S4)Cl	5.2644
369	Chembl4292355	145989626	C1=CC=C2C(=C1)C(=O)N(C2=O)COC3=CC=C(C=C3)/C=C\4/C(=O)NC(=S)S4	5.10182
370	Chembl4284072	145990339	C1=CC=C2C(=C1)C(=O)N(C2=O)COC3=CC=C(C=C3)/C=C\4/C(=O)NC(=O)S4	4.59176
371	Chembl4287854	145991381	CCOC1=C(C=CC(=C1)/C=C\2/C(=O)NC(=O)S2)OCN3C(=O)C4=CC=CC=C4C3=O	4.53373
372	Chembl4286187	145993316	C1=CC=C2C(=C1)C(=O)N(C2=O)COC3=C(C=C(C=C3)Cl)/C=C\4/C(=O)NC(=S)S4	4.45817
373	Chembl4294091	145993688	C1=CC=C2C(=C1)C(=O)N(C2=O)COC3=C(C=C(C=C3)/C=C\4/C(=O)NC(=S)S4)[N+](=O)[O-]	5.18111
374	Chembl4553154	155510402	C[C@H](CN1C=C(N=N1)C(=O)OC)OC2=C(C=C(C=C2)Br)OC	4.85387
375	Chembl4543253	155510527	CC1=CC=C(C=C1)C2=CSC(=N2)NC(=O)CSC3=NC(=C(N=N3)C4=CC=C(C=C4)Br)C5=CC=C(C=C5)Br	5.55284
376	Chembl4435180	155510903	C1=CC(=CC=C1/C=C\2/C3=C(C=C(C=C3)Cl)NC2=O)C4=NN=C(O4)C5=CC(=CC(=C5)O)O	5.92082
377	Chembl4435225	155511020	COC1=CC(=C(C=C1)NC(=O)CN2C=C(N=N2)COC3=CC(=C4C(=C3)OC5=C(C4=O)C=CC(=C5)Br)O)OC	5.55596
378	Chembl4435963	155511451	C1=CC(=CC=C1C2=CSC(=N2)NC(=O)CSC3=NC(=C(N=N3)C4=CC=C(C=C4)Br)C5=CC=C(C=C5)Br)F	5.55284
379	Chembl4437002	155512130	CC1=CC=C(C=C1)C(C2=CNC3=C2C=C(C=C3)C(=O)NNS(=O)(=O)C4=CC=CC=C4[N+](=O)[O-])C5=CNC6=C5C=C(C=C6)C(=O)NNS(=O)(=O)C7=CC=CC=C7[N+](=O)[O-]	5.67778
380	Chembl4437073	155512321	C1=CC=C2C(=C1)N=NN2C(=O)C3=CC(=C(C=C3)Cl)N	5.36452
381	Chembl4437179	155512324	C1=CC=C2C(=C1)C=C(N2)C(=O)N/N=C/C3=CC(=C(C=C3)Br)F	5.63827
382	Chembl4437052	155512333	C1=CC(=CC(=C1)F)CSC2=NC(=CC(=N2)C3=CC=C(C=C3)Br)C4=CC=C(C=C4)Br	4.72125
383	Chembl4438224	155512866	C1=CC=C2C(=C1)C=C(C(=O)O2)C3=NN(C(=S)O3)C(C4=C(C=C(C=C4)Cl)Cl)NC5=CC=C(C=C5)NC(C6=C(C=C(C=C6)Cl)Cl)N7C(=S)OC(=N7)C8=CC(=O)OC9=CC=CC=C98	7.1549
384	Chembl4438176	155513004	CC1=CC=C(C=C1)C2=CSC(=N2)N=NC3=C(NC4=C3C=C(C=C4)F)O	5.27572
385	Chembl4439490	155513999	C1=CC(=C(C=C1NC(=O)CN2C=C(N=N2)COC3=CC(=C4C(=C3)OC5=C(C4=O)C=CC(=C5)O)O)O)O	5.21254
386	Chembl4439937	155514095	CC1=CC=C(C=C1)C(C2=CNC3=C2C=C(C=C3)C(=O)NNS(=O)(=O)C4=CC=C(C=C4)[N+](=O)[O-])C5=CNC6=C5C=C(C=C6)C(=O)NNS(=O)(=O)C7=CC=C(C=C7)[N+](=O)[O-]	5.67778
387	Chembl4440340	155514524	C1=CC(=CC=C1CN2C=C(N=N2)CSC3=NC4=C(S3)C=CC(=C4)Cl)Cl	4.69897
388	Chembl4440783	155514589	CC1=CC=CC=C1C(=O)N=C2N(C(=CS2)C)C3=CC(=C(C=C3Cl)Cl)Cl	6.82391
389	Chembl4440810	155514778	CC1=C(C2=CC=CC=C2N1)C3=NN=C(O3)C4=CC=C(C=C4)C(C5=CN(C6=CC=CC=C65)C)C7=CN(C8=CC=CC=C87)C	4.69897
390	Chembl4441658	155515326	CC1=CC=CC=C1N\2C(=O)/C(=C/C3=CC=C(C=C3)F)/S/C2=N\NC(=O)C4=CC5=CC=CC=C5OC4=O	7.04576
391	Chembl4442388	155515892	COC1=C(C=C(C=C1)Br)/C=N/C2=NN=C(S2)C3=CC(=CC=C3)[N+](=O)[O-]	5.63827
392	Chembl4442881	155516122	C1=CC=C(C=C1)COC2=C(C=CC(=C2)C3=NN=C(S3)N)Cl	5.63827
393	Chembl4442767	155516250	CC1=CC(=CC=C1)C(=O)N=C2N(C(=CS2)C)C3=CC(=C(C=C3Cl)Cl)Cl	7
394	Chembl4443246	155516355	CC1=CC=C(C=C1)NC(=S)NNC(=O)C2=CC=C(C=C2)C3=NN=C(O3)C4=CC=CC=C4Cl	6.39794
395	Chembl4443277	155516406	CC1=CSC(=NC(=O)C2=CC3=CC=CC=C3OC2=O)N1C4=CC(=C(C=C4Cl)Cl)Cl	7
396	Chembl4443928	155516781	C1=CC(=CC=C1CN2C=C(N=N2)CSC3=NC4=C(S3)C=CC(=C4)Cl)Br	4.69897
397	Chembl4444058	155517195	CC1=CC=C(C=C1)C(C2=CNC3=C2C=C(C=C3)C(=O)NNS(=O)(=O)C4=CC=CC=C4Br)C5=CNC6=C5C=C(C=C6)C(=O)NNS(=O)(=O)C7=CC=CC=C7Br	7
398	Chembl4444856	155517485	CC1=CC=C(C=C1)C(C2=CNC3=C2C=C(C=C3)C(=O)NNS(=O)(=O)C4=C(C=CC(=C4)Cl)Cl)C5=CNC6=C5C=C(C=C6)C(=O)NNS(=O)(=O)C7=C(C=CC(=C7)Cl)Cl	7
399	Chembl4444658	155517504	C1=CC=C2C(=C1)C=C(C(=O)O2)C3=CSC(=N3)C(=O)N/N=C/C4=C(C=CC(=C4)O)O	5.20761
400	Chembl4446128	155518299	COC1=CC=CC=C1NC(=S)NNC(=O)C2=CC=C(C=C2)C3=NN=C(O3)C4=CC=CC=C4Cl	6.39794
401	Chembl4446840	155518413	COC1=CC2=C(C=C1)C(=O)C3=C(C=C(C=C3O2)OCC4=CN(N=N4)CC(=O)NC5=CC(=C(C=C5)OC)OC)O	4.7986
402	Chembl4446848	155518475	CC1=CC(=C2C(=C1)C(=C(N2)O)N=NC3=NC(=CS3)C4=CC=C(C=C4)Br)C	5.27572
403	Chembl4447231	155518958	C1=CC=C2C(=C1)C=C(C(=O)O2)C(=O)N/N=C/C3=CC=CC=N3	5.95861
404	Chembl4448264	155519329	C1=CC=C2C(=C1)C=C(C(=O)O2)C3=NN(C(=S)O3)C(C4=CC(=CC=C4)Br)NC5=CC=C(C=C5)OC6=CC=C(C=C6)NC(C7=CC(=CC=C7)Br)N8C(=S)OC(=N8)C9=CC1=CC=CC=C1OC9=O	7.1549
405	Chembl4447911	155519624	C1=CC=C2C(=C1)C(=CN2)C3=NN=C(O3)C4=CC=C(C=C4)C(C5=CNC6=C5C=C(C=C6)Cl)C7=CNC8=C7C=C(C=C8)Cl	4.69897
406	Chembl4448033	155519901	C1=CC=C2C(=C1)C=C(C(=O)O2)C3=NN(C(=S)O3)C(C4=C(C=C(C=C4)Cl)Cl)NC5=CC=C(C=C5)C6=CC=C(C=C6)NC(C7=C(C=C(C=C7)Cl)Cl)N8C(=S)OC(=N8)C9=CC(=O)OC1=CC=CC=C19	7.1549
407	Chembl4448529	155519963	CC1=CC=C(C=C1)C(NC2=CC=C(C=C2)C3=CC=C(C=C3)NC(C4=CC=C(C=C4)C)N5C(=S)OC(=N5)C6=CC(=O)OC7=CC=CC=C76)N8C(=S)OC(=N8)C9=CC1=CC=CC=C1OC9=O	7.1549
408	Chembl4449167	155520318	C1=CC=C2C(=C1)C=C(C(=O)O2)C3=NN(C(=S)O3)C(C4=CC=C(C=C4)Cl)NC5=CC=C(C=C5)NC(C6=CC=C(C=C6)Cl)N7C(=S)OC(=N7)C8=CC(=O)OC9=CC=CC=C98	7.1549
409	Chembl4449386	155520883	CC1=CC=C(C=C1)C2=CC(=NC(=N2)SCC3=CC=CC=C3Cl)C4=CC(=CC=C4)Br	4.72125
410	Chembl4449655	155520902	CCOC(=O)CN1C(=O)/C(=C\C2=CC=C(C=C2)N3C=CC4=C(C=CN=C43)Br)/SC1=O	6.25964
411	Chembl4449860	155520978	C1=CC=C(C(=C1)C(=O)CN2C3=CC=CC=C3N=N2)O	5.31247
412	Chembl4450153	155521316	CC1=CC=C(C=C1)C(C2=CNC3=C2C=C(C=C3)C(=O)NNS(=O)(=O)C4=CC=CC=C4Cl)C5=CNC6=C5C=C(C=C6)C(=O)NNS(=O)(=O)C7=CC=CC=C7Cl	7
413	Chembl4451108	155521807	C1=CC=C2C(=C1)C=C(C(=O)O2)C3=NN(C(=S)O3)C(C4=CC=C(C=C4)[N+](=O)[O-])NC5=CC=C(C=C5)C6=CC=C(C=C6)NC(C7=CC=C(C=C7)[N+](=O)[O-])N8C(=S)OC(=N8)C9=CC(=O)OC1=CC=CC=C19	7.1549
414	Chembl4450733	155522269	C1=CC=C2C(=C1)C=C(C(=O)O2)C(=O)N/N=C/C3=CC(=CC=C3)F	5.95861
415	Chembl4451317	155522295	C1=CC=C2C(=C1)C(=CN2)C3=NN=C(O3)C4=CC=C(C=C4)C(C5=CNC6=C5C=C(C=C6)C#N)C7=CNC8=C7C=C(C=C8)C#N	4.69897
416	Chembl4450847	155522340	COC1=CC=C(C=C1)CC2=NN=C(N2CC(=O)NNC(=S)NC3=CC=C(C=C3)Cl)C4=CC=C(C=C4)Cl	5.46852
417	Chembl4453617	155522673	CN1C2=CC=CC=C2C(=C1O)N=NC3=NC(=CS3)C4=CC=C(C=C4)F	5.27572
418	Chembl4453256	155522925	COC1=CC=C(C=C1)C2=CSC(=N2)NC(=O)CSC3=NC(=C(N=N3)C4=CC=C(C=C4)Br)C5=CC=C(C=C5)Br	5.55284
419	Chembl4453742	155523305	C1=CC=C2C(=C1)C=C(C(=O)O2)C3=NN(C(=S)O3)C(C4=C(C=C(C=C4)Cl)Cl)NC5=CC=C(C=C5)OC6=CC=C(C=C6)NC(C7=C(C=C(C=C7)Cl)Cl)N8C(=S)OC(=N8)C9=CC1=CC=CC=C1OC9=O	7.1549
420	Chembl4454919	155524062	CC(=O)OC1=CC(=CC2=C1C(=O)C3=C(O2)C=C(C=C3)OC)OCC4=CN(N=N4)CC(=O)NC5=C(C=C(C=C5)OC)OC	4.47939
421	Chembl4453842	155524159	CC(=O)OC1=CC(=CC2=C1C(=O)C3=C(O2)C=C(C=C3)OC)OCC4=CN(N=N4)CC(=O)NC5=CC(=C(C=C5)OC)OC	4.00599
422	Chembl4454670	155524260	CC1=C(C2=CC=CC=C2N1)C3=NN=C(O3)C4=CC=C(C=C4)C(C5=CNC6=C5C=C(C=C6)Br)C7=CNC8=C7C=C(C=C8)Br	4.69897
423	Chembl4454092	155524303	C1=CC(=CC=C1CSC2=NC(=CC(=N2)C3=CC=C(C=C3)Br)C4=CC=C(C=C4)Br)F	4.72125
424	Chembl4456568	155524371	CC1=CSC(=NC(=O)C2=CC=CC3=CC=CC=C32)N1C4=CC(=C(C=C4Cl)Cl)Cl	6.82391
425	Chembl4456031	155524800	COC1=C(C=C(C=C1)NC(=O)CN2C=C(N=N2)COC3=CC(=C4C(=C3)OC5=C(C4=O)C=C(C=C5)Br)O)OC	4.5252
426	Chembl4457539	155525398	COC1=CC=C(C=C1)N\2C(=O)/C(=C/C3=CC=C(C=C3)F)/S/C2=N\NC(=O)C4=CC5=CC=CC=C5OC4=O	7.04576
427	Chembl4457153	155525485	C1=CC=C(C(=C1)CN2C=C(N=N2)CSC3=NC4=CC=CC=C4S3)Br	4.69897
428	Chembl4457996	155525755	CC1=CSC(=NC(=O)C2=CC=C(C=C2)OC)N1C3=CC(=C(C=C3Cl)Cl)Cl	7
429	Chembl4456879	155525777	C1=CC(=CC=C1/C=C/2\C(=O)NC(=O)S2)N3C=C(C=N3)[N+](=O)[O-]	6.25964
430	Chembl4457442	155526039	C1=CC2=C(C=C1Cl)N=C(S2)SCC3=CN(N=N3)CC4=CC(=CC(=C4)Cl)Cl	4.69897
431	Chembl4459113	155526708	C1=CC=C2C(=C1)C=C(C(=O)O2)C3=NN(C(=S)O3)C(C4=CC(=CC=C4)Br)NC5=CC=C(C=C5)NC(C6=CC(=CC=C6)Br)N7C(=S)OC(=N7)C8=CC(=O)OC9=CC=CC=C98	7.1549
432	Chembl4458326	155526927	C1=CC=C2C(=C1)N=C(S2)SCC3=CN(N=N3)CC4=CC=C(C=C4)Br	4.69897
433	Chembl4458336	155526933	C1=CC=C(C=C1)C2=CSC(=N2)NC(=O)CSC3=NC(=C(N=N3)C4=CC=C(C=C4)F)C5=CC=C(C=C5)F	5.55284
434	Chembl4458754	155527075	C1=CC=C2C(=C1)C(=C(C(=O)O2)C(C3=CC(=CC=C3)Cl)C4=C(C5=CC=CC=C5OC4=O)N)N	4.69897
435	Chembl4458477	155527124	CC(C)C[C@@H](C(=O)N[C@@H](CCSC)C(=O)O)NC(=O)[C@H](CO)NC(=O)[C@@H]1CCCN1C(=O)[C@H](C(C)C)NC(=O)[C@H](CCCN=C(N)N)N	4.63695
436	Chembl4458760	155527135	CC1=CC=C(C=C1)C2=CC(=NC(=N2)SCC3=CC=C(C=C3)F)C4=CC(=CC=C4)Br	4.72125
437	Chembl4459920	155527576	CC1=CC=C(C=C1)C(C2=CNC3=C2C=C(C=C3)C(=O)NNS(=O)(=O)C4=CC=C(C=C4)C)C5=CNC6=C5C=C(C=C6)C(=O)NNS(=O)(=O)C7=CC=C(C=C7)C	7
438	Chembl4460050	155527615	C1=CC(=CC=C1C2=CSC(=N2)NC(=O)CSC3=NC(=C(N=N3)C4=CC=C(C=C4)F)C5=CC=C(C=C5)F)F	5.55284
439	Chembl4460633	155527901	C1=CC=C(C=C1)C2=C(N(C(=N2)C3=C(NC4=CC=CC=C43)C5=CC(=CC=C5)Cl)C6=CC=CC=C6)C7=CC=CC=C7	5.08092
440	Chembl4460212	155527937	C1=CC(=CC=C1CSC2=NC(=CC(=N2)C3=CC=C(C=C3)Br)C4=CC=C(C=C4)Br)Cl	4.72125
441	Chembl4460518	155527969	CC1=CC2=C(C=C1)N(C(=C2N=NC3=NC(=CS3)C4=CC=C(C=C4)O)O)CC5=CC=CC=C5F	5.27572
442	Chembl4460255	155528082	CC1=CC=C(C=C1)C(C2=CNC3=C2C=C(C=C3)C(=O)NNS(=O)(=O)C4=CC=CC(=C4)[N+](=O)[O-])C5=CNC6=C5C=C(C=C6)C(=O)NNS(=O)(=O)C7=CC=CC(=C7)[N+](=O)[O-]	5.67778
443	Chembl4461266	155528290	C1=CC(=CC=C1C2=CSC(=N2)N=NC3=C(NC4=C3C=C(C=C4)F)O)F	5.27572
444	Chembl4461307	155528293	C1=CC=C2C(=C1)C=C(C(=O)O2)C(=O)N/N=C/C3=CC=CC=C3F	5.95861
445	Chembl4461186	155528487	C1=CC=C(C=C1)COC2=CC=C(C=C2)/C=N/C3=NN=C(S3)C4=CC=C(C=C4)Cl	5.63827
446	Chembl4461594	155528555	CCOC(=O)C1=C(C[C@H](N([C@@H]1C2=CC=C(C=C2)C)C3=CC(=CC=C3)[N+](=O)[O-])C4=CC=C(C=C4)C)NC5=CC(=CC=C5)[N+](=O)[O-]	5.63827
447	Chembl4461780	155528794	C1=CC=C2C(=C1)C=C(C(=O)O2)C3=NN(C(=S)O3)C(C4=CC(=CC=C4)Cl)NC5=CC=C(C=C5)C6=CC=C(C=C6)NC(C7=CC(=CC=C7)Cl)N8C(=S)OC(=N8)C9=CC(=O)OC1=CC=CC=C19	7.1549
448	Chembl4461882	155529010	COC1=CC=CC(=C1)C(NC2=CC=C(C=C2)C3=CC=C(C=C3)NC(C4=CC(=CC=C4)OC)N5C(=S)OC(=N5)C6=CC(=O)OC7=CC=CC=C76)N8C(=S)OC(=N8)C9=CC1=CC=CC=C1OC9=O	7.1549
449	Chembl4462160	155529019	COC1=C(C(=CC(=C1)C(C2=C(C3=CC=CC=C3OC2=O)N)C4=C(C5=CC=CC=C5OC4=O)N)Br)O	4.69897
450	Chembl4462234	155529045	C1=CC=C(C(=C1)CN2C=C(N=N2)CSC3=NC4=C(S3)C=CC(=C4)Cl)F	4.69897
451	Chembl4463405	155529760	C1=CC=C2C(=C1)N=C(S2)SCC3=CN(N=N3)CC4=CC(=CC=C4)F	4.69897
452	Chembl4462975	155529801	CC1=CC(=CC=C1)NC(=S)NNC(=O)C2=CC=C(C=C2)C3=NN=C(O3)C4=CC=CC=C4Cl	6.39794
453	Chembl4463785	155530029	COC1=CC=CC=C1N\2C(=O)/C(=C/C3=CC=C(C=C3)F)/S/C2=N\NC(=O)C4=CC5=CC=CC=C5OC4=O	7.04576
454	Chembl4464119	155530094	C1=CC=C2C(=C1)C=C(C(=O)O2)C3=NN(C(=S)O3)C(C4=CC=C(C=C4)Cl)NC5=CC=C(C=C5)OC6=CC=C(C=C6)NC(C7=CC=C(C=C7)Cl)N8C(=S)OC(=N8)C9=CC1=CC=CC=C1OC9=O	7.1549
455	Chembl4464685	155530344	C1=CC=C(C(=C1)C2=NN=C(O2)C3=CC=C(C=C3)C(=O)NNC(=S)NC4=CC=C(C=C4)[N+](=O)[O-])Cl	6.39794
456	Chembl4464398	155530455	CC(=C)C(COC1=C2C(=CC3=C1OC=C3)C=CC(=O)O2)OC(C)(C)[C@@H](COC4=C5C=CC(=O)OC5=CC6=C4C=CO6)O	5.05552
457	Chembl4465117	155530855	CC1=CC=C(C=C1)C(C2=CNC3=C2C=C(C=C3)C(=O)NNS(=O)(=O)C4=CC(=C(C=C4)Cl)Cl)C5=CNC6=C5C=C(C=C6)C(=O)NNS(=O)(=O)C7=CC(=C(C=C7)Cl)Cl	7
458	Chembl4465548	155531052	CC1=CC2=C(C=C1)N(C(=C2N=NC3=NC(=CS3)C4=CC=C(C=C4)OC)O)CC5=CC=CC=C5F	5.27572
459	Chembl4465477	155531297	C1=CC=C(C=C1)C2=C(C3=C(N2)C=CC(=C3)F)C4=NC(=C(N4C5=CC=CC=C5)C6=CC=CC=C6)C7=CC=CC=C7	5.08092
460	Chembl4465310	155531323	CC1=NC=CN1C2=CC=C(C=C2)/C=C/3\C(=O)NC(=O)S3	6.25964
461	Chembl4465339	155531355	C[C@H](CN1C=C(N=N1)C2=CC=C(C=C2)C(F)(F)F)OC3=C(C=C(C=C3)C4=CC=C(C=C4)OC)OC	4.85387
462	Chembl4465720	155531367	C1=CC=C2C(=C1)C(=C(C(=O)O2)C(C3=CC(=CC=C3)F)C4=C(C5=CC=CC=C5OC4=O)N)N	4.69897
463	Chembl4465909	155531645	C1=CC=C(C(=C1)CSC2=NC(=CC(=N2)C3=CC=C(C=C3)Br)C4=CC=C(C=C4)Br)F	4.72125
464	Chembl4466757	155531901	COC1=CC(=C(C=C1)NC(=O)CN2C=C(N=N2)COC3=CC(=C4C(=C3)OC5=C(C4=O)C=C(C=C5)Br)O)OC	5.51286
465	Chembl4466929	155532040	COC1=CC=CC(=C1)NC(=S)NNC(=O)C2=CC=C(C=C2)C3=NN=C(O3)C4=CC=CC=C4Cl	6.39794
466	Chembl4466971	155532338	C1=CC=C2C(=C1)C=C(C(=O)O2)C3=NN(C(=S)O3)C(C4=CC(=CC=C4)Br)NC5=CC=C(C=C5)C6=CC=C(C=C6)NC(C7=CC(=CC=C7)Br)N8C(=S)OC(=N8)C9=CC(=O)OC1=CC=CC=C19	7.1549
467	Chembl4467305	155532615	CN(C)C1=CC=C(C=C1)C(NC2=CC=C(C=C2)C3=CC=C(C=C3)NC(C4=CC=C(C=C4)N(C)C)N5C(=S)OC(=N5)C6=CC(=O)OC7=CC=CC=C76)N8C(=S)OC(=N8)C9=CC1=CC=CC=C1OC9=O	7.1549
468	Chembl4468394	155532972	CC1=CC=C(C=C1)C(C2=CNC3=C2C=C(C=C3)C(=O)NNS(=O)(=O)C4=CC(=CC(=C4)Cl)Cl)C5=CNC6=C5C=C(C=C6)C(=O)NNS(=O)(=O)C7=CC(=CC(=C7)Cl)Cl	7
469	Chembl4468287	155532978	CN1C=C(C2=CC=CC=C21)C3=NN=C(O3)C4=CC=C(C=C4)C(C5=CNC6=C5C=C(C=C6)Br)C7=CNC8=C7C=C(C=C8)Br	4.69897
470	Chembl4468873	155533171	CC1=CC=C(C=C1)C(NC2=CC=C(C=C2)NC(C3=CC=C(C=C3)C)N4C(=S)OC(=N4)C5=CC(=O)OC6=CC=CC=C65)N7C(=S)OC(=N7)C8=CC9=CC=CC=C9OC8=O	7.1549
471	Chembl4468520	155533188	C1=CC=C2C(=C1)C=C(C(=O)O2)C3=NN(C(=S)O3)C(C4=CC=C(C=C4)[N+](=O)[O-])NC5=CC=C(C=C5)OC6=CC=C(C=C6)NC(C7=CC=C(C=C7)[N+](=O)[O-])N8C(=S)OC(=N8)C9=CC1=CC=CC=C1OC9=O	7.1549
472	Chembl4468486	155533261	CC1=CC(=C2C(=C1)C(=C(N2)O)N=NC3=NC(=CS3)C4=CC=C(C=C4)F)C	5.27572
473	Chembl4468782	155533288	C1=CC=C2C(=C1)C(=CN2)C3=NN=C(O3)C4=CC=C(C=C4)C(C5=CNC6=CC=CC=C65)C7=CNC8=CC=CC=C87	4.69897
474	Chembl4469426	155533632	COC1=CC=CC(=C1)N\2C(=O)/C(=C/C3=CC=C(C=C3)F)/S/C2=N\NC(=O)C4=CC5=CC=CC=C5OC4=O	7.04576
475	Chembl4469544	155533650	COC1=C(C=C(C=C1)Br)/C=N/C2=NN=C(S2)C3=CC=C(C=C3)Cl	5.63827
476	Chembl4469294	155533786	C1=CC(=CC(=C1)Cl)C(=O)N2C3=CC(=C(C=C3N=N2)Cl)Cl	5.52288
477	Chembl4469167	155533843	C1=CC=C(C=C1)C2=C(N=NC(=N2)SCC(=O)NC3=NC(=CS3)C4=CC=C(C=C4)Br)C5=CC=CC=C5	5.55284
478	Chembl4471224	155534877	CC(=O)OC1=CC(=CC2=C1C(=O)C3=C(O2)C=CC(=C3)Br)OCC4=CN(N=N4)CC(=O)NC5=C(C=C(C=C5)OC)OC	4.91614
479	Chembl4470944	155534978	C1=CC=C2C(=C1)C(=C(C(=O)O2)C(C3=CC=CC=C3Cl)C4=C(C5=CC=CC=C5OC4=O)N)N	4.69897
480	Chembl4471582	155535264	C1=CC=C2C=C(C(=CC2=C1)C3=NN=C(S3)N)O	5.63827
481	Chembl4472506	155535412	C1=CC=C(C=C1)C(=O)C[C@@H](C2=CC(=CC=C2)Br)C3=CNC4=CC=CC=C43	5.36653
482	Chembl4471901	155535503	C1=CC=C(C(=C1)/C=N/C2=NN=C(S2)C3=CC=C(C=C3)Cl)[N+](=O)[O-]	5.63827
483	Chembl4472054	155535751	CN1C=C(C2=CC=CC=C21)C3=NN=C(O3)C4=CC=C(C=C4)C(C5=CNC6=C5C=C(C=C6)Cl)C7=CNC8=C7C=C(C=C8)Cl	4.69897
484	Chembl4472850	155535829	CC1=CC2=C(C=C1C)N(N=N2)CC(=O)C3=CC(=C(C=C3)Cl)Cl	5.69037
485	Chembl4472998	155536131	C1=CC(=C(C=C1NC(=O)CN2C=C(N=N2)COC3=CC(=C4C(=C3)OC5=C(C4=O)C=CC(=C5)Br)O)O)O	5.2815
486	Chembl4473217	155536491	C1=CC=C(C(=C1)CN2C=C(N=N2)CSC3=NC4=C(S3)C=CC(=C4)Cl)Br	4.69897
487	Chembl4473640	155536535	CN1C=C(C2=CC=CC=C21)C3=NN=C(O3)C4=CC=C(C=C4)C(C5=CNC6=C5C=C(C=C6)Cl)C7=CNC8=CC=CC=C87	5.69897
488	Chembl4473758	155536538	CC1=CC=C(C=C1)C2=CC(=C(C=C2)O[C@H](C)CN3C=C(N=N3)C4=CC=C(C=C4)C(F)(F)F)OC	4.85387
489	Chembl4473968	155536686	CC1=CC=CC=C1/C=N/NC(=O)C2=CC3=CC=CC=C3OC2=O	5.95861
490	Chembl4474751	155537150	C1=CC(=C(C=C1NC(=O)CN2C=C(N=N2)COC3=CC(=C4C(=C3)OC5=C(C4=O)C=C(C=C5)O)O)O)O	5.1512
491	Chembl4474603	155537256	CC1=CC(=CC=C1)[C@H](CC(=O)C2=CC=CC=C2)C3=CNC4=CC=CC=C43	5.36653
492	Chembl4474453	155537292	COC1=CC(=C(C=C1)O)/C=N/NC(=O)C2=CC3=CC=CC=C3OC2=O	5.95861
493	Chembl4475313	155537378	C1=CC=C2C(=C1)C=C(C(=O)O2)C(=O)N/N=C\3/N(C(=O)/C(=C/C4=CC=C(C=C4)F)/S3)C5=CC=CC=C5Cl	7.04576
494	Chembl4475117	155537531	CC1=C(C2=CC=CC=C2N1)C3=NN=C(O3)C4=CC=C(C=C4)C(C5=CNC6=C5C=C(C=C6)Cl)C7=CNC8=C7C=C(C=C8)Cl	4.69897
495	Chembl4475743	155537893	C1=CC=C2C(=C1)N=C(S2)SCC3=CN(N=N3)CC4=CC(=CC(=C4)Cl)Cl	4.69897
496	Chembl4475749	155537956	COC1=CC(=C(C=C1)/C=N/NC(=O)C2=CC3=CC=CC=C3OC2=O)O	5.95861
497	Chembl4475632	155538044	CN1C=C(C2=CC=CC=C21)C3=NN=C(O3)C4=CC=C(C=C4)C(C5=CNC6=C5C=C(C=C6)C#N)C7=CNC8=C7C=C(C=C8)C#N	4.69897
498	Chembl4476028	155538053	CC1=CSC(=NC(=O)C2=CC=CO2)N1C3=CC(=C(C=C3Cl)Cl)Cl	7
499	Chembl4476560	155538463	CC(=O)OC1=CC(=CC2=C1C(=O)C3=C(O2)C=C(C=C3)Br)OCC4=CN(N=N4)CC(=O)NC5=CC(=C(C=C5)OC)OC	4.58319
500	Chembl4476702	155538670	C1=CC(=CC=C1C2=NN=C(S2)/N=C/C3=C(C=C(C=C3)Cl)Cl)Cl	5.63827
501	Chembl4525043	155538745	CC1=CC=C(C=C1)C2=CSC(=N2)N=NC3=C(N(C4=CC=CC=C43)C)O	5.27572
502	Chembl4513279	155538933	CN1C2=CC=CC=C2C(=C1O)N=NC3=NC(=CS3)C4=CC=C(C=C4)OC	5.27572
503	Chembl4513326	155538960	COC1=CC=CC(=C1)C(NC2=CC=C(C=C2)NC(C3=CC(=CC=C3)OC)N4C(=S)OC(=N4)C5=CC(=O)OC6=CC=CC=C65)N7C(=S)OC(=N7)C8=CC9=CC=CC=C9OC8=O	7.1549
504	Chembl4483090	155539790	C1=CC=C(C=C1)C2=C(C3=CC=CC=C3N2)C(C4=CC=C(C=C4)C5=NN=C(O5)C6=CNC7=CC=CC=C76)C8=C(NC9=CC=CC=C98)C1=CC=CC=C1	4.69897
505	Chembl4515488	155539994	CC(=O)OC1=CC(=CC2=C1C(=O)C3=C(O2)C=C(C=C3)Br)OCC4=CN(N=N4)CC(=O)NC5=C(C=C(C=C5)OC)OC	4.89347
506	Chembl4516633	155540166	C1=CC=C2C(=C1)N=NN2CC(=O)C3=C(C(=CC=C3)Cl)Cl	5.45967
507	Chembl4516653	155540302	CCOC(=O)C1=C(C[C@H](N([C@@H]1C2=CC=C(C=C2)Cl)C3=CC(=CC=C3)F)C4=CC=C(C=C4)Cl)NC5=CC(=CC=C5)F	5.63827
508	Chembl4483439	155540379	C1=CC=C(C=C1)CN2C=C(N=N2)CSC3=NC4=C(S3)C=CC(=C4)Cl	4.69897
509	Chembl4516968	155540420	C1=CC=C2C(=C1)C=C(C(=O)O2)C(=O)N/N=C\3/N(C(=O)/C(=C/C4=CC=C(C=C4)F)/S3)C5=CC=C(C=C5)Cl	7.04576
510	Chembl4519690	155541736	CC1=CC=C(C=C1)C(C2=CNC3=C2C=C(C=C3)C(=O)NNS(=O)(=O)C4=C(C=C(C=C4)[N+](=O)[O-])[N+](=O)[O-])C5=CNC6=C5C=C(C=C6)C(=O)NNS(=O)(=O)C7=C(C=C(C=C7)[N+](=O)[O-])[N+](=O)[O-]	6.30103
511	Chembl4519790	155542053	COC1=CC2=C(C=C1)OC3=CC(=CC(=C3C2=O)O)OCC4=CN(N=N4)CC(=O)NC5=C(C=C(C=C5)OC)OC	5.0804
512	Chembl4520965	155542409	C1=CC=C(C=C1)C(=O)C[C@@H](C2=CC(=CC=C2)[N+](=O)[O-])C3=CNC4=CC=CC=C43	5.36653
513	Chembl4521001	155542582	C1=CC(=CC=C1/C=C/2\C(=O)N(C(=O)S2)CC(=O)O)N3C=CC4=C(C=CN=C43)Br	6.25964
514	Chembl4521652	155542676	CC1=CC(=CC=C1)C(C2=C(C3=CC=CC=C3OC2=O)N)C4=C(C5=CC=CC=C5OC4=O)N	4.69897
515	Chembl4521721	155542741	COC1=C(C(=CC(=C1)C(C2=C(C3=CC=CC=C3OC2=O)N)C4=C(C5=CC=CC=C5OC4=O)N)Cl)O	4.69897
516	Chembl4526013	155543251	COC1=CC=C(C=C1)NC(=S)NNC(=O)C2=CC=C(C=C2)C3=NN=C(O3)C4=CC=CC=C4Cl	6.39794
517	Chembl4549579	155543477	CC1=CC=C(C=C1)C2=CSC(=N2)N=NC3=C(N(C4=C3C=C(C=C4)C)CC5=CC=CC=C5F)O	5.27572
518	Chembl4526260	155544036	C[C@H](CN1C=C(N=N1)C2=CC=C(C=C2)C(F)(F)F)OC3=C(C=C(C=C3)C4=CC=C(C=C4)[N+](=O)[O-])OC	4.85387
519	Chembl4526264	155544045	C1=CC=C(C(=C1)CN2C=C(N=N2)CSC3=NC4=C(S3)C=CC(=C4)Cl)Cl	4.69897
520	Chembl4527538	155544268	CC1=CC=C(C=C1)C2=CC(=NC(=N2)SCC3=CC=CC=C3Br)C4=CC=C(C=C4)Br	4.72125
521	Chembl4526576	155544539	CC1=CC=C(C=C1)C(C2=CNC3=C2C=C(C=C3)C(=O)NNS(=O)(=O)C4=C(C=C(C=C4)Cl)Cl)C5=CNC6=C5C=C(C=C6)C(=O)NNS(=O)(=O)C7=C(C=C(C=C7)Cl)Cl	7
522	Chembl4526585	155544641	C1=CC=C(C=C1)C(=O)C[C@H](C2=CNC3=CC=CC=C32)C4=C(C=CC=C4Cl)Cl	5.36653
523	Chembl4565442	155544678	CC1=CC=C(C=C1)C(C2=CNC3=C2C=C(C=C3)C(=O)NNS(=O)(=O)C4=CC(=C(C=C4Cl)Cl)Cl)C5=CNC6=C5C=C(C=C6)C(=O)NNS(=O)(=O)C7=CC(=C(C=C7Cl)Cl)Cl	6.52288
524	Chembl4529174	155545216	COC1=CC2=C(C=C1)C(=O)C3=C(C=C(C=C3O2)OCC4=CN(N=N4)CC(=O)NC5=C(C=C(C=C5)OC)OC)O	5.68613
525	Chembl4565828	155545371	C1=CC(=CC=C1C2=C(N=NC(=N2)SCC(=O)NC3=NC(=CS3)C4=CC=C(C=C4)Cl)C5=CC=C(C=C5)F)F	5.55284
526	Chembl4529524	155545574	CC(=O)OC1=CC(=CC2=C1C(=O)C3=C(O2)C=CC(=C3)OC)OCC4=CN(N=N4)CC(=O)NC5=C(C=C(C=C5)OC)OC	4.37059
527	Chembl4532196	155546295	C1=CC=C2C(=C1)C=C(C(=O)O2)C(=O)N/N=C/C3=C(C(=CC=C3)O)O	5.95861
528	Chembl4531602	155546457	CC(=O)NC1=CC=C(C=C1)N2C(=C(N=C2C3=C(NC4=C3C=C(C=C4)F)C5=CC=CC=C5)C6=CC=CC=C6)C7=CC=CC=C7	5.08092
529	Chembl4531736	155546505	CC1=C(C=C(C=C1)N\2C(=O)/C(=C/C3=CC=C(C=C3)F)/S/C2=N\NC(=O)C4=CC5=CC=CC=C5OC4=O)C	7.04576
530	Chembl4532383	155546673	CCOC(=O)C1=C(C[C@H](N([C@@H]1C2=CC=C(C=C2)Cl)C3=CC(=CC=C3)Cl)C4=CC=C(C=C4)Cl)NC5=CC(=CC=C5)Cl	5.63827
531	Chembl4533762	155547288	CN(C)C1=CC=C(C=C1)C(NC2=CC=C(C=C2)NC(C3=CC=C(C=C3)N(C)C)N4C(=S)OC(=N4)C5=CC(=O)OC6=CC=CC=C65)N7C(=S)OC(=N7)C8=CC9=CC=CC=C9OC8=O	7.1549
532	Chembl4532649	155547853	C1=CC=C2C(=C1)N=NN2C(=O)C3=C(C(=C(C=C3)F)F)Cl	5.24949
533	Chembl4535608	155547925	C1=CC=C2C(=C1)C=C(C(=O)O2)C3=NN(C(=S)O3)C(C4=CC(=CC=C4)Cl)NC5=CC=C(C=C5)NC(C6=CC(=CC=C6)Cl)N7C(=S)OC(=N7)C8=CC(=O)OC9=CC=CC=C98	7.1549
534	Chembl4535006	155548029	CC1=CC=C(C=C1)C(C2=CNC3=C2C=C(C=C3)C(=O)NNS(=O)(=O)C4=CC=C(C=C4)Br)C5=CNC6=C5C=C(C=C6)C(=O)NNS(=O)(=O)C7=CC=C(C=C7)Br	7
535	Chembl4537425	155548091	CC(=C)C(COC1=C2C(=C(C3=C1OC(=O)C=C3)OC)C=CO2)OC(C)(C)[C@@H](COC4=C5C=CC(=O)OC5=CC6=C4C=CO6)O	5.05552
536	Chembl4549137	155548830	C1=CC=C2C(=C1)C=C(C(=O)O2)C3=NN(C(=S)O3)C(C4=CC=C(C=C4)Br)NC5=CC=C(C=C5)OC6=CC=C(C=C6)NC(C7=CC=C(C=C7)Br)N8C(=S)OC(=N8)C9=CC1=CC=CC=C1OC9=O	7.1549
537	Chembl4538427	155549036	C1=CC=C2C(=C1)C=C(C(=O)O2)C3=NN(C(=S)O3)C(C4=CC=C(C=C4)F)NC5=CC=C(C=C5)NC(C6=CC=C(C=C6)F)N7C(=S)OC(=N7)C8=CC(=O)OC9=CC=CC=C98	7.1549
538	Chembl4549180	155549196	CN(C)C1=CC=C(C=C1)C(NC2=CC=C(C=C2)OC3=CC=C(C=C3)NC(C4=CC=C(C=C4)N(C)C)N5C(=S)OC(=N5)C6=CC7=CC=CC=C7OC6=O)N8C(=S)OC(=N8)C9=CC1=CC=CC=C1OC9=O	7.1549
539	Chembl4538319	155549256	CC1=CC=C(C=C1)C2=CSC(=N2)N=NC3=C(NC4=C(C=C(C=C43)C)C)O	5.27572
540	Chembl4538081	155549339	C1=CC(=C(C=C1O)O)NC(=O)CN2C=C(N=N2)COC3=CC(=C4C(=C3)OC5=C(C4=O)C=C(C=C5)O)O	4.80632
541	Chembl4539474	155549603	CC1=CC=C(C=C1)C2=CC(=NC(=N2)SCC3=CC=C(C=C3)Cl)C4=CC=C(C=C4)Br	4.72125
542	Chembl4539984	155549930	C1=CC=C2C=C(C=CC2=C1)C(=O)C[C@@H](C3=CC=CS3)C4=CNC5=CC=CC=C54	5.36653
543	Chembl4549286	155550722	C1=CC(=CC=C1/C=C/2\C(=O)NC(=O)S2)N3C=CC4=C(C=CN=C43)NC5=CC=C(C=C5)F	6.25964
544	Chembl4569072	155550923	C1=CC=C2C(=C1)C(=C(C(=O)O2)C(C3=CC(=CC=C3)Br)C4=C(C5=CC=CC=C5OC4=O)N)N	4.69897
545	Chembl4541097	155551194	CC1=C(C2=CC=CC=C2N1C)C(C3=CC=C(C=C3)C4=NN=C(O4)C5=CNC6=CC=CC=C65)C7=C(N(C8=CC=CC=C87)C)C	4.69897
546	Chembl4541639	155551356	C1=CC=C(C(=C1)NC2=C3C=CN(C3=NC=C2)C4=CC=C(C=C4)/C=C/5\C(=O)NC(=O)S5)OC(F)(F)F	6.25964
547	Chembl4569769	155551754	CC1=C(C2=CC=CC=C2N1)C3=NN=C(O3)C4=CC=C(C=C4)C(C5=CNC6=C5C=C(C=C6)C#N)C7=CNC8=C7C=C(C=C8)C#N	4.69897
548	Chembl4543092	155551811	C1=CC=C(C(=C1)C2=NN=C(O2)C3=CC=C(C=C3)C(=O)NNC(=S)NC4=CC=CC=C4Br)Cl	6.39794
549	Chembl4576254	155551838	CC(=C)C(COC1=C2C=CC(=O)OC2=CC3=C1C=CO3)OC(C)(C)C(COC4=C5C(=C(C6=C4OC(=O)C=C6)OC)C=CO5)O	5.05552
550	Chembl4543995	155552138	C[C@H](CN1C=C(N=N1)C2=CC=C(C=C2)C(F)(F)F)OC3=C(C=C(C=C3)C4=CC=C(C=C4)F)OC	4.85387
551	Chembl4547068	155552221	C1=CC=C(C=C1)NN2C(=CSC2=NC3=CC=C(C=C3)Cl)C4=CC=C(C=C4)Cl	5.01773
552	Chembl4547082	155552278	CC(C)(C)C1=CC=C(C=C1)CN2C=C(N=N2)CSC3=NC4=CC=CC=C4S3	4.69897
553	Chembl4544255	155552319	CN1C=C(C2=CC=CC=C21)C3=NN=C(O3)C4=CC=C(C=C4)C(C5=C(NC6=CC=CC=C65)C7=CC=CC=C7)C8=C(NC9=CC=CC=C98)C1=CC=CC=C1	4.69897
554	Chembl4543754	155552510	CC1=CSC(=NC(=O)C2=CC=CC=C2Cl)N1C3=CC(=C(C=C3Cl)Cl)Cl	7
555	Chembl4547036	155552582	C1=CC=C(C(=C1)C2=NN=C(O2)C3=CC=C(C=C3)C(=O)NNC(=S)NC4=CC(=C(C=C4)Cl)Cl)Cl	6.39794
556	Chembl4544064	155552633	C1=CC=C2C(=C1)C=NN2C3=CC=C(C=C3)/C=C/4\C(=O)NC(=O)S4	6.25964
557	Chembl4545537	155552870	C1=CC=C2C(=C1)C=C(C(=O)O2)C(=O)N/N=C/C3=CC=C(C=C3)F	5.95861
558	Chembl4545190	155552897	CC1=CC=C(C=C1)C2=CSC(=N2)NC(=O)CSC3=NC(=C(N=N3)C4=CC=C(C=C4)F)C5=CC=C(C=C5)F	5.55284
559	Chembl4545401	155552997	C1=CC(=CC=C1C2=CSC(=N2)NC(=O)CSC3=NC(=C(N=N3)C4=CC=C(C=C4)Br)C5=CC=C(C=C5)Br)Br	5.55284
560	Chembl4545231	155553123	C1=CC(=CC=C1C2=C(N=NC(=N2)SCC(=O)NC3=NC(=CS3)C4=CC=C(C=C4)Br)C5=CC=C(C=C5)F)F	5.55284
561	Chembl4545982	155553329	C1=CC(=CC(=C1)F)CSC2=NC(=CC(=N2)C3=CC(=CC=C3)Br)C4=CC=C(C=C4)Br	4.72125
562	Chembl4545784	155553432	CC1=CC2=C(C=C1)NC(=C2N=NC3=NC(=CS3)C4=CC=C(C=C4)O)O	5.27572
563	Chembl4576623	155553806	COC1=CC=C(C=C1)N2C(=C(N=C2C3=C(NC4=CC=CC=C43)C5=CC(=CC=C5)Br)C6=CC=CC=C6)C7=CC=CC=C7	5.08092
564	Chembl4547928	155554008	CC1=CC=C(C=C1)C(NC2=CC=C(C=C2)OC3=CC=C(C=C3)NC(C4=CC=C(C=C4)C)N5C(=S)OC(=N5)C6=CC7=CC=CC=C7OC6=O)N8C(=S)OC(=N8)C9=CC1=CC=CC=C1OC9=O	7.1549
565	Chembl4557896	155554549	C1=CC=C(C=C1)C(=O)C[C@@H](C2=CC=C(C=C2)Br)C3=CNC4=CC=CC=C43	5.36653
566	Chembl4557506	155554792	CC1=C(C(=CC=C1)C)N\2C(=O)/C(=C/C3=CC=C(C=C3)F)/S/C2=N\NC(=O)C4=CC5=CC=CC=C5OC4=O	7.04576
567	Chembl4550316	155554991	C1=CC(=CC=C1C2=CSC(=N2)N=NC3=C(NC4=C3C=C(C=C4)Cl)O)Br	5.27572
568	Chembl4550413	155555150	C1=CC=C(C(=C1)C2=NN=C(O2)C3=CC=C(C=C3)C(=O)NNC(=S)NC4=CC=C(C=C4)Cl)Cl	6.39794
569	Chembl4551286	155555166	C1=CC=C(C=C1)C2=C(N(C(=N2)C3=C(NC4=CC=CC=C43)C5=CC(=CC=C5)Br)C6=CC=C(C=C6)Br)C7=CC=CC=C7	5.08092
570	Chembl4551296	155555225	C1=CC=C2C(=C1)N=C(S2)SCC3=CN(N=N3)CC4=CC=C(C=C4)Cl	4.69897
571	Chembl4553428	155555379	C1=CC=C(C(=C1)C2=NN=C(O2)C3=CC=C(C=C3)C(=O)NNC(=S)NC4=CC(=CC=C4)F)Cl	6.39794
572	Chembl4552230	155555472	C1=CC=C2C(=C1)C=C(C(=O)O2)C3=NN(C(=S)O3)C(C4=CC=C(C=C4)Br)NC5=CC=C(C=C5)C6=CC=C(C=C6)NC(C7=CC=C(C=C7)Br)N8C(=S)OC(=N8)C9=CC(=O)OC1=CC=CC=C19	7.1549
573	Chembl4551617	155555653	C1=CC=C2C(=C1)C=C(C(=O)O2)C3=NN(C(=S)O3)C(C4=CC=C(C=C4)[N+](=O)[O-])NC5=CC=C(C=C5)NC(C6=CC=C(C=C6)[N+](=O)[O-])N7C(=S)OC(=N7)C8=CC(=O)OC9=CC=CC=C98	7.1549
574	Chembl4551747	155555852	CC(C)(C)C1=CC=C(C=C1)CN2C=C(N=N2)CSC3=NC4=C(S3)C=CC(=C4)Cl	4.69897
575	Chembl4554161	155555930	CN1C=C(C2=CC=CC=C21)C3=NN=C(O3)C4=CC=C(C=C4)C(C5=CNC6=CC=CC=C65)C7=CNC8=CC=CC=C87	4.69897
576	Chembl4554505	155556035	C[C@H](CN1C=C(N=N1)C2=CC=C(C=C2)F)OC3=C(C=C(C=C3)Br)OC	4.85387
577	Chembl4554853	155556297	C1=CC=C(C(=C1)C2=NN=C(O2)C3=CC=C(C=C3)C(=O)NNC(=S)NC4=CC=CC=C4Cl)Cl	6.1549
578	Chembl4554478	155556557	C1=CC=C(C(=C1)C2=NN=C(O2)C3=CC=C(C=C3)C(=O)NNC(=S)NC4=CC(=CC=C4)[N+](=O)[O-])Cl	6.39794
579	Chembl4555132	155556585	CC1=C(C2=CC=CC=C2N1)C3=NN=C(O3)C4=CC=C(C=C4)C(C5=C(NC6=CC=CC=C65)C7=CC=CC=C7)C8=C(NC9=CC=CC=C98)C1=CC=CC=C1	4.69897
580	Chembl4554612	155556628	C1=CC(=CC(=C1)[N+](=O)[O-])C2=NN=C(S2)/N=C/C3=C(C=C(C=C3)Cl)Cl	5.63827
581	Chembl4556170	155557040	C1=CC=C(C=C1)C(=O)C[C@@H](C2=C(C=C(C=C2)Cl)Cl)C3=CNC4=CC=CC=C43	5.36653
582	Chembl4555448	155557333	C1=CC=C(C(=C1)C2=NN=C(O2)C3=CC=C(C=C3)C(=O)NNC(=S)NC4=CC=C(C=C4)Br)Cl	6.39794
583	Chembl4559187	155557845	CN1CCN(CC1)CN2C(=S)OC(=N2)CN3C(=NN=C3C4=CC=C(C=C4)Cl)CC5=CC=C(C=C5)OC	5.36653
584	Chembl4560628	155558468	C1=CC2=C(C=C1O)OC3=CC(=CC(=C3C2=O)O)OCC4=CN(N=N4)CC(=O)NC5=C(C=C(C=C5)O)O	4.75424
585	Chembl4561204	155558478	CC1=CC(=C(C=C1)N\2C(=O)/C(=C/C3=CC=C(C=C3)F)/S/C2=N\NC(=O)C4=CC5=CC=CC=C5OC4=O)C	7.04576
586	Chembl4561697	155559088	CC(=CCC/C(=C/CC/C(=C/CC1=C(C(=CC2=C1C(=O)C3=C(C=C(C=C3O2)O)O)O)O)/C)/C)C	4.11805
587	Chembl4561766	155559089	CC(=O)OC1=CC(=CC2=C1C(=O)C3=C(O2)C=CC(=C3)Br)OCC4=CN(N=N4)CC(=O)NC5=CC(=C(C=C5)OC)OC	4.49039
588	Chembl4564900	155559778	C1=CC(=CC=C1/C=N/C2=NN=C(S2)C3=CC=C(C=C3)Cl)O	5.63827
589	Chembl4564699	155559850	CC(=CCC/C(=C/CC/C(=C/CCC(C)(CCC1=C(C(=CC2=C1C(=O)C3=C(C=C(C=C3O2)O)O)O)O)O)/C)/C)C	4.81248
590	Chembl4567979	155560301	C1=CC(=C(C=C1O)O)NC(=O)CN2C=C(N=N2)COC3=CC(=C4C(=C3)OC5=C(C4=O)C=CC(=C5)Br)O	5.23136
591	Chembl4568178	155560470	CCOC(=O)C1=C(C[C@H](N([C@@H]1C2=CC=C(C=C2)Cl)C3=CC(=CC=C3)Br)C4=CC=C(C=C4)Cl)NC5=CC(=CC=C5)Br	5.63827
592	Chembl4568608	155560581	CC1=CC=C(C=C1)C2=CC(=NC(=N2)SCC3=CC(=CC=C3)F)C4=CC(=CC=C4)Br	4.72125
593	Chembl4566389	155560899	CC1=CC2=C(C=C1C)N(N=N2)CC(=O)C3=CC=C(C=C3)OC	5.58503
594	Chembl4580728	155561331	C1=CC(=C(C=C1NC(=O)CN2C=C(N=N2)COC3=CC(=C4C(=C3)OC5=C(C4=O)C=C(C=C5)Br)O)O)O	5.49894
595	Chembl4580943	155561485	COC1=C(C=C(C=C1)NC(=O)CN2C=C(N=N2)COC3=CC(=C4C(=C3)OC5=C(C4=O)C=CC(=C5)Br)O)OC	4.92738
596	Chembl4581675	155561638	C[C@H](CN1C=C(N=N1)C2=CC=CC=C2)OC3=C(C=C(C=C3)Br)OC	4.85387
597	Chembl4584797	155562117	CC1=C(C2=CC=CC=C2N1C)C(C3=CC=C(C=C3)C4=NN=C(O4)C5=CN(C6=CC=CC=C65)C)C7=C(N(C8=CC=CC=C87)C)C	4.69897
598	Chembl4570923	155562458	C1=CC=C2C(=C1)C(=C(C(=O)O2)C(C3=CC=CC=C3F)C4=C(C5=CC=CC=C5OC4=O)N)N	4.69897
599	Chembl4570383	155562954	COC1=CC=C(C=C1)N2C(=C(N=C2C3=C(NC4=C3C=C(C=C4)Cl)C5=CC=C(C=C5)Cl)C6=CC=CC=C6)C7=CC=CC=C7	5.08092
600	Chembl4570594	155562957	C1=CC(=CC=C1C2=CSC(=N2)NC(=O)CSC3=NC(=C(N=N3)C4=CC=C(C=C4)Br)C5=CC=C(C=C5)Br)Cl	5.55284
601	Chembl4573221	155563314	CC1=CC(=CC(=C1C)C)C(=O)N2C3=CC=CC=C3N=N2	5.37366
602	Chembl4572048	155563415	C1=CC=C(C(=C1)CSC2=NC(=CC(=N2)C3=CC=C(C=C3)Br)C4=CC=C(C=C4)Br)Cl	4.72125
603	Chembl4573584	155563631	CC1=C(C=C(C=C1)C(=O)N2C3=CC(=C(C=C3N=N2)Cl)Cl)C	5.41794
604	Chembl4574530	155563923	CN1C=C(C2=CC=CC=C21)C(C3=CC=C(C=C3)C4=NN=C(O4)C5=CNC6=CC=CC=C65)C7=CN(C8=CC=CC=C87)C	4.69897
605	Chembl4575673	155564193	C1=CC=C(C(=C1)CSC2=NC(=CC(=N2)C3=CC(=CC=C3)Br)C4=CC=C(C=C4)Br)Cl	4.72125
606	Chembl4574481	155564556	C1=CC=C2C(=C1)C=C(C(=O)O2)C3=NN(C(=S)O3)C(C4=CC=C(C=C4)Cl)NC5=CC=C(C=C5)C6=CC=C(C=C6)NC(C7=CC=C(C=C7)Cl)N8C(=S)OC(=N8)C9=CC(=O)OC1=CC=CC=C19	7.1549
607	Chembl4577650	155564904	CC1=CC2=C(C=C1C)N(N=N2)CC(=O)C3=CC=CC=C3O	5.48149
608	Chembl4578211	155565000	CN1C=C(C2=CC=CC=C21)C3=NN=C(O3)C4=CC=C(C=C4)C(C5=CN(C6=CC=CC=C65)C)C7=CN(C8=CC=CC=C87)C	4.69897
609	Chembl4578419	155565007	C1=CC=C(C=C1)C2=CSC(=N2)NC(=O)CSC3=NC(=C(N=N3)C4=CC=C(C=C4)Br)C5=CC=C(C=C5)Br	5.55284
610	Chembl4579286	155565566	C1=CC=C(C=C1)C2=C(C3=C(N2)C=CC(=C3)F)C4=NC(=C(N4C5=CC(=CC=C5)Cl)C6=CC=CC=C6)C7=CC=CC=C7	5.08092
611	Chembl4580550	155565848	C1=CC(=CC(=C1)F)CN2C=C(N=N2)CSC3=NC4=C(S3)C=CC(=C4)Cl	4.69897
612	Chembl4580552	155565849	CC(=CCC/C(=C/CCC(C)(CCC1=C(C(=CC2=C1C(=O)C3=C(C=C(C=C3O2)O)O)O)O)O)/C)C	4.59517
613	Chembl4582990	155565952	C1=CC=C(C(=C1)C2=NN=C(O2)C3=CC=C(C=C3)C(=O)NNC(=S)NC4=CC=C(C=C4)C(F)(F)F)Cl	6.22185
614	Chembl4582866	155566243	C1=CC=C(C(=C1)C2=NN=C(O2)C3=CC=C(C=C3)C(=O)NNC(=S)NC4=CC=C(C=C4)F)Cl	6.39794
615	Chembl4587284	155566721	CC1=C(C2=CC=CC=C2N1)C3=NN=C(O3)C4=CC=C(C=C4)C(C5=C(N(C6=CC=CC=C65)C)C)C7=C(N(C8=CC=CC=C87)C)C	4.69897
616	Chembl4586570	155566820	C1=CC(=CC=C1CN2C=C(N=N2)CSC3=NC4=C(S3)C=CC(=C4)Cl)F	4.69897
617	Chembl4586665	155566948	C1=CC=C(C(=C1)C2=NN=C(O2)C3=CC=C(C=C3)C(=O)NNC(=S)NC4=CC=CC=C4F)Cl	6.39794
618	Chembl4586054	155567023	C[C@H](CN1C=C(N=N1)C2=CC=C(C=C2)C(F)(F)F)OC3=C(C=C(C=C3)Br)OC	4.85387
619	Chembl4590536	155567941	CC1=CC(=CC=C1)/C=N/NC(=O)C2=CC3=CC=CC=C3OC2=O	5.95861
620	Chembl4590014	155568099	C1=CC(=CC=C1/C=C/2\C(=O)NC(=O)S2)N3C=CC4=C(C=CN=C43)Br	6.25964
621	Chembl4590046	155568175	CC1=C(C2=CC=CC=C2N1)C3=NN=C(O3)C4=CC=C(C=C4)C(C5=CNC6=CC=CC=C65)C7=CNC8=CC=CC=C87	4.69897
622	Chembl4591646	155568325	CC1=CC(=CC(=C1)N\2C(=O)/C(=C/C3=CC=C(C=C3)F)/S/C2=N\NC(=O)C4=CC5=CC=CC=C5OC4=O)C	7.04576
623	Chembl4589823	155568837	CC1=CC(=CC=C1)N\2C(=O)/C(=C/C3=CC=C(C=C3)F)/S/C2=N\NC(=O)C4=CC5=CC=CC=C5OC4=O	7.04576
624	Chembl4592050	155569088	CC1=CC=C(C=C1)C(C2=CNC3=C2C=C(C=C3)C(=O)NNS(=O)(=O)C4=C(C(=CC=C4)Cl)Cl)C5=CNC6=C5C=C(C=C6)C(=O)NNS(=O)(=O)C7=C(C(=CC=C7)Cl)Cl	7
625	Chembl4593597	155569623	C1=CC=C2C(=C1)N=C(N2CC3=CC=C(C=C3)Cl)C4=CC=C(C=C4)/C=C\5/C(=O)NC(=O)S5	6.26761
626	Chembl4593969	155569636	COC1=C(C=CC(=C1)C2=NN=C(S2)/N=C/C3=CC=C(C=C3)O)OCC4=CC=CC=C4	5.63827
